# Supplementary material for: Characteristics of quiescent adult neural stem cells induced by the bFGF/BMP4 combination or BMP4 alone in vitro
Source: Front Cell Neurosci. 2024 May 22;18:1391556. doi: 10.3389/fncel.2024.1391556 (PMC11151745; doi:10.3389/fncel.2024.1391556)
Supplement: Supplementary file 1 [file Table_1.xlsx]

## Sheet: Sheet1
Supplementary Table S1. The marker gene set used in ssGSEA analysis.
Group	symbol	Reference
Astrocyte	Mlc1	Friedmann-Morvinski D, Bhargava V, Gupta S, Verma IM, Subramaniam S. Identification of therapeutic targets for glioblastoma by network analysis. Oncogene. 2016;35(5):608-620. doi:10.1038/onc.2015.119
Astrocyte	Gfap
Astrocyte	Tmem47
Astrocyte	Pbxip1
Astrocyte	Aldh1l1
Astrocyte	Acsbg1
Astrocyte	F3
Astrocyte	Slc39a12
Astrocyte	Phkg1
Astrocyte	Chrd1
Astrocyte	cldn10	Mizrak D, Levitin HM, Delgado AC, et al. Single-Cell Analysis of Regional Differences in Adult V-SVZ Neural Stem Cell Lineages. Cell Rep. 2019;26(2):394-406.e5. doi:10.1016/j.celrep.2018.12.044
Astrocyte	Slc1a3
Astrocyte	S1pr1
Astrocyte	Aqp4	Kleiderman S, Sá JV, Teixeira AP, et al. Functional and phenotypic differences of pure populations of stem cell-derived astrocytes and neuronal precursor cells. Glia. 2016;64(5):695-715. doi:10.1002/glia.22954
Astrocyte	Mertk
Astrocyte	Cyp4f14
Astrocyte	Pygb
Astrocyte	Acta2
Astrocyte	Ntsr2
Astrocyte	Id2
Astrocyte	Fgfr3
Astrocyte	Ccdc80
Astrocyte	Agt
Astrocyte	Atp1a2
Astrocyte	Aldoc
Astrocyte	Kcne1l
Astrocyte	Tlcd1
Astrocyte	Slc9a3r1
Astrocyte	Thrsp
Astrocyte	S100b
Astrocyte	Nfix
Astrocyte	Slc25a18
Astrocyte	Csad
Astrocyte	Sox9
Astrocyte	Mgst1
Astrocyte	Tnc
Astrocyte	Sparcl1
Astrocyte	Ezr
Astrocyte	Numb
Astrocyte	Id4
Astrocyte	Gja1
Astrocyte	Glul
qNSC	Htra1	Shah PT, Stratton JA, Stykel MG, et al. Single-Cell Transcriptomics and Fate Mapping of Ependymal Cells Reveals an Absence of Neural Stem Cell Function. Cell. 2018;173(4):1045-1057.e9. doi:10.1016/j.cell.2018.03.063
qNSC	Atp1a2
qNSC	Ntm
qNSC	Aldoc
qNSC	Mfge8
qNSC	Cst3
qNSC	Fxyd1
qNSC	Id3
qNSC	Fbxo2
qNSC	Gfap
