# Supplementary material for: Characteristics of quiescent adult neural stem cells induced by the bFGF/BMP4 combination or BMP4 alone in vitro
Source: Front Cell Neurosci. 2024 May 22;18:1391556. doi: 10.3389/fncel.2024.1391556 (PMC11151745; doi:10.3389/fncel.2024.1391556)
Supplement: Supplementary file 2 [file Table_2.xlsx]

## Sheet: Sheet1
Supplementary Table S2. Gene expression matrix of aNSC, qNSC2, qNSC2 and astrocytes used in the CIBERSORT analysis.
	aNSC	qNSC1	qNSC2	astrocyte
Arl8b	51.2719	85.5582	122.992	48.824
Syne1	0.821645	5.32784	37.2844	54.2515
Smox	31.0065	63.4044	62.6549	121.275
Tbc1d7	69.0602	8.313	24.7376	69.8945
Strn4	29.5629	10.9559	16.3287	1.30555
Npepps	38.6853	74.4674	81.3633	107.389
Mzt1	116.162	37.7068	33.0377	13.8383
Prex2	1.84335	32.352	107.925	103.612
Cenpu	24.3363	5.61048	0.892543	4.43895
Rsrp1	262.374	492.204	669.2	832.568
Cnp	65.983	118.54	241.016	124.13
Tpm3	202.994	79.2606	51.4532	77.6196
Fubp1	68.7178	12.9146	19.7454	21.4469
Zkscan7	0.62129	0	0.593143	10.1105
Snrpd1	348.118	57.7173	38.0139	55.1858
Inpp1	4.67839	7.25268	14.803	35.8426
Gnas	554.026	781.258	443.132	186.108
Dzip1l	3.17058	10.8056	14.6377	42.3817
Cenpi	24.1722	0.06588	1.2162	0.46695
Cpt1a	10.7816	51.6107	40.5737	40.0016
9530068E07Rik	123.032	53.6828	43.9519	18.6975
Fanca	18.5033	0	0.00328571	0.00785
Pink1	63.0533	113.066	45.3459	19.5263
Bin3	34.7649	6.47364	0.00294286	9.0367
Ppp1r3g	4.29955	11.0172	48.1112	111.094
Slc7a10	10.0502	146.321	592.091	589.676
Sh3pxd2b	2.78881	8.35124	21.2947	27.1888
Cep68	28.7476	9.01836	13.3985	42.3954
Dlc1	0	3.70588	6.86683	20.8464
9430038I01Rik	34.0562	0	6.46409	12.5318
Rabac1	86.3855	363.045	396.234	184.929
Kif18b	16.6264	0	0	0.00505
Kitl	22.4815	4.54272	0.561029	0.0049
Tgfb2	5.57165	27.7807	26.546	34.196
Gcnt4	0	5.0754	13.0502	16.5499
Dcakd	114.941	40.294	47.8593	5.31325
Lrrn2	0.668355	7.2616	12.6219	19.6117
Mro	11.5296	56.8597	87.2459	40.6543
Kat6b	8.14358	22.6237	19.9194	1.4091
Pold2	146.856	39.5178	23.935	12.0173
Atp5g2	544.57	205.251	169.623	73.7115
Troap	48.7569	0.00244	0.00531429	0.00685
0610040J01Rik	0	4.92252	15.0176	25.2904
Ttc9b	16.8082	0	1.59997	2.093
Sh3bgrl3	180.219	161.662	57.2993	18.6738
Izumo4	1.97884	56.2756	24.5544	27.0139
Rps3a1	1438.51	411.097	159.59	103.929
Nopchap1	22.1644	0.20236	2.94134	4.12835
Zcwpw1	34.733	0.59424	6.37497	0
Inip	46.2522	10.0449	9.89994	5.11155
AI413582	25.0874	104.393	144.997	118.442
Serpine2	34.9361	307.615	919.283	541.342
2810454H06Rik	0.733806	13.9964	5.28694	1.30805
Hsph1	63.1455	24.9319	7.35063	4.7036
Cdc37l1	8.24419	19.854	20.1651	24.6925
Dll1	85.6386	2.57844	0.00105714	0.03555
Psmd7	137.239	89.4859	80.1195	18.1703
Rab2b	19.3169	6.17088	14.2341	45.7587
Lgi4	11.7803	81.27	99.828	75.3391
Bex2	325.406	70.7685	24.0259	18.4433
Gm14276	23.1037	5.28704	0	1.43535
Acadvl	27.5627	173.955	104.64	100.857
Fgfr3	39.139	62.4794	239.303	308.55
Zfas1	99.3849	30.4818	10.5986	18.482
Ramp1	6.66171	36.9598	126.37	91.7862
Rpl18	1322.18	469.423	312.511	137.001
Rbm17	150.218	46.6063	36.9839	18.1536
Tdp1	74.203	15.6598	12.2727	17.1
Pigs	46.6479	81.6574	186.384	118.025
Slc7a4	0.00532258	27.315	16.2721	5.05145
Hnrnpa2b1	675.388	267.025	248.177	258.729
Nup35	95.205	34.2807	8.25971	39.6037
Hmgn2-ps	141.565	8.54912	3.51177	0.9202
Emc7	13.2092	32.8319	58.9852	42.1141
Wdr61	217.413	127.262	57.051	50.1092
Med10	132.92	55.2194	33.1962	46.8701
Lockd	341.042	8.74904	3.1462	0.1224
Trim9	37.1268	81.1404	90.2457	138.404
Zfp346	13.6838	0.02112	4.34663	13.1763
Rtn2	14.9229	17.5047	5.31269	0.0041
Stil	19.4786	0	0.0202857	2.22765
Efhb	0.00687097	17.9368	3.10397	0
Tsc1	12.7975	7.42676	5.63177	49.9791
Trim13	25.725	4.15288	4.85991	15.613
Rpl41	2323.37	894.437	436.78	273.182
Klf11	14.6973	3.38696	0.167629	8.8622
Rragc	21.1521	6.10292	7.30443	0.6958
Fkbp1a	333.352	154.241	110.5	67.7143
Phyhipl	95.4242	189.825	450.246	373.634
G0s2	16.3283	16.6721	46.1243	64.8156
Lima1	115.967	2.50172	6.09871	10.6981
Cnot6	33.8471	4.49264	12.3583	1.9089
Nde1	134.064	67.2534	87.4137	29.771
Taf10	79.6727	31.7494	33.3577	10.1477
Fancd2	23.3986	1.5754	0	0
Nras	72.0529	35.425	24.6419	16.286
Haus1	84.4755	6.20536	11.2996	18.5509
Ss18	67.1243	36.4288	8.56809	8.92695
Rpl37a	994.974	344.152	166.317	138.933
Abcg2	15.0699	0	0	0.0039
Glul	197.384	694.555	1139.43	1856.58
Olfr287	0.0125806	8.27916	19.6772	36.6658
Taf9	299.66	94.3611	65.1259	43.931
Sorcs2	5.93313	4.16972	43.0355	45.8426
Golm1	35.0444	4.34772	7.95269	5.9365
Akt2	103.768	60.2381	72.7989	212.694
Il33	2.95981	0.02424	90.71	85.5527
Psd2	7.02132	25.7343	39.0143	39.2156
Selenop	38.6963	278.081	1108.96	598.801
Trp53	157.938	24.2239	12.2244	8.0701
Pkd1	2.81255	7.98416	5.54786	11.5418
Pde7b	0	0	16.6933	17.2602
Spidr	24.0044	10.4096	0.0247714	1.16515
Ppp1r15a	53.8688	9.99836	14.5419	2.99755
Rasgrp1	0	13.8884	19.3464	28.8972
Gnl1	28.2923	21.2609	9.67703	1.97305
Fancl	33.0246	1.65444	14.5955	5.2612
Ccdc107	22.8189	39.1658	58.5267	0.7345
Rnaset2b	129.594	193.702	318.216	209.068
Thrsp	448.109	82.3672	96.9935	209.421
Fuca2	2.61513	22.2888	70.5832	89.7035
Mif4gd	17.6258	72.5643	60.4883	84.7189
Blm	7.69868	0.00228	0	0.09855
Upf3a	37.0335	6.25352	5.49386	6.5684
Ptx3	36.1445	48.0362	23.8352	0
C4b	0.518645	50.8867	47.4777	9.73265
Gldc	14.1861	72.0869	58.3602	30.452
Prox1	7.67152	0.00616	0.0128286	0.0105
Cdo1	11.5046	12.8453	50.3465	8.27125
Wdr18	39.5569	20.2755	14.8549	0
Kidins220	9.85494	26.5345	43.0514	39.4652
Eif3e	247.262	87.5658	48.7843	18.4349
Bhlhe40	12.5039	59.0496	113.234	83.008
Ccdc58	46.2471	8.57836	6.01977	9.58775
Apc	23.0987	29.8395	36.0332	63.488
Slc7a11	2.7381	12.9422	44.7766	48.0052
Srsf4	100.458	56.308	23.0001	23.9069
Lyrm4	139.43	140.751	132.616	28.2343
Lmcd1	19.0823	25.0081	64.5092	80.1266
Gramd1b	7.47616	12.1222	26.26	53.9811
Mkrn2	45.1698	16.2169	5.63803	9.0167
Eya1	3.03784	0	3.80614	58.0122
Zfp637	142.624	51.5958	38.842	83.3325
B3gnt5	46.8339	5.55644	1.31649	0.00775
Cldn10	75.2232	377.657	1448.52	612.199
Bud23	73.2902	36.4785	17.7949	21.1058
Eef1e1	103.021	3.43656	31.0765	22.6186
Cnbd2	4.20048	13.2331	24.6663	16.2138
Fads1	102.772	270.35	164.459	145.777
2610035D17Rik	5.65026	24.4938	21.4379	1.57655
B3glct	3.26355	17.3038	8.20663	18.0656
Snrpf	205.101	28.4284	14.2535	7.7559
Dlx2	66.0675	6.70224	2.05563	0.73435
2310039H08Rik	46.8638	29.9208	14.0549	5.9874
Stk3	17.8992	10.1665	16.122	0.6301
Rbmxl1	201.236	32.1647	28.6287	13.1322
Psmd12	129.053	41.639	52.2747	38.3723
Jmjd1c	22.2762	18.3093	28.1445	70.6991
Shisa9	0	6.82164	26.3384	14.7561
Stx5a	70.5101	29.9578	62.0767	142.3
Poc5	19.5019	7.59884	10.0171	0.2942
Vkorc1	78.7853	152.005	102.816	26.2714
Afmid	15.6008	0	0.607771	0.0036
Ccpg1	29.0765	58.2149	65.9939	24.8705
Pacsin1	0	28.1638	12.24	0.299
Cdc45	64.1572	4.7546	0	6.97375
Hmgcs2	7.80045	165.316	116.574	0
E2f8	18.3202	0	0	0.00295
Cep43	37.6441	8.89028	3.01957	5.479
Ipo11	55.9686	15.7937	14.3858	5.67065
Slc38a3	49.403	136.45	376.43	465.395
Man2b2	7.65555	29.7415	31.3544	23.2703
Gpn3	58.1389	27.4198	4.36763	13.0829
Hnrnpab	430.072	27.5657	14.4519	7.7031
Ppil1	167.561	31.1231	24.357	9.5895
Gdf1	8.53206	49.2786	113.418	87.5299
Acot1	143.708	118.342	84.7789	18.4013
Ewsr1	393.711	63.2767	68.1808	109.056
Nkiras2	34.7285	7.0418	4.22303	3.8768
Slc10a3	18.672	0	0.0478857	0
Gpr155	0.0203548	3.71284	11.1993	51.2186
Gramd3	29.4579	90.056	103.579	104.056
Cenpa	229.219	0.14424	3.17109	4.08875
Rasa2	16.2768	44.8338	85.4765	82.0906
Tmem237	51.404	43.4882	63.662	6.9522
Fam72a	7.45339	0	0	3.2089
Slc25a42	1.15552	5.56192	8.82683	29.4859
Psme3ip1	92.9217	24.9398	25.8938	29.9302
Id4	60.0675	382.122	298.063	133.645
Rpl13a	1344.12	473.708	315.529	163.952
Olig2	70.5295	0.00244	5.00537	11.8972
Ccnl2	87.0656	34.5807	86.3086	170.189
Arhgap5	17.9302	37.0537	65.2001	57.9772
Xpr1	2.98919	11.6892	29.2274	28.1878
Ppargc1a	11.2121	22.3574	32.5918	58.3895
Pigbos1	46.0311	8.22172	17.8772	5.7315
Cep44	50.1215	19.6878	7.91857	8.2187
Prps2	30.8042	10.4681	1.46589	0
Cd82	7.97984	148.042	46.5924	5.1884
Pcdh11x	2.40281	5.40784	10.8685	21.7047
Id2	48.2235	391.619	912.646	1152.34
Fignl1	59.9766	0.00512	1.35317	0.00305
Maz	49.5993	9.14836	8.971	2.28015
Btbd1	47.2767	28.5438	27.114	5.8928
Nsdhl	36.2155	70.5704	84.8532	101.888
Gm2a	40.1841	84.1082	116.115	90.2143
Lgi1	0.742323	0.0052	27.4804	43.8402
Pon2	54.7978	111.07	245.953	161.83
Pcp4	1.25761	0	20.8284	49.245
Sorbs1	38.7125	130.857	99.7652	33.386
Cenpe	20.7004	0.00176	0.00151429	1.43665
Grm3	35.4673	75.9651	443.098	308.22
Stmn1	2523.31	52.5576	56.5829	17.1835
Folh1	0.002	2.57544	40.8539	22.6236
Heph	0	3.85708	11.3884	10.7033
Spa17	19.819	26.5721	2.48409	0
Slc9a3r1	65.1848	205.813	261.585	247.872
Anxa2	0	156.061	7.87766	0
Fabp7	2699.9	839.209	380.172	388.462
Rnaseh2c	68.3058	21.9825	4.70217	2.1959
Hey2	0.757226	20.8192	6.7316	0
Rpl27	251.98	67.9984	17.5373	66.8403
Anapc15	85.0767	6.96244	9.49789	21.8475
Elmo2	40.5077	19.9668	89.2111	141.041
Tprgl	45.7103	154.545	65.4594	29.6397
Rgs6	0	17.3295	13.556	15.9589
Ngdn	90.0652	22.5427	38.3261	23.5606
6330403K07Rik	63.7791	667.333	217.085	18.6441
Cyb5a	171.985	367.725	357.4	193.639
G530011O06Rik	0.325774	16.193	12.0235	0.1592
Eif4a1	735.811	124.446	96.3164	75.6055
Gm2115	2.5751	47.9923	72.1047	24.6807
Plpp3	208.591	1030.81	1856.93	1399.14
Slc25a29	9.81729	8.57544	35.9601	42.2839
Kif15	29.7668	0.00456	0.0356	0.1037
Chst2	8.81187	24.1186	58.8806	53.2844
Efcab11	23.8006	0.01288	0.281314	0.00435
Siva1	199.763	41.3781	6.57546	9.195
Dnajb2	27.4818	61.8461	52.9733	15.8905
Olfml1	0.00351613	37.4478	69.6741	108.382
Bcl2	4.1161	19.1754	29.7134	23.0936
Aaas	51.8946	0	20.6103	8.01365
Isg20l2	45.6596	17.1329	4.88934	11.2998
Snrpc	115.807	31.7557	19.0126	15.5923
Nrcam	13.4632	22.3971	61.2529	66.5609
Chchd10	14.1356	209.582	347.531	222.81
Prss56	33.1813	6.79228	1.81571	11.1882
Srebf2	48.2075	48.405	61.5347	122.538
H1f4	104.667	11.0698	5.44111	6.04965
Nat8f3	0	6.49592	22.5593	32.4925
Mras	9.04316	34.3275	103.204	69.1526
Adgrl2	25.7132	14.0917	10.2359	0.537
Iqcb1	34.3813	11.5623	23.5214	2.10485
Rpl6	839.982	285.196	151.92	103.183
Txndc5	43.6235	106.542	122.418	47.7097
Tmx2	141.895	170.021	373.743	237.075
Fbxo5	65.7665	0.01696	0.236057	0.0234
Chtf18	21.2997	0.025	0	0.0026
Mrps18c	105.985	52.5809	26.1909	73.1467
Wdr5	58.1053	27.9661	6.75571	3.56255
Asrgl1	89.0291	188.72	200.336	120.313
Arl4a	14.6427	53.1725	44.2753	35.111
Vrk1	54.9907	0.0024	3.0946	0.01715
Pcbp1	287.83	96.8465	86.8394	96.4439
Zbtb18	22.6034	7.60744	2.86234	0.3991
Tubb6	33.1111	12.7545	0.0747429	0.0042
Apex2	20.1914	1.3214	2.84054	20.6818
Klhl23	24.528	10.6587	5.42231	2.1826
Prpf38a	95.4958	51.4557	8.60134	4.07315
Sgip1	36.3698	81.8959	95.9813	107.811
Retsat	5.71319	18.0772	67.2605	56.7747
Cit	26.9609	0.0024	1.27123	15.1959
Slc4a2	5.1331	8.1486	4.13983	22.6243
Ahcy	118.663	36.2138	20.8774	7.63245
Polr2b	51.9471	15.8891	17.2013	12.1533
Dph5	53.8252	7.2338	7.05957	1.30465
Gen1	8.18506	0	0.00297143	0
Gm10359	76.7388	90.6946	114.117	235.037
Psmb3	397.842	183.486	215.048	85.8985
Mest	49.8718	34.4698	7.22306	0.0174
Hint1	698.311	229.623	176.522	141.28
Tcp11l2	3.50748	61.8463	9.94443	22.8208
Myt1	9.04539	0.00192	0.00251429	0.01
Pih1d1	102.088	7.78608	4.59686	37.461
Zscan29	14.1309	2.562	1.42609	0.24025
Rpsa	894.981	204.461	79.169	51.3876
Il18	113.362	188.683	374.151	428.723
Abcd2	11.4385	2.13084	27.3478	57.1048
Cmss1	46.2719	0.1068	8.90483	10.8288
Naa15	33.4512	5.04452	8.40191	9.322
Ebna1bp2	125.55	44.846	30.8756	46.4149
Cep85l	5.40868	9.53808	22.1755	43.7634
Rnaseh2a	102.582	42.0464	21.7405	2.6934
Dph2	26.3544	10.2192	1.80466	0.00795
B3galt1	5.29926	15.2542	39.9797	31.8256
Sh3glb2	18.7617	50.7753	39.6721	99.7568
Acat3	5.72045	52.145	47.6169	60.1913
Rbm3	553.142	135.131	93.6465	94.2936
Cbx5	129.202	67.6731	36.6475	21.8664
Thop1	57.1799	22.9999	6.75349	9.5316
Smarce1	75.4481	15.7485	12.3913	8.00835
Exosc8	107.172	12.7377	12.8498	10.4218
Prpf40a	137.102	28.9354	52.1528	57.7335
Irf9	6.35116	18.2654	12.0423	0.00305
Taf5l	31.0741	2.44056	4.55654	3.08265
Lrp3	9.90516	17.4794	47.2333	186.839
Mapk12	11.7438	27.7681	15.9385	0.35475
Gm2000	367.741	94.8295	55.4559	61.4832
Akr1a1	547.044	314.47	168.098	108.88
Pnisr	96.2736	145.37	230.06	363.835
Med11	46.3534	13.8372	7.5508	15.2593
Dnajc9	254.147	86.2103	44.7862	15.6771
Flcn	9.45	4.94844	33.0301	82.7567
Dll3	39.2735	0	0	0
Dctpp1	227.176	11.6026	5.88949	8.22575
Ppic	57.1292	0	0	1.6944
Tpm4	174.177	30.6065	31.8121	1.0578
Mt3	160.6	1664.83	1773.47	1881.34
Rtkn2	30.1186	0.00156	0	0.0255
Rpl9	1396.21	625.822	269.093	185.315
Rps14	1244.24	436.259	261.643	186.503
Pus3	33.9317	23.1156	8.69517	2.50335
Glcci1	17.4664	0.69904	0.353171	8.1327
Zc3h14	48.2942	23.164	25.9555	5.17385
Rgcc	19.3814	175.689	388.153	253.498
Ntpcr	9.22952	12.9389	14.1914	26.5334
Ywhae	685.662	395.964	331.441	165.36
Trim45	6.50732	0	0	6.14775
Epdr1	26.1789	64.2038	134.142	72.3494
Ass1	22.4553	203.388	95.5663	66.304
Aldh9a1	20.4699	107.202	53.7272	70.0562
Myom3	0	9.56372	10.986	10.282
Naa20	149.235	77.6932	63.6124	36.4174
Gm7536	883.43	392.26	169.677	55.8659
Sc5d	34.7628	60.632	194.307	174.97
Psmd2	206.989	52.9794	61.9008	41.6602
Pik3r1	11.1473	28.9635	24.7325	54.4511
Sec11c	19.6972	63.7075	106.824	104.463
Abhd4	79.3085	313.604	200.304	121.937
Ece2	80.9131	36.4597	11.3124	1.72675
Gar1	41.4295	5.0604	5.51209	1.1329
Dll4	23.3489	0	0	0
Dnajc17	45.401	14.5271	2.3612	17.8352
Ppp2r2d	29.5874	6.99176	4.9818	2.6061
Fundc1	48.9771	99.7436	54.7466	19.322
Tcof1	22.0682	9.02072	3.313	0.1724
Ilf3	131.516	29.6379	17.8002	14.4903
Rcbtb2	80.281	56.1016	33.8011	7.58155
Dtymk	435.848	135.624	38.4604	63.1298
Jag1	39.5507	5.23176	6.56691	17.3673
Rps11	1526.82	393.775	184.999	207.375
Drg1	192.755	80.6338	28.8463	82.7149
Smg5	29.3562	10.4605	26.4936	62.7773
Bckdk	109.834	79.0339	29.7298	6.45085
Nars	136.727	60.4676	55.6354	23.096
Ilkap	114.743	102.706	37.2423	14.8772
Snrnp40	143.895	20.6768	12.2393	8.61225
Ccnf	45.6954	0	0.00342857	0.01175
Asb8	14.3225	29.8468	52.0979	62.4759
Cfap69	15.3188	4.01092	10.0587	0
Lrp10	11.359	40.0706	50.0037	30.7024
Mfsd2a	0.00380645	10.1242	165.181	207.782
Pycard	29.3793	4.82352	2.51391	0
Tox2	3.43729	37.4054	27.7415	15.387
Sorbs2	0.323194	0.89008	10.4192	10.516
Ndp	21.2595	46.2365	82.7158	90.8453
C1qtnf5	4.60535	11.9159	153.409	124.358
Eef1akmt1	86.6389	43.9927	36.6307	11.9979
Esco2	52.4518	0.01088	0.0167429	0.04915
Ywhaz	526.396	356.229	228.638	160.532
Naca	672.104	247.906	161.35	66.1848
Chn1	5.74787	0.00248	6.20471	30.6965
Gabrb1	0.00477419	113.826	189.544	123.342
Sncaip	59.0432	34.2865	6.83757	0.0138
Hnrnpul1	36.8649	9.34024	5.06929	8.7746
Atp5g1	507.364	120.905	173.645	182.903
Pnrc1	100.228	73.3977	24.1947	12.5414
Insm1	12.0963	0	0.0224857	0.00205
Gm10277	0.0106774	1.02508	0.0183714	10.0676
Tm2d2	110.733	199.464	228.672	104.98
Cacybp	146.919	93.6169	33.1689	17.9976
Rps15	918.178	310.664	151.056	148.325
Syt4	9.12771	0	0.0034	0.0019
Sox4	20.611	1.44348	0.376457	0.07915
Pebp1	689.146	391.234	196.089	191.586
Fth1	1140.52	2949.65	2135.09	1053.39
Nsmf	64.2471	110.937	147.796	293.294
H4c3	8.62794	0.0284	0.0151143	7.43415
Gjb2	0	6.461	21.2647	16.8669
Pcna	697.014	50.8674	39.5029	32.0936
Gal3st4	0.0117097	14.6551	42.6658	32.8846
Got2	59.1491	8.88784	11.3329	11.8186
Thap3	33.0569	135.347	57.5679	30.3898
Laptm4b	35.6148	22.008	120.126	133.48
Septin4	0.357097	42.1533	20.3688	46.5392
Vcam1	46.5733	79.8646	240.131	242.968
Magohb	50.9861	6.21112	4.09349	18.5301
Ddx50	67.8212	13.6423	19.9378	13.5539
Appl2	33.5183	97.309	291.217	304.955
Melk	76.5244	0	0.00148571	0.02885
Tomm70a	41.848	13.28	6.58746	4.1658
Eif3m	281.666	113.878	67.3109	37.4861
Impdh2	200.939	102.526	22.0811	28.468
Bora	26.0435	3.10356	4.00569	1.15375
Jun	155.772	38.0243	10.0911	27.0921
Cenpv	16.9587	0	1.78254	7.7416
Mthfd2l	14.565	3.84716	3.30774	0.02385
Ensa	122.299	56.1884	50.0815	17.9611
Cyfip1	33.8544	36.8338	68.0641	98.7555
Isoc2b	0.429258	5.28568	23.9453	15.2952
Pold3	52.2124	9.20912	4.3488	0.22105
Ddt	93.6215	231.859	263.738	243.656
Hnrnph3	151.167	53.759	37.7209	36.1441
Ccdc159	0.590065	6.9812	4.11326	10.1537
Timp4	8.73558	31.1753	435.369	351.958
Polr2g	197.358	40.1037	66.6133	53.0566
Art3	0	22.8717	12.5645	18.0842
Aup1	45.3265	58.2042	120.848	85.2212
Nolc1	44.8071	2.42104	13.295	5.464
Apoe	1923.7	15680.7	18554.7	13977
Raly	59.387	11.7337	15.3668	21.4007
Phf1	0.362258	8.04116	10.6405	8.50405
Ddo	2.37426	24.9892	22.1545	31.1807
Tekt1	4.84535	22.6125	6.17371	0
Gjb6	0.0116452	79.3714	507.374	653.093
H1f5	120.777	3.60732	0.924	9.0985
Pbdc1	55.3913	8.98628	6.82231	9.0742
Tmem14a	18.1338	29.4344	72.9059	41.2959
Myef2	115.713	15.5994	8.54663	12.9869
Tcp1	406.386	78.3425	69.6603	78.0943
Rfesd	18.6737	0	6.4546	0
Eri1	19.1326	3.24	3.43891	0.00475
Sdc1	15.2489	0	0.00331429	0.0022
Gpc5	3.935	109.678	241.764	172.499
Csnk1a1	296.244	112.194	128.782	116.12
Zfp580	30.5028	36.5748	11.2165	2.12595
Hnrnpll	58.2376	8.33504	17.9964	5.75115
Ube2q2	14.8549	23.186	38.9443	0.32865
Pola2	62.4304	1.77212	2.82511	1.35895
Slc26a11	1.35948	5.80156	11.3387	27.5574
Chaf1a	20.4909	0	0	0.00385
Ndrg2	533.748	1742.31	1626.5	1126.49
Cmas	11.5895	0.01012	0	6.4504
Ik	127.818	65.8506	23.8725	39.8839
Hopx	2.47803	6.24944	10.6481	36.296
Romo1	220.939	141.275	95.6761	52.2172
Mtap	55.228	21.5007	4.61677	11.9594
Dscc1	14.6827	0.00572	0.00194286	0.0119
Hid1	7.54861	0.00188	0.0105429	6.39825
A830082K12Rik	6.75706	10.3548	10.7029	28.8429
Sumo2	1312.15	377.346	316.044	285.971
Septin3	35.9613	26.5334	0.8966	0.0173
Cenpk	77.8232	0	0.0068	0.00985
Bola2	57.7977	20.8694	7.64149	22.3981
Caprin1	177.077	59.0074	39.9761	25.2469
Dynlt1b	297.67	210.272	119.431	58.4629
Usp9x	15.4721	24.2824	26.0702	4.3108
Itpa	200.022	55.225	32.7374	22.4399
2210408F21Rik	0	6.05108	27.1552	18.6925
Pgf	0.0634839	27.268	4.26943	0
Pcbd2	56.3682	23.3225	16.7527	11.3743
H2-K1	36.3775	84.4556	154.282	86.8945
Wdr74	61.673	37.3024	4.30483	22.5275
Tom1l2	9.75284	52.408	56.4431	76.7096
Hivep2	2.4541	8.49664	3.18334	24.5959
Haus4	90.1457	5.71504	2.1148	0.0046
Rpl30	784.193	352.645	188.814	129.762
P4ha1	12.2385	10.314	85.4536	80.6226
Phf19	18.2981	0.004	4.02989	0.03695
Cnih4	175.062	69.7299	95.1703	45.4286
Pawr	0.478129	19.0768	0.1562	0
Tmc7	5.1841	15.8033	24.1216	45.7269
Gabarapl2	183.08	333.994	211.778	89.4138
Hsd3b7	9.86048	51.5942	80.9284	64.7593
Ipo5	84.6363	20.7092	11.5939	10.0732
D630033O11Rik	0.420226	14.6773	5.11526	1.1221
Clns1a	230.502	27.317	72.2595	23.9492
Tmem50a	103.934	273.822	257.853	192.915
Arl6ip4	53.3515	17.8617	16.0041	8.8661
Ggact	10.5377	22.2818	36.1868	47.2779
Mcm6	236.26	12.1942	2.60423	8.49725
Alg8	26.9052	3.83168	6.89023	2.481
Gsx2	53.7049	48.0971	0	0.00985
S100a4	10.4386	377.498	37.3121	97.3991
Lars	50.9425	18.8984	16.5375	4.44965
Txn1	299.63	173.732	60.4123	53.0354
Entpd2	6.27635	144.729	350.605	232.889
Morf4l2	208.249	107.628	38.5064	68.6731
Hapln1	1.41242	5.34412	53.0251	52.2262
Taf9b	9.71468	33.5501	26.7201	25.2538
Pmvk	32.8565	85.7047	84.3093	79.6221
Psmd4	201.39	69.8507	84.3126	72.6325
Pfdn4	45.3547	2.46908	8.86709	3.0061
Rps13-ps2	161.345	83.9078	46.6587	18.3286
Prkar2b	9.07252	0	0.902371	0.0022
Camk2n1	0.928774	4.24644	20.7052	18.0521
Glmp	21.9655	110.958	234.75	200.298
Psmd14	195.992	54.7388	91.3512	73.8786
Map4k2	0.198677	1.04544	8.15894	23.2634
Timp2	2.39929	27.9061	20.7129	23.8708
Mcph1	8.63803	0.00712	0.838143	12.3512
Hmmr	57.4941	0.05944	0.0730286	0.1873
Gstm1	292.991	2259.52	2218.52	1431.24
Sumo1	300.843	102.537	92.3195	98.4364
Fen1	68.6776	0.084	0.0113143	2.99275
Rbp1	31.5805	84.3589	105.118	26.6837
Suv39h1	48.3445	5.41316	18.1491	5.17455
Rpl7	993.791	477.934	265.785	200.987
Nupr1	3.68003	2.71276	5.84617	66.3431
Slc38a2	44.4073	14.1445	4.90529	11.6553
Spr	38.4439	96.5732	58.3609	6.53555
Kbtbd6	10.0996	0	0	0
Hnrnpr	163.795	67.4012	15.8296	14.3261
Hpf1	127.693	26.831	53.4461	37.3488
Sae1	318.125	47.349	39.3822	17.4151
AA465934	5.44126	6.6768	24.4669	44.9712
Xrcc5	38.7499	18.3858	20.2641	2.8914
Cdk2ap1	353.737	41.4775	41.5035	55.4671
Ppp4c	203.624	61.8363	20.3403	19.3712
Exosc5	72.4478	36.4533	26.9499	9.624
Snu13	371.577	163.894	107.38	51.1501
Efnb1	20.7736	16.5578	1.45543	0.02585
Hmgn2	6907.05	542.287	249.213	80.084
E2f2	8.08342	0	0.00108571	0
Ttk	43.3978	0	0.00945714	0.02075
Bag2	46.5136	17.9032	0.150943	4.77185
Adck2	12.872	22.7944	40.3691	70.3425
Rorb	25.6544	81.7642	92.7271	112.517
Srl	16.9252	0	0	0.00475
Atp8a1	3.90839	33.1999	29.4561	13.4962
Trim37	55.2569	33.0573	5.17443	1.928
Gm5617	33.8867	17.057	28.4701	0
Dclre1a	24.0449	0.80556	0	19.4462
Trnt1	64.3926	27.567	11.4352	20.1884
Nnat	430.31	174.725	300.738	33.2224
Clspn	29.4192	0	0	0.0615
Ywhaq	897.462	432.161	192.616	111.533
Mfng	55.7337	0	0	0.00325
Gstt1	6.00497	103.032	66.7301	60.9041
Pdgfc	0.951516	16.4987	16.1801	8.1858
Gm4767	1.22168	4.28524	9.54754	1.0294
Amer2	5.97713	3.2544	16.2533	31.2689
Rps8	679.423	223.251	126.217	48.8777
Zbed3	69.3668	35.2917	15.2816	15.0258
Tmed3	62.2377	138.089	138.684	94.4087
Fau	208.982	101.175	64.4468	47.88
Pgam5	64.0076	29.1809	6.54803	15.4009
Mis18bp1	55.5358	0.0014	0.0146571	0.02995
Bdnf	0.602032	0.66156	0.204571	9.84745
S100a10	69.7822	229.352	17.6352	22.2148
Zfp784	5.64939	23.6591	4.58171	0
Vwa5a	4.83339	40.3495	15.8601	5.923
Pdzd11	206.116	51.9109	70.5158	20.9945
Ppp1r1b	2.7921	114.196	99.1083	27.0431
Slc35g2	2.47816	12.5889	16.6488	17.1995
Cct4	249.607	102.969	66.6952	71.7335
Usp39	70.953	9.98148	15.9848	15.3223
2810459M11Rik	54.1887	74.7694	31.7322	6.251
Ahcyl1	57.1923	64.0565	173.205	126.952
Lrrc8d	29.9161	6.69804	10.3519	5.53665
Sumo3	331.095	168.323	69.3358	22.1836
Selenom	35.1394	110.302	69.5477	29.7781
Rad51ap1	47.4996	0	0.00214286	0.02125
Rhoc	20.5966	72.6924	78.4985	14.473
Rrm1	201.814	19.6138	7.68817	9.38205
Emc9	6.82294	18.1408	53.1987	35.6251
Adcy2	3.41374	18.39	28.7431	21.8813
Panx1	18.4074	4.75272	4.32554	0.0231
Ubap2	34.7552	2.4928	3.2222	11.6943
Fnbp1	14.7713	37.4083	46.4713	76.7134
Rps29	1358.54	594.214	293.264	237.542
Tyw3	19.7532	6.25664	10.1859	0.41
Spc24	149.065	0.44324	4.0224	1.4548
Hsd3b9	7.55371	7.15688	14.1929	23.6454
Ttf2	17.1462	0.132	0.146229	0
Gabbr1	6.10845	32.8354	75.6901	55.9215
Sod3	0.0498065	1.71532	52.5407	33.7884
Gpd1	21.609	4.96204	2.77497	33.9965
Mis12	44.1009	9.28788	6.61291	12.8842
Nudt4	43.1404	0.47692	9.8302	0.0384
Rfc4	242.586	3.85288	11.2095	11.4037
Adal	25.8568	23.1338	6.329	0.04205
Cend1	8.69687	12.3081	19.3397	58.6659
Cct2	256.535	66.5751	80.3301	20.5669
Atad5	13.2167	0.0024	0.000828571	0.2991
Dynlt1a	90.6843	4.01452	1.32186	0.01225
Cdh2	46.7069	54.2117	98.5251	124.714
Tk2	17.7659	51.6164	22.5335	0.0076
Noa1	33.5749	4.32984	6.93469	12.9886
Pld2	1.36919	30.5996	29.1093	36.2896
Cd46	0.0896774	0	11.4318	13.773
Acaa2	55.3368	146.974	205.869	89.744
Ier5	25.1122	0.14008	5.53929	0
Pbxip1	7.16371	71.8113	58.1695	69.1399
Snrpd2	321.361	101.926	87.0523	41.9778
Fgfrl1	1.94316	15.6862	37.9501	23.4321
Ncapg	48.4942	0.00376	0.324229	0.034
Klhdc8b	7.30142	52.7363	42.4874	18.2121
Mob3b	11.4642	2.31948	0.00142857	11.934
Ccdc13	2.64158	21.4496	16.5291	22.4067
Acsl5	9.57874	0.00316	0	0
Zfyve21	67.2232	166.705	196.055	122.777
Ythdf2	94.531	25.2129	14.6974	24.1246
Hnrnpf	546.695	237.549	91.3427	104.805
Fzd2	6.61068	19.7131	65.9833	25.8004
Ccng2	35.9976	4.787	5.05411	13.8715
Taf1a	27.9214	24.6018	4.36897	0
Det1	17.5736	0	0.199629	0
Map1b	12.4676	2.3034	0	0.00535
Tmem17	17.5036	15.3083	10.2287	0.25225
Sparc	21.9215	366.147	258.515	43.1688
Ezh2	95.0953	12.4227	14.7269	0.0857
Slc25a21	0	1.68972	3.2778	14.7271
Cd3eap	28.9806	5.74756	3.57983	18.3965
Nat8	0	13.6876	40.6929	45.9025
Krr1	52.2507	30.5204	5.5842	8.54105
Cntrob	20.2673	0	1.26243	2.4265
Sparcl1	132.043	594.577	2385.94	1563.1
Stt3b	44.5545	58.5843	117.229	66.5575
Mrps15	118.462	37.0995	40.2279	53.0399
Acss1	63.8105	98.5435	134.491	142.092
Pamr1	13.6322	74.0674	68.6355	32.5757
Eif4e2	94.7718	23.9165	24.6703	36.1593
Ctsl	31.2171	192.989	247.118	143.726
Tedc1	30.3157	0	0.00265714	0.01285
Rpl35a	828.384	297.998	123.046	95.0635
Csde1	137.449	53.1662	45.9582	19.8398
Ncam1	34.2353	23.5092	258.308	264.062
Ivns1abp	194.036	57.4302	44.6074	54.9937
Hrob	12.6837	0	0	0.3958
Cideb	5.162	5.22856	51.2962	55.3413
Tvp23b	40.0634	112.215	82.5906	42.838
Gmeb1	34.4865	8.0664	3.6986	0.62795
Dkk3	61.1313	379.894	410.91	151.502
Npc1	7.52652	14.9677	66.2937	51.2386
Hspb11	45.6033	32.0148	18.2865	2.58185
Aass	0.0602258	0	14.055	8.58635
Eif4g2	345.665	105.63	113.804	99.7606
Htra3	0	1.40424	20.2645	25.0375
Serpinb6a	13.8629	111.631	48.7902	43.9764
Msmo1	126.365	339.346	1204.72	1007.02
Ip6k2	56.1687	35.1216	19.0107	127.37
Asap2	5.00068	1.407	9.57731	20.5555
Mrps22	88.0984	14.2804	24.705	44.4821
Aldh6a1	29.6135	159.093	167.141	87.7805
Mrps28	57.476	36.6574	26.3629	3.3541
Spata6	9.16894	49.4704	15.0893	5.6704
Ugp2	56.8144	184.619	312.42	250.674
C1qbp	247.451	112.412	107.666	26.3962
Nedd4	281.882	167.91	87.5899	122.658
Spdl1	19.6741	0	0	0.0031
Omg	5.71548	76.7802	393.791	312.986
Klhl7	81.1313	38.6088	28.8803	15.164
Noc2l	22.7168	5.37464	2.95243	8.1184
Il15ra	2.10319	0	43.3113	85.0392
Pdzph1	4.85297	52.306	155.698	125.459
Matr3	285.323	115.079	62.0551	32.602
Adgra1	10.4385	24.2577	42.4179	66.0706
Ppie	102.587	55.2902	8.48086	20.9783
Mapre3	8.9121	47.0754	43.6994	30.0125
Prmt6	24.8348	0.002	10.1649	3.2224
Nrxn2	7.74877	38.6291	24.479	32.0958
Itih5	0	1.91704	22.2669	2.25135
Daam2	0.826194	6.02716	25.301	52.3556
Orc3	68.6568	33.8058	11.6225	21.9599
Lmbrd1	19.5741	111.682	124.4	81.0641
Rab11fip4	0.610516	11.5126	8.98871	10.1135
Med9	57.3434	2.27076	13.0756	7.9759
Hba-a1	0.646806	1.30504	3.9892	18.7818
Lpcat2	0.00212903	15.3689	0	0
Ank2	27.152	49.6166	109.607	198.743
Fam181a	6.91277	25.4262	39.8507	46.7674
Tfdp2	61.0541	21.8305	6.20623	14.0869
Comtd1	1.754	0	18.3826	31.8483
Actr3	111.92	48.8045	41.0232	29.5787
Slc35f6	18.6507	25.1864	97.5375	96.1311
Prdx2	904.457	370.813	324.665	233.144
Hmgn5	41.2333	15.655	10.3882	2.1553
Gpr108	19.5615	40.8515	54.5133	52.1404
Cnbp	1091.23	752.502	517.353	307.606
Cmbl	0.0490968	17.8682	36.6247	14.7719
Ccn1	36.0421	30.1524	92.9038	68.5149
Tmem59	239.171	537.233	885.728	475.362
Mybl2	23.4829	0.0016	0.970314	1.9861
Gpld1	5.21568	80.0626	202.625	133.314
Hnrnpd	51.9713	7.60584	4.37451	1.93435
Actr3b	115.685	37.4608	16.1291	28.0921
Tubb3	25.2554	0	0.00671429	0.07005
Pa2g4	248.185	69.1634	44.898	10.2578
Eef1a1	4494.97	1582.58	753.88	561.266
Ptdss2	37.9759	74.6451	75.2488	93.6179
Cd151	4.24077	15.6214	34.6905	30.0751
Polr2e	224.855	129.639	41.0641	45.3133
E130102H24Rik	3.44765	19.4586	29.2719	17.6408
Mageh1	53.6233	76.7134	96.7552	145.918
Mmgt2	13.45	64.5055	90.9907	90.3347
Hat1	298.428	29.7792	22.6603	0.1108
Pmf1	217.404	9.00224	5.9554	14.0623
Lair1	0	25.1527	7.86109	22.2947
Wdhd1	19.8603	0.05836	2.94526	0.17725
Mt2	442.268	912.554	892.927	611.82
Cfap46	0	18.026	1.86826	0.00255
Phf6	41.4423	7.76376	3.58869	5.60765
Pttg1	88.6304	180.576	183.847	107.047
Btbd17	67.7714	129.385	335.798	268.378
Zfp40	8.51097	0.00668	5.95254	33.9072
Glce	32.9253	2.28856	0.840514	2.68145
Snrpb	509.983	196.138	85.2341	67.0366
Gria2	8.23071	12.7406	47.485	174.152
Mcm5	123.447	4.26584	1.3476	0.03095
Prc1	211.512	1.20708	0.936057	1.53945
Galt	2.18358	57.5564	18.8144	19.5499
Rcor2	12.4979	0.0028	0.436629	0
Ncapd3	19.669	3.85412	2.57654	1.1896
Knl1	57.8303	0.00116	0.0179429	0.02895
Hnrnpk	1455.68	560.644	420.947	427.941
2810408I11Rik	21.542	20.9049	11.9123	0.0106
Arl4c	44.4744	23.715	4.21477	3.80105
Tpra1	27.6725	82.5085	87.7265	8.0305
Twf2	23.0094	21.6304	6.14023	48.9797
Pbk	636.614	0.04672	1.82029	0.258
Nip7	44.7877	12.1554	6.872	16.8179
Samm50	97.7575	42.3649	23.8317	38.245
Rpl35	576.575	174.246	86.6707	109.474
Ptpn4	8.82455	33.77	22.7249	26.008
Dpp7	2.32003	34.4086	41.5105	52.8203
Sox8	124.208	44.6218	50.5444	68.8704
Slc16a2	21.4145	88.1034	39.1296	27.4433
Rpl36al	463.492	132.024	177.93	108.934
Ywhah	281.191	57.1464	27.2533	11.4751
Pdgfrb	0.00122581	25.7355	34.594	30.8244
Nifk	91.1498	33.9805	26.6821	28.3743
Dcaf13	118.375	16.4363	34.3093	34.1645
Fam174b	27.0715	9.10012	0.00377143	0
Plekho2	4.66135	15.793	50.2898	50.8503
Enpp2	2.40261	20.7271	14.1511	8.33125
Lrrn1	72.6595	45.2957	26.756	9.07095
Pgm1	25.5054	75.3526	161.345	203.835
Abcg4	2.03132	12.4411	25.5136	5.6846
Nop16	75.7732	39.2362	11.416	3.93915
Cadm1	62.4486	139.451	390.938	478.352
Dcun1d5	79.4166	15.6717	32.9917	12.8765
Txnip	103.949	19.4042	20.0032	2.5421
Faap20	82.2127	34.4065	23.4684	5.42725
Rpl10-ps3	846.216	486.172	191.407	144.661
Galnt16	7.72177	49.2492	52.8404	47.1057
Crtc3	13.5459	33.4187	42.0058	38.983
Dmap1	61.7201	45.6879	15.1347	106.259
Dek	406.251	71.6235	36.4957	31.0881
Rarres2	3.65374	192.497	139.434	0.02285
Cenpm	140.776	0.01224	1.863	0.0318
Hsd3b2	3.32648	3.78812	7.38126	16.9732
Prr11	11.6289	1.20576	0.171657	0.14585
Elmod3	10.5019	21.6202	92.4463	66.9527
Ifitm3	4.08303	149.035	34.4475	6.1075
Dst	7.85503	22.1249	55.111	31.1119
2210416O15Rik	7.12194	16.0879	10.6459	39.0549
Ccdc80	16.6434	51.1485	30.848	7.33825
Mpp3	16.8273	6.34988	0.607771	20.4227
Gpatch4	39.8336	0	0.876371	4.931
Ccnd2	622.266	76.5237	12.1984	25.6044
Pcsk1n	12.4583	43.1791	37.1027	11.0837
Atp6v0b	95.8277	190.601	320.395	328.396
Luzp2	32.8281	168.409	315.542	302.652
Ppat	34.7199	0.27972	8.18543	0
Slc46a3	1.54019	14.2766	20.3426	31.6096
Rlbp1	249.045	110.274	41.08	37.2981
Ppm1g	102.245	44.0939	28.5323	0.03515
Prr16	0	11.184	3.16809	0
Ak3	53.4681	67.8795	102.95	139.986
Slc15a2	40.7448	93.8181	372.036	271.33
Eny2	46.4437	20.1598	9.36857	7.40255
Ppp1r14b	205.487	32.5522	28.7936	9.40585
Aig1	8.13565	113.84	69.6341	35.0784
3110082I17Rik	30.8002	25.6108	7.238	0
Grip1	3.44626	0	0	7.9133
Ptgs1	0	0	13.1056	57.6788
Cdkn3	37.5941	0	0	0
Rps27a-ps3	17.276	9.39776	4.01731	0.5131
Zfp287	0.423226	18.7962	12.5574	8.7705
Tspan12	67.5444	164.416	138.972	52.9383
Cept1	29.1397	22.5236	111.212	90.9581
Pdk2	37.2026	133.232	132.393	145.992
Itgav	8.68455	5.20048	39.5954	118.341
Rad51b	17.9704	0	0	0
Nmrk1	2.77719	12.0273	19.8481	31.2548
Mycn	128.01	14.4355	0.00191429	0.0089
Dnph1	135.694	7.33328	0.0185429	0
Mrpl28	192.381	88.1212	102.654	34.9109
Ttpa	1.35774	16.1215	31.0927	1.402
Hacd2	16.4169	20.1274	111.907	122.104
Gpd2	19.6661	29.3138	43.6249	78.1804
Rpl3	1443.04	554.743	204.545	116.576
Pum3	44.2048	18.4862	10.4168	0.3137
Atpif1	570.793	259.54	164.045	59.1557
Tardbp	168.411	38.3036	46.827	98.8056
Rpl32	1667.09	476.526	236.363	104.509
Ilvbl	11.0906	28.1583	36.8957	57.6419
Slc26a6	7.84965	22.7892	40.4679	121.712
Slc7a1	28.6286	4.36248	0.0447429	0.01
Rwdd4a	50.1579	14.7308	14.6832	1.62585
Rwdd1	151.058	60.5836	49.6868	39.4446
Mlh3	0.791613	2.19292	7.74466	2.21835
Ints4	72.7812	19.0683	10.7981	12.1482
Kars	149.404	44.6841	28.0673	15.89
Spata7	29.4532	10.8115	12.5633	0.0548
Ube2cbp	13.0903	0.00616	0.00248571	4.1403
Acd	56.2027	12.3762	8.86346	16.5234
Bod1	47.0837	40.2552	28.9397	5.77275
Add1	44.057	109.985	122.31	138.404
Gnao1	51.3061	220.585	349.991	617.835
Sord	48.4903	20.3366	2.58317	17.2083
Plcd4	18.9766	55.552	88.6597	125.027
Suv39h2	32.0274	0.5696	0.00848571	0.1973
Macroh2a1	173.023	36.5886	27.725	28.2599
Baalc	2.77526	9.15636	48.4008	26.0588
S100a1	97.2505	791.678	909.992	505.552
Dhfr	28.5867	3.1092	1.66471	0.0012
Gm11992	1.85252	28.4924	4.53611	0
Cd24a	79.841	0.01152	0	0.1891
Rpl19-ps11	70.4823	21.5072	9.99714	8.45165
Rpl7a	810.662	254.923	169.529	106.127
Rapgef3	7.68742	54.1118	43.8719	129.749
Tmem176b	49.7231	79.712	359.035	300.337
Haspin	17.864	0	0	0.00325
Dusp6	13.3708	0	19.9088	71.0489
Fam163a	0	8.84732	8.0352	21.6705
Stx1a	3.13629	0	0	10.7986
Itih3	19.9944	119.786	157.295	189.868
Pfkp	4.87313	9.44368	63.6511	123.239
Cct7	319.33	119.7	75.0074	79.6547
Lig1	95.0825	4.16904	2.46737	0.0463
Mrpl52	246.693	154.019	78.8283	44.3469
Atp1a2	97.5617	319.213	788.902	855.834
Tcn2	11.5448	50.8412	147.037	103.101
Zwilch	56.3318	0.0384	3.33714	0.011
Rpl8	1129.92	241.719	178.286	92.1538
Fas	1.53461	0.46504	3.77963	11.4446
Mettl11b	3.26542	18.2203	15.8385	0.7977
Tdp2	54.6311	14.7504	14.5093	11.2184
Tgif2	70.1944	11.2693	1.41909	0
Ash2l	81.9138	19.2294	22.3592	10.5788
Phyh	66.1234	210.368	204.733	182.221
Arhgap19	19.2681	0	0	0
E2f1	22.3345	0.05624	0.160771	0.0522
Oat	111.655	587.08	333.758	213.304
Bcan	80.582	413.623	1111.08	1074.9
Tmem67	4.07574	26.8566	17.4711	2.43705
Hspb6	36.2335	186.22	17.4745	4.57965
Etnppl	0.0368065	30.8627	81.2528	104.566
Anapc11	110.438	66.7438	34.3807	28.3419
Lyar	82.1647	5.68316	12.5767	0.0187
Dop1b	1.21881	6.85068	9.15329	14.5643
Alkbh7	28.8038	76.1966	57.5431	71.785
Srsf7	263.114	95.6688	94.4822	43.8912
Pgap4	14.6228	43.4091	72.6184	74.4694
Acbd4	0.849677	34.7906	25.296	21.8596
Tnik	4.58548	24.8578	82.5438	186.002
Fbxw17	11.5949	0.83292	0	9.91545
Orai3	5.1309	29.4973	36.7349	38.7227
Lama2	11.8391	28.3363	77.5419	18.9196
Dtl	57.8303	0.00876	0.140171	0.01435
Lcmt1	83.6397	49.0098	30.2325	5.13055
Cct3	527.452	235.255	111.539	178.112
Tbcc	33.3183	13.1608	6.64611	0.00325
Gemin2	29.2635	0.06792	2.88446	14.3317
Plp2	142.689	149.475	35.6924	13.2267
Serf1	89.6016	52.9474	17.3039	4.2453
Hspb8	8.88139	8.06584	37.7041	64.0517
Ncan	60.8362	51.8901	133.56	203.592
Serinc2	37.6889	17.9642	0.188029	0.02585
Ddah2	188.247	109.505	56.0494	43.1266
Nme1	134.604	38.011	29.2366	26.2804
A730008H23Rik	124.905	30.2657	31.28	35.6391
Nkx6-2	1.3259	11.1621	18.9915	0
Gm26533	4.64129	12.9362	17.1046	2.0216
Taf6l	56.5145	77.8651	122.909	21.774
Dbndd2	9.06035	37.3662	142.17	121.271
Snrpb2	72.4193	27.2721	18.7925	12.0639
Polr2i	121.244	44.1762	45.2157	32.1745
Ssna1	203.659	98.1776	31.6593	44.0624
Abhd14b	8.21829	148.58	112.26	152.366
Tmsb4x	3803.38	488.627	131.602	78.8524
Zscan12	15.5373	4.6478	14.5486	0
Adprs	58.2233	21.6039	17.1083	3.8901
Mad1l1	22.2623	11.8476	1.7926	0.0033
Zc3h15	124.659	28.4854	40.5339	40.6615
H2ax	285.299	26.0334	4.89657	17.3974
Phgdh	624.166	1245.74	735.552	342.898
Epb41	29.3208	2.63844	2.2464	0.0044
Mrpl20	163.455	65.1129	57.7558	40.8329
Acaa1a	59.3846	211.562	107.563	218.673
Ube2e3	108.997	44.9383	36.0718	29.4549
Csgalnact1	2.62003	12.3247	41.252	65.9524
Brinp3	0	1.51672	4.88683	45.7932
Gpm6a	121.556	726.958	1484.54	946.005
Dhx15	102.429	32.0574	29.2028	28.8023
Gsta4	30.5855	222.031	130.468	58.2831
Denr	88.5451	11.5848	19.0639	9.231
Fbxo44	28.5263	87.7371	128.22	158.461
Tecr	392.177	520.557	866.759	630.251
Sfr1	183.355	103.757	80.6044	40.2381
Scfd2	24.5435	3.14528	2.24149	22.8368
Cops8	112.524	41.4982	62.9962	5.55815
Usp2	8.39045	52.6781	90.9464	76.2302
Mki67	66.7477	0.00148	0.00225714	0.0165
Cd63	415.069	912.726	1409.38	1020.03
4930503L19Rik	23.8993	0.00452	5.56551	0.0047
Faf1	38.6438	10.5259	10.334	5.6627
Rabggta	10.7235	11.5263	24.3641	46.6439
Spata13	25.9007	1.91348	1.01477	0.01635
Mrps27	28.6971	4.55956	6.18794	12.3166
Mdm1	17.1872	0.53872	1.96726	0.006
Rida	48.3181	127.68	235.761	106.953
Idua	11.1596	29.6332	55.7235	72.7104
Lrrc4c	0	0.0028	9.10117	10.0968
Sat2	8.37226	46.751	25.7226	42.4732
Mroh7	0	7.33372	6.94951	23.9123
Dctd	24.1288	0.07052	8.51331	19.8837
Mcm4	92.4116	19.023	10.0091	3.7943
Ikbip	30.9372	54.2015	91.7268	88.904
Cyp39a1	49.3287	18.3139	3.31926	0.0209
4932438A13Rik	22.6642	19.2974	14.3879	62.5851
Yrdc	41.0687	2.9018	7.01194	9.8777
Mettl9	156.867	85.1328	61.528	31.4605
Prkca	0.0873226	20.44	6.49217	1.14355
Copz2	17.2769	51.3827	47.1302	0.4671
Smyd5	16.2955	0	1.2918	8.26075
Scrg1	8.02419	192.615	559.116	147.103
Gnai3	124.721	70.8872	39.6611	15.9975
Rbx1	176.111	68.4276	65.1684	56.1874
Uxt	82.9421	26.5964	20.9843	16.6184
Tubg1	119.362	34.4953	31.2845	6.81825
Ptchd4	0	0	0	17.8438
Tmem14c	151.612	74.0354	174.14	41.8231
Gspt1	70.1901	7.01784	17.6079	11.2625
Clu	52.2883	8912.75	9879.74	6611.79
Rps12-ps3	338.675	96.9626	47.8665	31.9435
Smarca4	48.1417	19.0292	7.75477	6.50275
Caps2	2.94484	5.11824	7.90503	31.5788
Gm10275	368.313	141.272	36.2563	17.7223
Men1	48.5106	13.8123	9.958	2.5192
Knstrn	241.067	0.84808	0.603543	0.28625
Ccna2	380.95	1.16556	0.655914	5.26715
Snrpg	936.887	227.667	141.513	53.4981
Tacc3	217.146	4.30192	4.80777	3.5696
Hgsnat	7.07316	32.2056	41.8227	58.882
Tagln3	80.4157	98.8933	204.284	537.869
Smim43	15.4961	0	0.00597143	0.007
Asns	42.3923	0	0.00905714	0.00345
Prr5	3.41442	16.3886	33.085	16.077
Fan1	2.28984	4.85796	4.37666	27.1096
Btg2	240.084	51.8514	6.56889	6.56655
Drp2	0	7.15212	8.54646	13.1625
Lsm2	211.333	9.66336	9.60503	0.3752
Sil1	41.483	66.5788	98.3309	87.9723
Tex10	35.7792	0.01284	6.64729	15.2934
Pif1	25.5368	0	0	0
Pom121	11.9662	1.75144	0.877314	0.8169
Tulp3	14.7699	5.12712	16.7	54.7514
Kif4	30.8914	0.06004	0.00985714	0.062
Kif23	78.7296	0.00592	0.00154286	0.0149
Kdm2b	20.8224	4.16704	6.62783	0.78155
Rpp40	22.8982	0.00516	12.8887	0.01835
Rpl34	904.322	341.88	216.764	97.1508
Cd2bp2	41.6951	4.42036	7.53346	15.4637
Kdsr	6.9949	20.9727	25.0374	24.744
Amy1	3.38839	8.1702	25.1421	31.7106
Mrpl18	127.974	43.0637	34.4288	69.7938
Riiad1	10.1824	83.0737	55.923	8.0485
Psmc4	239.506	78.2848	97.6842	121.294
Ppp2r3c	40.0882	2.88168	16.6278	14.6049
Llph	85.711	21.7555	12.5861	28.1367
Emp2	22.3843	99.5924	46.2537	17.2376
Sf3b3	99.8393	20.9062	11.0632	18.4414
Birc5	311.022	0.01232	0.091	0.15525
Sptbn1	9.27326	37.8388	52.1474	28.4252
Mgll	5.97077	161.29	258.952	597.647
Slc8b1	2.37603	33.9461	58.3949	39.9635
Rpl36	787.97	360.843	200.144	182.49
Pak3	136.58	4.56844	2.16434	0.01245
Elf2	33.5097	4.81096	0.682829	3.61925
Itfg1	51.0531	80.8967	125.401	92.2549
Abhd6	25.7437	65.641	117.789	117.094
Srp9	104.848	93.6204	45.2424	21.1381
Ubxn11	2.9481	27.392	9.81231	1.01095
Cenps	34.6019	0.03008	0	0.0138
Spaca6	1.09106	35.3884	44.1414	96.8228
Khk	4.8191	33.7508	21.4997	19.8512
Polr2d	126.618	49.8501	48.1455	22.624
Mfap3l	0.618258	5.08276	27.0839	36.3672
Socs3	19.4646	5.36808	0	2.671
1700019D03Rik	0.0875161	15.6732	21.8495	9.24385
Ska2	69.27	26.5211	8.66743	5.76875
Cfl1	1172.37	549.183	553.488	354.329
Rps12	109.515	49.0859	16.7121	3.7357
Cyp2j9	45.274	107.414	278.131	214.127
Parp1	92.23	8.79804	6.2568	17.6147
Creg1	33.8889	100.489	179.865	74.6512
Ptcd2	42.9128	12.1327	10.6043	22.8088
Ppp2r5a	29.8686	54.021	83.8529	77.1688
Lcat	2.74719	28.033	213.201	618.623
Dtnbp1	11.9097	18.4963	6.3234	2.1263
Ifit3	0	12.0606	15.0305	31.8057
Scd2	185.589	482.456	437.861	359.963
Psap	101.6	440.288	483.407	426.514
Lgals3	10.8292	68.7352	0.651829	0
Calr3	11.9929	0.13756	19.9691	0.7419
Rps27rt	1486.79	930.533	324.36	208.417
Slc22a17	41.3254	122.355	155.572	64.0468
Npdc1	85.7008	220.343	205.962	105.968
Hbegf	3.33784	6.74536	41.8733	53.715
Grwd1	21.7376	0	7.39417	8.16085
Nxt1	96.0515	0.08896	18.4017	10.6321
Pex16	12.1035	19.7414	29.4833	49.1865
Tk1	112.257	3.85704	0.0498286	0.2296
Kcne1l	142.8	119.811	43.7355	7.9971
Pcdhga12	1.42471	5.94224	3.96091	19.1779
Ncbp2	128.084	63.9446	36.1075	43.0641
Tle2	0.00209677	4.54148	20.4099	65.864
Hrh1	0.00187097	2.91192	67.3471	68.8551
Rars	112.026	39.6928	26.19	29.6224
Hacl1	13.3245	43.3027	36.8571	17.1745
Pcdhgc5	0.0759677	4.70688	11.2593	17.9789
Utp14b	1.27226	12.6238	9.53497	14.5625
Slc41a1	9.14426	17.1303	54.2368	76.1536
Myo1b	20.0461	0.10816	0.0370286	0.11135
Arap1	6.74203	7.59	14.494	40.181
Tuba1c	88.6943	0.03268	0.0266286	0.0041
Pxmp2	49.6925	91.597	108.322	45.4263
Mfap4	39.1439	0	0	0
Snrnp25	75.6017	20.9612	11.2928	5.43615
Acer3	2.11571	5.47428	12.1429	17.5946
Man2c1os	0.0411935	0	2.24269	10.9117
Rcc1	99.6932	9.34184	5.26426	2.74125
Reep5	69.5728	264.519	184.854	115.588
Ptp4a2	149.607	53.8491	26.9319	39.1609
Lpcat3	41.2815	80.1338	101.35	119.798
Fam214b	3.37316	13.5116	24.2471	17.6394
Nme3	49.6004	106.605	82.828	43.1617
Tfam	46.1931	24.5537	17.8838	6.1953
Vamp8	4.80984	25.0434	25.4062	25.3703
Nop56	365.541	46.5621	75.6012	81.8919
F3	43.6503	382.02	1029.21	999.397
Ifngr1	17.4768	33.2178	44.1171	60.8444
Mcm10	22.2282	0	1.72146	0.01395
Tcf3	101.923	25.5402	12.419	1.03125
Naprt	12.2586	37.2956	51.3166	47.3266
Srrt	43.8277	19.6547	1.5738	9.1852
Rpl17	515.427	178.815	87.3845	57.668
Tceal9	190.136	119.094	34.5645	27.0678
Polr2f	249.632	143.442	86.6352	55.985
Notum	53.2647	44.9777	0	0
Ckap2l	117.425	0.00732	0.00254286	0.04345
Srfbp1	26.2466	14.1616	2.34191	3.6623
Otx2	14.2819	28.6051	0.00482857	0
Rbm8a	92.5901	43.8921	18.7876	20.5692
Slc16a6	32.2361	0.33152	1.58537	0
Flywch1	35.2086	20.0825	15.1292	2.8011
Gnai1	10.6765	0.0116	0.00454286	0.00275
Nudcd1	23.2173	2.64088	3.31963	0.08665
Rae1	121.316	58.162	25.4829	47.9814
Rpl28	491.169	171.043	128.685	79.4334
Cpq	19.4045	39.8079	96.6133	157.914
Aprt	132.319	69.3409	41.4911	47.1499
Hmces	22.0106	0	4.69103	7.9
Hp1bp3	147.933	71.3273	44.8326	47.1609
Slc46a1	10.4338	36.464	70.2202	54.9232
Bccip	134.069	53.0485	32.1717	22.9295
Naaa	6.36413	166.978	336.516	286.285
Atp6ap1	75.139	205.407	179.697	102.395
Fbxl2	19.8015	9.8872	0	0.1157
Tsg101	128.773	42.6067	50.9012	33.2253
Gm17971	6.69519	0.14284	1.50551	26.4499
Rps23-ps1	984.454	462.152	216.235	147.245
Isoc1	32.7742	15.0916	3.42663	2.35065
Clic4	115.984	34.0417	11.0296	26.4137
Pidd1	8.38735	0	0	0.01715
Pde1b	29.515	84.3976	4.59546	0
Ankrd23	4.08	0	6.78383	14.5016
Cd9	447.872	722.434	587.829	177.064
Psip1	237.221	67.7283	21.024	14.3349
Etv5	58.6932	7.4806	42.7101	86.0603
Rpl29	697.736	151.415	94.5451	91.1894
Efcab14	46.0358	164.345	59.9027	43.5577
Atp5e	714.994	368.231	301.156	179.303
Wls	7.18903	23.789	141.371	141.149
Ssh3	0.530774	11.1702	2.03863	11.1835
Sf3b5	35.0249	8.27272	5.07917	14.1996
Prex1	6.218	17.3129	44.9643	82.2784
Ppdpf	347.321	165.101	101.548	99.3324
Slc3a2	175.06	74.365	348.38	353.555
Paip2	295.651	185.404	136.497	80.5446
Rsl24d1	106.093	46.2591	18.0911	32.1852
Tead2	46.8953	14.1271	0.919743	0.00925
Eme1	16.5757	0.32392	0.00754286	0.0028
Npm1	974.176	249.205	83.7503	64.1381
Leng8	23.4635	62.0846	71.3581	125.91
Rad17	30.8213	14.9762	10.1791	0.58695
Syncrip	105.236	20.9374	9.49957	18.7508
Psmb7	336.101	110.848	130.938	76.5806
Enpp5	24.6941	69.3928	99.9165	39.8816
Pggt1b	23.3617	4.09788	2.25563	11.395
Fxyd1	55.7899	1168.57	494.744	196.462
Trib2	17.1316	8.54412	30.3497	70.6312
Tmem175	12.138	55.6116	99.8214	32.1373
Rcn3	61.8693	113.237	28.3807	0
Dck	62.2986	6.94856	6.3506	9.9604
Dner	24.9541	22.5919	39.8274	84.6299
Cct8	483.253	164.505	96.7687	86.2849
Paqr4	10.6994	45.6874	85.5423	77.4658
Oscp1	27.2622	85.4197	72.7591	30.0073
Nup210	23.7159	1.5684	0.5646	0.0026
Vcl	0.392484	20.6019	42.0318	39.6414
Asf1a	96.1631	37.2487	11.9327	16.7189
Apool	67.9098	20.5664	13.8457	12.0562
Arpp19	175.326	61.2218	66.6957	69.9153
Micu2	41.4741	11.8189	16.8999	0.0664
Cks1b	336.213	2.94496	4.93426	0.07755
Nudt21	72.025	12.9121	21.2094	11.5942
Ttyh1	91.7403	510.933	779.755	539.694
Ube2d3	365.286	180.451	128.977	93.4243
Ephx4	8.27394	58.5705	0.0127143	0
Dazap2	234.929	457.807	452.268	209.47
Sapcd2	51.8984	0	2.79843	0.00315
Srsf10	189.975	67.5147	52.2177	82.833
Gm14322	31.3306	5.59128	4.8956	18.2122
Mesd	69.4229	36.1753	31.5435	12.7267
Gm5083	0	9.13176	6.51929	0.05035
Ndufc2	800.514	276.524	393.849	411.351
Gtf2h5	159.855	90.1668	31.869	60.9681
Nop58	279.814	7.5174	4.81434	8.9529
Rora	11.5452	39.6978	62.6163	35.8552
Cse1l	117.596	37.3106	40.7296	27.3969
Rmnd1	40.3605	30.7207	47.4154	116.256
Nat1	0	0	21.0762	21.9197
Ints7	49.5358	7.24956	0.0168286	12.6058
Ppp1r3c	26.2028	91.561	119.827	109.534
Dolk	12.7357	21.2217	52.2163	14.6316
Ddx54	23.6687	3.09224	5.6302	5.36185
Ubfd1	34.0877	14.7128	15.7979	4.741
Rrbp1	12.9558	18.9306	43.0204	58.318
Casp7	30.511	0.004	3.84826	5.66975
Atp1b2	101.389	576.322	1940.05	1490.02
Cct5	421.539	133.514	136.885	120.545
Bap1	59.1327	14.4287	16.8588	23.9061
Zfp383	0.107194	5.24096	3.49583	13.6215
Slbp	260.646	15.294	20.8506	13.5944
Wdr76	11.3923	0.24572	0.621143	4.92625
Dok5	9.06752	53.3247	25.114	15.2243
Taok3	3.88877	12.2164	10.4037	23.5472
Eif3f	158.403	43.7219	42.4773	34.8327
Tfdp1	135.243	5.95176	14.8435	15.1143
Bub3	233.848	57.6082	47.4892	36.5683
Plpp1	0.453968	20.8288	65.6402	15.7868
Abhd3	9.78216	75.8709	514.895	455.719
Baz1a	15.6593	0	0.00788571	0.03815
Aldh2	76.6442	205.504	130.827	99.8287
Fam20a	0.00641935	16.6381	149.015	174.367
2410006H16Rik	184.074	60.9731	23.4693	46.2941
Igfbp2	6.4879	0	9.29474	151.277
Chtop	197.035	62.7532	52.2951	44.0262
Rpl14	773.408	280.925	89.1222	102.5
Nans	38.6555	9.85456	0.0996857	3.74845
Plch1	11.7226	2.6434	0	0.0202
Ppan	50.9917	22.3999	7.73386	2.48365
Iqgap3	17.4551	0.32732	0.478486	0.9264
Set	277.284	101.098	37.9139	26.149
Per3	16.0271	28.3948	75.9221	112.533
Hnrnpu	83.6957	15.4752	15.5045	34.0317
Mphosph9	23.7308	2.82696	1.53577	0.65355
Cyp4f13	9.62013	44.1904	64.7328	85.5061
Espl1	15.9111	0	0.729057	0.45035
Adra1a	0	0.67828	8.66831	27.0412
Dlg4	1.72616	8.84816	7.49914	30.6066
E2f7	17.2176	0.0398	1.30831	0.0863
Mtrfr	39.2276	11.439	6.52643	25.3105
H2ac24	4239.93	20.8048	12.2399	8.17
Naa50	104.543	28.7266	14.1575	5.5663
Cdca7	232.051	15.9895	5.3414	0.279
Pnpla7	7.35903	17.8341	48.2771	54.6898
Exosc9	213.003	52.4068	20.2323	26.8267
Capsl	0	37.2304	3.01726	0.2953
Slitrk2	4.31206	10.2398	30.7187	54.1308
Mok	13.7233	30.2565	5.33763	0.0905
Tmpo	167.133	21.701	6.76209	7.0227
Mapkapk2	17.3538	1.59696	3.31263	0
Snrnp70	81.7043	14.1619	17.542	28.6733
Ddx11	9.04332	0.05512	0.863486	0.00545
Snhg6	99.9515	27.485	33.0975	41.815
Phkg1	2.85148	65.0813	115.787	79.6964
Msrb2	17.3757	38.7806	18.8173	7.2623
Nedd8	386.208	135.293	103.175	99.6727
Ctps	87.6448	3.85328	8.71126	2.38555
Gsg1l	0	6.49588	5.77206	0
Ppp2r2b	43.2224	104.571	93.0876	46.9331
H2ac8	171.263	2.86444	0.0186286	0
Lyplal1	9.56639	0	0	10.0698
Mpv17l	1.62903	7.0862	25.6218	48.7619
Gaa	35.5126	130.073	132.808	111.861
Cops6	207.253	116.453	53.3999	104.761
Eef1d	252.592	200.959	110.987	46.6005
Gabrg1	5.62529	23.5418	96.2415	93.7479
Park7	432.497	270.748	129.586	149.987
Tspan33	4.72861	23.0352	4.44091	0.01095
Arhgap18	10.6597	6.20524	3.2474	33.2308
2310057M21Rik	10.2017	0	0.8884	10.3155
Col4a5	0.705419	6.56552	5.07843	0.28685
H1f0	262.365	163.808	60.7411	36.8612
Aldh3a2	30.2643	18.73	12.6257	56.2054
Adh5	335.851	129.962	110.627	110.585
Nav2	2.70184	11.0101	13.4919	32.7629
Cdc25a	17.6061	1.55596	1.72283	2.806
Car3	16.9044	0	0	0
Fbxo2	11.4155	219.613	164.365	65.7745
Sfrp1	70.9392	133.565	10.8635	11.0952
Cox6b2	22.8088	68.3136	13.4321	8.4891
Snx32	6.28113	39.1839	45.1871	59.3835
Anapc5	185.483	121.885	47.6924	26.596
Drosha	20.8866	12.6408	8.57094	0.18
Rgs16	34.6265	0.9862	0.0042	0.1097
Sinhcaf	105.682	10.9012	6.07443	0.31015
Eloc	134.44	37.9477	34.8608	100.996
Gm20604	20.9147	6.80484	6.01766	1.09315
Ppp1cb	61.6379	23.9335	13.57	18.4206
Steap3	4.60665	6.14828	28.3271	77.4111
Armc3	0	15.1112	0	0
Rfc3	184.109	9.54544	0.318743	15.8986
Itga6	2.6269	8.00432	37.0965	56.7156
Mad2l2	100.127	71.2282	40.0685	16.291
Ccz1	57.8935	13.0647	28.7074	9.8156
Atp13a4	0	4.29536	47.9019	118.637
Rpl36a	731.504	244.544	106.351	95.5343
B2m	47.7257	108.442	182.588	57.1215
Plxdc2	0	11.6611	6.87843	29.0471
Sema4b	4.12139	7.7888	40.9597	63.109
Macroh2a2	60.9608	4.71584	3.13054	6.6266
Maob	26.6688	126.814	155.565	124.515
Pdia5	10.5037	0	1.04834	0
Eps15	31.341	65.3116	72.4021	98.957
Rpl13	1993.95	671.567	257.953	223.211
Ucp3	0.00222581	0.00716	12.683	26.2774
Cdk1	440.816	0.062	0.0639143	0.18915
Top1	71.531	15.7784	20.2144	13.6267
BC004004	48.603	95.5591	110.356	48.2867
Farp1	5.37448	32.8213	46.1365	68.8234
Egr1	750.076	7.7224	3.69091	0.07995
Trf	8.63632	0.17956	0.333771	0.01365
Tst	93.9626	220.641	437.03	468.808
Gale	3.63671	39.3768	55.1257	34.7916
Aldh1a1	2.81332	3.8842	20.4763	26.9181
Rpl31	674.12	252.961	203.421	107.756
Morn1	21.1505	42.4864	7.29023	0
Cdk4	979.882	183.71	93.2884	65.2458
Mettl7a1	0.00870968	23.3578	30.4355	2.5789
Sfpq	78.5858	11.4626	36.3712	12.3496
Rab30	4.55477	7.6782	25.9193	58.4671
Tcerg1	43.0154	11.1307	7.18137	5.1318
Nbl1	94.5443	16.7627	5.09266	10.7638
Ccnb1	393.458	0.01844	10.5477	0.10495
Prxl2a	32.8951	358.898	433.277	246.588
Sh3kbp1	6.54055	23.9665	15.6211	1.61745
Acsl3	71.0613	422.506	888.271	483.956
Timm50	182.705	47.4177	22.2569	34.2799
Gpc6	7.96081	4.67808	45.1717	33.6099
Plaat3	23.8034	95.1086	121.832	40.9353
Tlr3	2.27126	6.72708	63.5388	42.7118
Chek1	56.5633	0	1.88563	0.0044
Sco2	11.7456	9.58796	25.9669	61.7852
Cenpw	51.5718	0	0.763286	5.38175
Cnih2	26.6832	2.21252	0	0.5344
Rps27	154.074	69.6231	25.7227	8.84115
Phtf1os	0.0570645	1.27208	4.16206	13.3076
Tyms	151.091	23.1502	2.77803	17.0825
Yeats4	68.6785	5.50312	5.97297	13.5142
Rrp1	157.93	89.5724	34.283	54.7649
Gpsm1	14.7909	0	10.6953	29.755
Fpgs	30.3675	4.61088	6.1862	18.8708
Nudt1	33.0746	0	12.478	6.60785
Tmem41a	24.2313	10.0615	7.30223	0
2410002F23Rik	181.962	89.5171	42.9643	28.0114
Nop2	35.112	15.753	4.73111	1.05815
Lta4h	132.698	47.3746	29.7504	39.2946
Nup88	110.658	36.9904	33.9641	78.4989
Rpl10a-ps1	97.2065	51.3781	18.4126	7.27925
Adhfe1	48.055	149.446	214.781	103.21
Mpc1	252.489	416.477	503.63	262.251
Eif3b	69.5049	15.5509	15.9982	8.8303
Rnf187	331.283	161.654	92.8669	87.0905
Chpf	6.34716	17.6379	35.2734	19.8898
Pdap1	39.9618	15.1038	12.3992	6.5302
Pfdn1	109.532	22.6683	44.732	36.1728
Ncaph2	110.828	23.9141	22.418	27.8937
Rnf215	16.3157	35.4142	100.873	65.1602
Lrrc40	49.9256	16.3357	3.19203	7.09075
Gtf2e1	60.254	8.1158	12.6396	5.14365
Hbs1l	57.8128	13.3055	34.6239	10.4073
Nprl3	18.196	21.7558	15.2705	65.1894
Tha1	10.2292	3.07176	0	18.4137
G3bp1	98.1063	25.1125	8.8996	17.7054
Rhof	0	14.3488	18.3475	0.21435
Aplp2	84.1311	202.52	173.061	131.076
Sirt4	20.6848	2.69624	10.8197	40.3879
Hprt	100.69	20.0292	3.90669	13.8846
Tnfaip2	0.497129	8.99228	8.60566	31.833
Ripor2	0.0257742	0.0234	1.66391	12.5824
Psmb5	307.242	132.577	123.654	154.51
Mt1	460.617	2979.58	3846.57	3220.3
Rpl7l1	79.0254	28.2389	20.3154	19.6309
Pygb	76.7467	362.062	260.679	272.591
Fbln2	38.7694	39.155	0	2.5419
Ebag9	23.0943	2.3642	9.81094	0.0122
Htra1	32.3425	513.679	3087.22	3265.77
Zfp467	3.20971	38.5734	38.9952	54.8598
Sned1	1.35535	1.54324	2.70923	24.9191
Bok	42.6227	0	4.8796	0
Rab34	71.7873	110.423	80.6603	163.783
Ncapg2	20.9087	0.001	0.00262857	0.00255
Haus5	61.3181	0.00696	11.3351	6.07055
Hnrnpa0	37.795	19.8453	6.6028	3.74085
Eif2s3x	72.1689	32.931	22.3258	8.28595
Ccsap	8.97929	0.02468	0	0.0055
Zfp954	14.2035	8.38048	14.3031	0.0066
Csdc2	37.6054	234.474	202.279	183.225
Neat1	8.75432	73.3001	53.7617	159.464
Dync1li1	43.7623	9.65412	13.2143	8.79535
Rps25	761.802	283.048	146.8	104.15
Trit1	12.8537	1.15528	0.0108286	11.211
Ruvbl2	136.526	55.2954	17.5539	31.1374
Mgat4b	15.3329	11.7465	19.0336	0.0311
Arhgef26	16.0536	19.0456	43.0264	70.0666
Dut	384.741	25.3059	18.1744	11.301
Emid1	2.64145	0.46208	5.34534	30.3716
Emg1	208.471	144.866	62.6702	36.5521
Rhno1	88.0191	27.5075	7.01254	27.5114
Septin11	48.4203	14.9754	13.3343	14.0662
Dleu7	21.887	2.27568	0	0.01075
Rack1	474.772	96.6398	60.9818	101.738
Ccm2	50.1954	12.7436	9.81394	5.96995
Naa25	26.1078	2.68068	20.0857	2.54615
Lgals4	6.02723	24.8114	10.8737	51.2553
Zmynd19	10.4629	1.77476	0.0718571	0.05715
Calm2	1096.2	225.485	159.635	101.171
Marcksl1	514.79	58.6263	16.9971	3.1795
Nat8f1	15.836	142.604	264.411	238.686
Ankrd6	56.5222	52.6369	9.83426	8.58765
Arap2	7.65684	47.1056	14.9014	14.8959
Mansc1	0.39071	4.00164	8.55077	12.236
Fgf1	0.00158065	29.6632	39.4105	44.5183
Ptms	77.4433	67.0438	50.5669	12.5087
Dipk1c	13.5289	55.9732	46.8569	40.0465
Dbf4	42.3816	2.63984	4.14897	5.72985
Pmp22	69.1258	25.6623	109.549	176.271
Ciao2b	50.7353	14.4206	10.5352	11.496
Nwd1	3.49342	12.9293	49.7704	120.426
Rarres1	0	4.48492	24.8514	12.5959
Elavl2	17.4573	0.00556	0.0250571	0.00245
Chst10	10.2875	13.3683	108.492	77.3174
Mapk15	0	19.9935	0	0
Gfap	11.1603	822.712	56.4076	5.3111
Tprkb	51.1348	194.046	394.599	209.991
Elavl4	69.2936	1.67036	0	7.05
Fbxo6	5.67845	62.2948	22.2903	28.2084
Klf9	5.77139	27.1824	35.4689	22.1053
Bag1	191.607	74.6943	37.1319	3.867
Pnkd	56.5512	57.6068	113.343	155.485
Paxx	28.3575	81.1645	151.534	104.731
Gm4294	45.2079	12.7079	7.71814	3.7763
Psmc1	278.15	48.256	55.4483	125.176
Atg16l2	25.6677	28.7416	10.4248	82.9776
Actg1	2226.19	1119.35	867.171	704.268
Spry2	87.2822	48.8768	81.0549	240.824
Camk2g	12.7825	20.8952	82.8457	84.9821
Mmachc	62.4509	19.6122	9.46737	33.2272
Tspan3	468.047	965.285	955.838	534.977
Larp7	55.6657	18.4796	6.69591	0.0188
Slc2a10	3.01777	18.3106	28.2047	25.9399
St6galnac5	1.50981	6.79544	16.5101	40.1739
Acad10	1.95242	0.07116	2.60014	14.0396
Eogt	2.64752	2.6792	12.2403	43.1749
Sec61b	283.663	190.475	61.1633	87.0419
Tmem218	27.7528	72.5281	98.447	56.5451
Gmcl1	26.7837	9.26048	2.48286	4.19465
Ciz1	25.523	7.08444	5.11837	42.5418
Tsfm	69.0985	15.7669	14.6775	0.90765
Snrnp35	17.3506	4.57332	0	1.43235
Etv4	5.48565	3.09388	22.0972	43.7426
Shcbp1	99.482	0.513	0.00871429	0.03485
0610010K14Rik	247.319	44.737	52.113	35.7899
Ccnb2	133.127	0	0.00497143	3.1528
Me3	53.5555	35.985	0.706371	5.13585
Wfs1	3.89942	3.83208	24.0108	35.162
Lmnb1	71.8475	3.254	3.84914	0.02085
Dhcr7	34.6511	46.444	143.588	160.133
Fxyd3	0.262935	11.6951	25.9358	10.1375
Jup	2.88706	16.5404	34.6139	35.0853
Lef1	2.37729	0.00668	2.87326	15.6454
Mettl14	35.4877	5.17456	2.67671	10.0109
Bcl11a	20.7759	4.0364	0	0.0301
Tuba1a	2766.61	1576.97	567.2	144.723
Gsn	14.7512	231.393	25.7396	25.9492
Tgif1	32.9137	13.8937	1.05463	0
Smarca5	42.5459	13.9582	8.20429	5.98785
Fos	987.343	200.964	8.1776	0.5724
BC055324	15.1126	0	0	0
Scg3	126.819	556.961	1371.04	715.889
2900052N01Rik	0.00722581	27.838	74.4946	28.3514
Gprc5b	4.69374	24.3968	39.4022	30.2951
H3f3b	1731.46	236.103	247.28	130.822
Urm1	3.57013	8.53508	3.29929	11.6504
Abcf1	53.7406	21.2873	8.13931	29.6091
Tagap1	27.5848	5.95336	5.7712	10.4178
Lxn	61.7556	170.756	395.412	197.845
Ftsj3	45.6225	15.3578	11.6494	1.06245
Hey1	13.5249	42.79	35.3511	49.1641
Zeb1	86.3144	22.9739	37.685	81.2027
Aspm	13.7212	0.00072	0.594114	0.00325
Nipsnap1	22.1189	14.1638	0.00425714	0
Sez6	115.049	29.9013	4.40349	1.2221
Phb2	242.495	46.1592	50.0883	52.2961
Smc6	35.4963	6.56964	7.57051	11.6707
Api5	101.244	50.0412	28.0734	36.9036
Mecr	56.8182	15.2046	10.4803	4.954
Rpa3	122.726	23.1966	31.5383	10.6813
Snrpe	746.214	186.734	143.406	44.2108
Papola	109.607	75.3386	50.3501	19.2663
Insr	30.6992	24.2876	41.008	82.4294
Tex264	14.8248	44.2848	135.292	109.318
Acadl	36.6154	132.024	142.824	143.356
Stat3	5.54074	29.8528	27.8104	49.5183
Aox1	0.00177419	1.2784	11.7597	11.1137
Npr2	3.42371	32.1647	41.8375	13.1209
S100a6	39.5514	846.08	207.538	62.2715
Snd1	27.0166	7.72996	5.64749	24.1179
Echdc3	0	3.90408	4.41929	19.4984
Spag9	41.11	40.2468	66.6972	115.42
Ncapd2	137.268	5.31324	5.46637	7.13395
Pms1	13.1273	0.46076	0	4.6822
Snhg20	64.9653	229.371	146.559	222.022
Cenpp	69.2612	0.0056	4.50049	7.0823
Vopp1	25.2788	24.3484	6.5126	0.0191
Vim	133.722	398.375	45.8012	15.147
Rps26	1383.98	367.183	128.74	103.759
Tmem100	13.8698	72.5302	145.123	62.4245
Aif1l	104.273	68.7782	23.8241	6.6385
Snx5	156.028	135.582	95.6531	32.8697
Prpsap2	50.2007	24.8244	18.4089	7.2089
Acox1	33.3267	102.71	99.1727	68.9548
Kif20a	79.0901	0.04048	0.375743	0.07135
H2ac20	24.8545	1.2412	0.0143143	0
Gm14207	23.0987	0	0	0
Slc39a12	0.280839	54.0391	564.838	476.34
Uba2	141.221	52.8529	7.42291	13.8614
Ptp4a1	266.885	61.9371	60.9643	40.1976
Cep57l1	39.5064	4.0414	10.4303	3.82335
Rpl37	300.753	138.383	57.5709	47.3002
Trim27	72.3645	12.8138	7.3412	1.08195
Ttll4	21.8197	4.64612	3.29823	9.6216
Lingo1	1.52306	14.162	6.37297	0
Dhrs3	24.9435	10.2585	121.826	258.866
Tmem258	205.43	76.3248	112.253	52.2323
Ran	822.188	114.846	84.7777	51.483
Vit	11.4392	29.6391	9.63877	0
Hlf	1.71161	3.90012	22.3878	12.2415
Sfxn5	65.3866	385.655	287.865	406.534
Prkcd	2.67335	12.374	17.802	21.9366
Rps18-ps4	18.7333	5.06764	2.03197	1.2634
Fam214a	26.5411	2.4698	9.78163	36.6161
Endog	10.5277	27.3301	36.6411	25.0888
Xab2	41.7153	28.253	24.1719	4.01035
Pygm	3.3611	3.0254	36.4992	72.9793
Psma7	484.965	257.223	163.334	174.964
Siae	16.5395	52.5229	41.522	1.29985
Ccdc141	13.4942	11.2042	51.2668	126.91
Timeless	73.3573	4.376	8.74117	8.23385
Rasal2	10.3736	1.46732	13.8759	34.888
Faap100	23.1446	14.3582	4.16603	2.21125
Slc49a4	1.76939	6.92832	47.3001	25.476
Srsf6	248.002	46.2969	43.0158	38.0958
Nubp1	33.9691	12.3629	6.0112	2.0733
Glrx5	82.2548	28.9472	10.0984	11.6027
Aurka	173.771	6.85784	0.00305714	0.0135
Rpl22	324.59	84.9276	70.4864	54.0817
Mad2l1	187.018	3.52812	13.8147	0.06115
Elovl5	109.949	176.998	484.674	448.71
Ctnnb1	258.37	64.7882	45.457	19.8135
Rps7-ps3	144.481	27.0164	21.2088	15.5204
S100a13	31.7574	165.928	174.584	126.176
Snhg3	48.6207	123.372	136.156	91.5797
Sult1a1	0.0542581	24.4458	133.266	33.9064
Rpl19-ps12	0.483	0.0978	0.344771	10.4701
Ehhadh	0.387839	11.6968	9.94111	5.8433
Rps6ka1	0.00283871	13.9938	9.9376	2.4889
Tomm5	171.263	70.2481	42.9417	60.8437
Zfp563	3.64258	5.3218	19.8761	36.6983
Ttll3	4.57577	34.0978	21.0931	14.1044
Paqr7	11.4346	64.7004	292.407	381.788
Atpaf2	55.4036	5.56824	6.11317	23.1833
Ccdc62	15.0363	0.05208	12.676	48.0854
Reep6	0	1.34568	10.5917	0
Mphosph10	39.0918	12.182	14.3265	0.0796
Rps27l	558.061	181.857	154.59	102.876
Ruvbl1	110.92	62.2128	22.8737	27.9159
Pdpn	66.4596	115.93	189.922	173.037
Tbl3	71.6973	13.5187	10.671	14.2427
Cyb561d2	9.44697	5.40732	20.6913	41.3993
Cetn3	300.045	151.782	96.3818	47.3069
Mdk	280.699	77.3745	85.0617	62.6163
Nid2	0.106645	13.2563	10.1006	7.0123
Ccdc84	0.430484	8.74452	8.82946	38.2126
Rbm38	30.3519	2.57388	3.25829	0
Spsb1	0.00222581	21.7686	8.39997	2.60025
Ankrd50	0.283129	9.71604	0.836486	0.7347
Fxyd7	0	28.7693	12.788	2.3536
Rsph9	26.0674	168.877	136.582	29.8029
Rad51c	9.78113	0.00224	0.01	0.97055
Saraf	86.7868	415.808	663.938	523.607
Dap	7.43439	17.3846	10.3218	0
Gars	151.295	32.1876	21.6057	1.398
Fut9	4.13348	4.28572	20.4267	20.7525
Pank1	1.84155	23.6929	14.5578	11.4726
Gtf2h1	37.4377	4.32784	19.7466	0.55225
Ptn	173.74	359.369	599.345	459.193
Adgrl3	3.86552	2.29676	21.0074	30.1812
Kifc3	4.53565	12.6462	17.5765	57.4391
Helt	31.2173	0	0	0
Dtna	96.2411	222.494	166.112	103.409
Mid1ip1	161.242	295.164	412.364	287.784
Ypel3	205.666	227.759	91.2565	26.5149
Kifc1	14.3333	0	0	0.0199
Eif3g	209.912	90.0733	61.1589	67.4146
3830406C13Rik	26.0896	33.4713	45.5415	2.62755
Rfwd3	26.101	3.11504	7.28683	3.14915
Tsen2	43.7067	12.9317	6.66137	25.1819
Slc13a3	8.10203	56.177	76.5118	37.3681
Mapk1ip1l	44.841	7.2512	9.34526	10.7644
Rps10	756.156	321.438	244.038	96.2091
Rpl15	943.031	254.361	129.422	111.054
Galnt18	2.421	10.2068	27.9005	3.7893
Map7d2	0.312806	12.6746	2.2818	0.02505
Nono	345.16	97.1104	69.0302	27.2969
Tmem53	3.14065	15.2294	27.7567	8.2523
Nsmce4a	208.246	81.6607	17.1093	17.7313
Castor1	0	31.6054	20.1915	7.62545
Rexo5	33.7518	9.45036	5.2084	3.84205
Kpna2	668.267	18.3888	26.884	24.3205
Lrrfip1	32.0591	3.53268	0.202114	12.0834
Tipin	246.763	37.538	39.9063	6.626
Adgre5	0	20.5642	20.4236	8.0045
Ppil3	76.4504	19.778	49.9259	1.5324
Prodh	4.891	155.692	143.785	221.957
Arhgap11a	25.175	0	0	0.536
Phactr1	9.72939	55.9741	52.6199	34.5635
Sumf2	21.4589	41.2073	59.0515	56.5341
Alg2	30.417	75.3137	83.458	77.7852
Psmg1	81.5359	18.3193	26.189	18.613
1700030K09Rik	27.0615	2.52068	1.50131	21.2957
Stambpl1	0	9.62008	6.46969	15.881
G2e3	40.902	0.82256	1.25277	7.1931
Arhgap35	4.64742	4.49208	2.34846	11.9857
Sap30l	2.03035	9.26352	19.0821	15.1389
Hddc3	8.95635	8.59468	13.0401	36.5393
Atraid	94.9228	276.133	439.736	190.537
Lgr6	0.607613	0.29316	1.48649	25.4564
Slc20a1	32.1448	63.6977	168.61	229.293
Cnn3	337.598	906.178	399.626	308.077
Abat	31.8289	93.3964	129.13	60.1917
Zfp488	3.51774	3.47828	9.51511	17.8129
Slmap	13.6778	50.9606	59.0465	28.4994
Mak16	74.7644	9.51512	0.0136	2.292
Rita1	14.7878	13.7099	17.5629	44.8321
Ndc80	94.9028	0.00728	0.0235714	0.0124
Gpsm2	68.6434	19.3854	9.1036	12.5899
Kctd20	60.4603	15.3261	8.37183	20.0568
Sgo1	34.2989	0.0014	0.151771	0.00435
Rpusd4	23.372	17.1778	0.396514	0.1188
Rps9	1436.4	389.624	227.435	144.679
Ccdc163	53.2503	2.75276	5.12731	33.3887
S100b	1.01526	4.09208	106.119	150.635
Myl12a	150.419	82.4974	44.7816	35.1988
Acp1	90.4334	24.7329	9.78311	16.5324
Hnrnph1	389.188	108.889	113.387	92.1192
Map2k3	29.6412	3.3536	3.95446	0.00435
Ddx21	28.3335	11.7257	0.825	3.7551
Nap1l1	337.409	69.38	40.4821	23.6541
Rps28	995.669	338.739	133.952	83.8354
Lhfpl2	0.19471	19.8268	17.2002	1.5889
Hnrnpc	295.849	116.724	65.0765	41.6155
Grb10	13.9082	10.441	0	0.00155
Rexo2	140.821	26.6795	75.5645	68.0806
Aptx	46.9541	12.9948	6.93394	12.7204
Mrpl2	116.518	34.3176	22.1914	67.1835
Ybx1	824.991	163.2	88.9679	60.4104
Neu1	3.49255	23.3599	26.0398	18.2501
Stx7	18.0751	53.2608	59.3617	49.5866
Rps23	486.475	179.024	78.6839	71.6098
Nrxn1	44.7629	58.7377	153.091	103.443
Rnd3	66.7424	94.2242	20.9378	11.2695
Glod4	143.152	79.5304	32.1079	24.0506
Topbp1	31.8303	10.2736	5.16003	5.85425
Bex3	379.125	118.434	54.8126	27.9728
Pole2	28.576	0	0.00357143	0.01195
B4gat1	24.4647	39.2938	150.808	90.3954
Lage3	116.813	8.12908	34.8344	14.6614
Dsn1	74.8789	14.2391	9.54246	15.6667
Nap1l5	20.0061	127.35	72.5928	35.0625
Chd7	79.0991	20.1271	16.0764	9.81365
Itgb3bp	54.1476	6.45368	8.0458	7.7793
Chac1	8.28242	0	0	0
Coro1c	201.045	12.3008	4.34651	7.82305
Gtf2h3	36.614	7.07852	4.4398	8.3326
Spry4	0.820226	0	1.22849	15.3502
Firre	6.61658	21.4748	17.6216	44.1703
Fam219b	22.1452	3.08552	1.83726	3.82115
Elp3	81.6094	25.4641	20.5349	9.19945
Araf	65.5011	71.8059	107.741	171.319
Cyb5r3	44.0919	57.5246	17.2057	3.83965
Dapp1	21.6871	96.1999	55.7298	16.6793
Ube2i	439.746	128.995	105.762	87.5278
Gm6863	103.675	46.2743	33.6783	12.1232
Serinc1	80.8555	124.464	369.462	284.001
Rbmx2	33.6995	7.15288	1.49557	3.83595
Ntrk3	0	2.6694	10.0827	16.1831
Gsap	7.54113	4.77824	12.9033	52.3605
Fnbp4	28.8391	22.8528	9.61103	52.5534
Zcchc18	37.9679	255.839	145.27	24.8783
AA413626	0	2.48224	4.63123	12.079
Bicdl1	1.71235	18.5699	10.6413	14.7789
Gbp2	5.94248	29.1486	0.00391429	0
Eif2s3y	68.8383	54.3582	94.1965	262.774
Tmem160	40.2912	37.9664	38.3287	7.40365
Cdca5	75.6224	0.00816	0	0.0474
Erich1	13.4564	0.1186	1.88689	0.0603
Nap1l4	158.779	68.9908	33.9453	31.129
Hyi	5.7649	37.7261	17.9785	6.0967
Slc25a20	17.9484	49.63	79.4805	23.3644
Cmtm5	99.1977	442.653	767.327	539.801
Ttc38	3.82184	11.3338	6.097	22.6782
1810009A15Rik	120.128	49.3748	35.6599	49.8283
Slc29a4	7.79142	0	0	0
Nutf2-ps1	330.07	74.2722	75.5332	59.6458
Med27	72.4423	30.7422	37.0228	7.4802
Siah1b	31.5586	0	5.51314	14.6077
Anln	22.4348	0.00324	0.00308571	0.00465
H3f3a	1599.6	635.078	422.162	224.646
Mfsd13a	3.91658	9.64396	31.4591	20.9212
Timm10	87.464	20.9802	23.015	55.4584
Pold1	54.2499	0.00208	0.0142	0.01315
Il11ra1	8.32758	80.2663	89.0088	47.2861
Dgcr8	24.7347	3.40824	6.51857	1.3091
Kat8	61.2387	15.2205	12.1457	16.8159
Gdf10	0	0.00324	55.4435	20.1882
Olfm2	10.9313	0	0	9.7756
Exosc2	55.1719	20.164	13.3514	22.1609
Pfn4	13.6296	44.3284	29.5269	6.06415
Ola1	66.3022	22.2358	12.8537	26.7758
Eif4a3	331.195	85.992	83.7484	83.9501
Alyref	96.5392	33.3558	12.1742	5.55205
Hpx	0	0	4.86774	10.5653
Chchd7	59.2237	215.197	134.417	71.5597
Limd2	70.4937	21.1254	9.08966	4.2054
Timp3	26.2604	125.992	258.822	165.334
Mical2	1.16616	3.662	26.5675	34.7091
Pes1	45.2837	22.0099	2.25663	9.4519
Aldoa	187.661	791.362	830.645	908.596
1810013L24Rik	4.06374	6.65528	25.033	17.8088
Fam13c	24.8562	12.647	67.1919	71.809
Traf4	89.8272	3.19084	11.0415	12.3283
Mks1	12.5245	4.61384	6.40663	35.3589
Pdss1	36.244	0.00596	10.6897	2.953
Glyr1	85.0962	26.8056	20.3877	31.8108
Nusap1	82.2723	0.35624	0.00871429	1.53345
Cdh11	6.93123	19.364	37.2914	45.045
Ppip5k1	11.8868	1.5648	5.75669	23.1624
Rps16	1058.87	408.433	188.041	75.9955
Brca1	17.4638	2.9034	0	0.0217
Rfc2	175.043	64.4039	21.4172	25.8875
Acot11	3.142	32.7029	34.2202	44.4624
Cep83	29.0213	6.03948	1.6774	7.0691
Hacd3	81.6336	243.548	435.634	360.075
Fam32a	112.3	82.3485	22.3323	23.0961
4933439C10Rik	11.1136	13.5353	43.2992	45.4774
Ctsf	23.0528	112.473	254.982	198.261
H4c4	237.715	35.3375	20.3766	13.9432
Rars2	58.0597	16.4421	9.99489	18.2145
Anks1	55.3519	12.6794	10.9877	34.2814
Ephx2	0.43671	64.8293	258.538	149.069
Eif4b	105.483	20.0833	25.8793	14.9037
Cttn	73.478	21.2306	17.6226	23.2996
Igfbp5	80.2068	151.815	24.1296	6.6208
Shisa4	150.857	240.338	352.192	298.364
Nop9	27.0822	9.23456	1.2394	10.7397
Thoc3	47.9966	34.8186	12.9615	3.7974
Scly	1.14984	0	3.03263	30.3166
Eif5a	1182.06	262.178	214.836	82.6419
Atp6v1g2	13.3947	0	4.25051	0.02645
Pdcd6ip	42.8362	4.07724	11.9337	21.0602
Lzts1	71.4748	1.7044	0.760229	0.50775
Phf5a	155.198	82.2331	50.8642	35.1333
Phlpp1	2.43497	24.5856	23.9571	11.2277
Slc25a34	0	3.10208	4.92589	11.463
Slc12a9	1.43994	22.13	27.4546	29.019
Uckl1	36.1343	31.2802	55.5296	100.618
Nrn1	0	0	0	25.8435
Thumpd3	74.119	35.0552	16.1578	51.7966
Rpa2	205.352	38.7148	28.8163	35.1782
Ak1	5.40274	30.4583	77.89	27.9574
Ctsd	158.865	297.783	687.668	466.356
Otulin	14.3121	5.4694	0.105657	0.0126
Dna2	14.6062	3.44112	0	2.4794
Rps13	770.65	333.562	167.949	114.734
Vars	80.505	9.07612	4.46794	4.89005
Cryzl2	12.3646	54.7739	20.4467	3.2546
Thbs4	18.3033	482.905	85.6901	0
F2r	34.7818	19.7474	6.87191	0.0026
Snhg15	51.5409	11.5207	15.1969	7.88135
Togaram2	0.00290323	18.139	5.34463	1.43405
Cdc7	30.3439	0.04464	0.00345714	2.51745
Arl6	74.1335	14.5346	26.2317	20.0399
Hhatl	0	3.24772	50.6788	37.4812
Jpt1	634.9	45.8905	10.5292	13.2596
Mgme1	34.0877	6.85988	5.79083	5.1154
Cmtm7	7.32313	0	0	0.1128
Itpr2	0.832581	16.4171	32.6727	72.6793
Ncaph	87.3922	0	0.00305714	0.02195
Nop10	192.246	51.8914	44.4498	20.9358
Zrsr2	33.0642	5.51752	2.18831	8.70665
Slc25a33	13.5634	14.825	74.9147	60.1093
Lrrc59	35.4092	4.17868	6.54631	7.3382
Gm10163	4.95548	9.70212	3.51894	16.8962
Aldh1l1	53.0171	161.793	210.197	199.297
Ubc	2094.3	1882.25	1882.32	3615.81
Skp2	51.0714	0	4.55014	1.8042
Nop53	99.9868	33.9191	28.1689	16.1515
9430015G10Rik	32.4333	18.8466	6.62369	1.1417
Dnajc12	14.4533	44.3552	6.30729	0
Prkcb	18.4981	12.9019	2.94197	0.76985
Tma16	25.0255	2.71896	12.7566	3.64295
Pih1d2	0.781161	28.2009	2.77489	2.6351
Gm20743	0	15.7331	4.92769	13.0385
Pclaf	224.674	1.45156	0.0628857	0.27575
Cenpn	60.4455	0	0.00248571	0.0107
Rpl39	493.578	134.273	73.466	27.5641
Ppih	128.719	32.5454	9.91663	26.5694
Gpr107	17.1076	13.8984	83.2722	26.566
Gtf3a	106.2	20.4291	30.7737	32.4382
Tasp1	12.3911	0.37876	3.01777	0.01905
Gabbr2	0.000774194	0.0016	13.0249	19.6538
Tyw5	14.8456	14.7122	31.1912	91.6208
Wdr83os	152.321	81.082	45.5865	64.2609
Mthfd2	55.3597	0	0.0299429	3.89425
Tnc	0.0613548	26.3838	3.749	4.9361
Igsf11	6.17094	21.4519	17.7501	30.61
Dlgap1	17.7907	65.2558	63.5486	145.507
Phb	197.597	115.999	95.5437	43.1612
Hook2	11.1722	0.5024	0.0424	5.35405
Mdga2	2.54077	4.95368	17.6366	34.9072
Rnaseh1	39.9507	4.47864	4.99583	12.3287
Gstk1	43.7999	127.677	215.534	110.823
Lrrc8a	23.5049	39.092	105.526	84.8944
Gtf2e2	104.059	4.60028	18.6927	27.9447
Mettl17	20.5861	24.4141	12.4279	66.333
Tm7sf2	6.38168	45.5457	88.0974	51.802
Trim59	126.547	0.32132	5.78846	0.0198
Ska3	54.7688	0	0.0026	0.4888
Hsd17b11	0.941774	14.5575	29.5922	30.5279
1110004F10Rik	282.172	201.918	131.634	49.1987
Uchl3	135.458	20.7628	40.8984	6.28805
Serping1	4.58397	35.219	0.632	0
Clcn3	26.2839	62.1354	77.0182	40.3738
Rnd2	2.82887	14.5575	31.4743	35.1482
Rps15a	679.759	190.301	71.2969	49.9089
Car2	1.76242	21.1418	191.865	459.587
Egr2	7.36887	0	0	0
Srp19	162.419	32.6073	84.1925	85.9536
Bex4	112.975	52.309	5.12449	12.1781
Pltp	3.6131	75.1795	58.1557	0.0056
Kcnj16	0	1.5824	2.40454	79.5748
Gins1	87.8022	0.9202	7.32823	0.0144
Rbbp4	268.178	95.3751	57.5558	79.5496
Prdx6	689.318	5066.4	3821.89	2356.79
Dnajc11	55.165	18.2301	15.8255	12.43
Pigt	37.8028	22.791	34.0595	75.8867
Incenp	57.7252	2.43864	1.29857	0.01065
Alg13	20.2921	8.03516	2.18757	0.1126
Ccdc14	6.68752	0	0.147057	0.0041
Dnaaf2	25.5697	1.34112	0.740829	0.3841
Dcxr	26.3717	66.9408	86.995	55.2225
Dazap1	16.2276	4.24396	1.16366	1.11085
Nrf1	40.8988	20.9555	8.79231	51.9968
Bzw2	125.978	28.6821	9.09631	19.4489
Ier2	224.675	10.0842	0	0.0076
Bcat1	41.1767	12.1199	0.00197143	0.0199
2900076A07Rik	6.02219	18.3791	21.9455	58.9085
Rpf1	88.5983	38.8759	16.6825	23.9863
Dbi	2756.75	6605.33	1980.38	1615.62
Lmnb2	32.9435	10.1634	1.94023	0.89555
Ccne2	22.8221	0.68448	3.27063	2.10555
Echdc2	15.5016	100.312	47.3148	140.736
Agmo	0.108032	6.15656	82.5666	67.7605
Otub2	6.43061	0.00256	0.0016	7.2049
Lrtm2	0	6.49852	43.6862	60.929
Seh1l	48.5943	15.4519	0.00205714	11.0239
Fgfr2	25.6151	95.6637	91.6309	62.1972
Tshr	0.409419	31.2353	0	0
Cbwd1	18.0264	3.32316	1.94417	1.11995
Nsmce2	121.21	9.25448	29.2507	0.3619
Ampd2	15.2314	19.8306	50.43	104.521
Btf3	619.479	296.979	221.857	188.327
St8sia5	0	10.6611	24.6209	6.11775
Nup43	77.3205	0	0.224286	14.3984
Eif1ad	44.3839	8.19072	8.15414	2.37005
Psmg2	146.497	24.1751	73.6522	35.0706
Ecrg4	2.75003	33.8594	0	0
Srbd1	13.6371	2.61688	1.11951	0.0783
Dipk1a	3.15923	4.66276	14.5984	0
Gm13872	1.72032	4.16068	38.2333	86.9934
Itgb1	73.5238	34.574	30.0475	16.3217
Zdhhc6	47.7826	0.00864	22.4944	7.1211
Odf3	0	17.6263	4.30411	0
Nat8f5	0	8.07528	58.9203	85.7898
Cox7a2l	273.391	147.69	107.645	53.8442
Brix1	50.8872	15.0429	18.6881	9.8658
Gde1	82.7892	132.274	258.686	126.591
1700037H04Rik	47.8615	25.3362	2.30566	0
Crot	38.7281	40.3731	116.565	144.606
Dlx1	65.5665	1.91628	0	0.18725
Nuf2	161.214	20.6697	2.68134	0.1315
Txnrd1	75.1592	32.4071	12.814	4.3248
Plekhj1	73.1867	19.7649	25.8193	14.4529
Tbc1d31	39.057	1.95008	2.24971	7.9986
Gins2	70.617	7.01396	10.0089	0.9604
Alg1	17.6837	8.30804	41.5266	93.7601
Prag1	8.93119	0.0474	0	0
Cdc20	265.028	0.03756	0.995171	0.535
Ngef	23.4563	70.4112	145.156	107.783
Rpl10a	894.703	365.827	153.006	95.1012
Dera	19.1629	5.83284	12.0201	33.1319
Slc2a8	4.95232	30.127	61.2606	39.1028
Lgr4	0.818935	6.29176	18.5659	24.1482
Rpl27a	241.704	106.414	29.0697	19.953
Tfap4	9.00416	1.29608	0	0.19265
Pcyt2	84.9686	148.944	218.27	318.023
Fbl	104.975	29.3092	9.82754	15.986
Fam83d	35.2539	0.00244	0.0024	0.0047
Mphosph6	48.8355	8.53192	18.4689	8.07225
Rbbp7	410.232	200.875	92.9631	40.6418
Btd	5.83148	50.053	83.4025	43.1313
2010315B03Rik	6.0429	7.4776	19.5104	24.3405
Nkain4	46.0746	408.411	907.277	601.123
H4c8	1.99552	19.7227	19.1147	5.7747
2700038G22Rik	22.3053	0.0106	2.71511	0.0582
Pcdh8	1.34971	13.9405	1.18591	0
Gas2l3	17.1722	0.0916	0.0673714	0.18505
Scg5	148.138	228.707	108.644	31.8453
Nme5	26.0837	89.7494	16.9036	5.7992
Tril	14.4353	23.4873	149.194	178.609
Smn1	37.1714	23.042	7.40311	2.3862
Rpusd3	13.1135	8.42348	14.5842	52.8362
Gsto1	61.9705	21.9544	18.5727	18.1953
Smc2	196.27	5.58208	16.1948	4.4179
4933431E20Rik	49.0668	122.434	135.138	134.453
Gm5641	113.06	23.8365	40.027	10.0695
Skp1	777.377	529.661	411.115	215.911
Cav1	1.80881	39.9512	2.11597	6.04145
4933427D14Rik	17.473	17.0837	15.0293	50.2182
Atp6ap2	50.816	69.0327	111.51	167.594
Selenos	106.553	212.192	307.483	202.695
Slc27a3	18.2943	0	0.123971	0.0049
Mta2	96.6019	31.995	21.0257	4.4894
Aifm3	1.84961	61.7661	83.755	86.1893
Dbx2	37.9421	32.141	93.2026	97.6363
Fip1l1	64.3782	35.9326	24.394	2.1196
Nfix	204.744	63.7204	22.2165	16.3391
Cntfr	28.4226	86.8452	112.669	32.1409
Crnde	33.5042	0	0	0
Etaa1	14.6753	9.02116	0	2.08175
Sms	41.6154	0.04884	14.8868	9.7623
Rpl12	52.2371	19.4113	9.81666	5.8143
Pla2g7	91.4327	803.985	1611.6	1297.68
Zfp367	36.5871	11.8038	7.86134	3.7445
Prkn	9.13732	11.5956	19.8053	35.2688
Sgms1	3.43897	10.82	11.0021	41.5523
D430041D05Rik	6.83029	0	0	0
Prps1	199.373	58.5407	43.2244	9.1375
Cd200	6.94294	37.9558	0.00674286	0.01025
Polr2j	161.952	46.7943	50.1134	81.2052
Cntrl	24.9732	0.00212	3.40791	26.5872
Polr2h	109.755	9.75636	38.729	43.8552
Fads2	83.4588	405.15	311.99	330.151
Tcf12	67.6923	8.49536	20.7155	22.6146
Wdr12	49.6518	23.8551	24.8819	0.73785
Dbn1	78.8828	17.1122	20.5873	7.45575
Eif1ax	80.727	50.1676	27.2979	11.5389
Clcc1	38.7465	69.4641	105.054	60.6689
Me1	5.95071	31.6319	43.6725	35.5514
Ddah1	119.645	327.737	333.453	152.103
Plk4	41.9388	0.14228	0.253771	3.4505
Unc13d	7.55761	4.18268	7.78209	26.8567
Pttg1ip	79.4245	233.664	260.488	116.078
Pkig	103.214	77.6391	24.7035	7.4999
Rad51	50.0548	10.3241	0.104971	2.9926
Enkur	2.45348	70.1553	0.103229	0
Axl	36.1454	66.2467	77.7809	102.745
Cfdp1	228.409	88.1171	44.5428	47.6059
Gm10288	109.001	61.8525	27.563	10.898
Dnajc2	65.0702	15.6636	2.97911	15.9507
Ropn1l	20.4958	4.11568	2.05786	1.41155
Acadsb	25.0608	86.9246	63.3325	34.147
Prnp	162.954	1081.68	2018.31	1134.44
Rcc2	38.0095	5.49388	0.0048	0.5553
Gm5577	0.105774	15.4919	3.6468	0.64525
Pik3ip1	37.8445	86.6116	197.203	165.938
Gin1	12.6097	27.2727	12.2584	2.79185
Nphs1	0.021871	0.0522	0.756943	12.3775
Gtpbp4	50.8757	13.2572	12.1341	1.83545
Itga7	1.49184	0.88292	10.7038	30.5867
H2bc6	0.802774	20.8015	23.0345	18.6986
Gpr37	0.166677	13.6842	40.6967	34.6288
Nol12	48.7093	50.9964	24.1504	4.06065
Eprs	99.4203	34.2481	26.3978	18.7419
Depdc1a	33.0089	0.00212	0.00237143	0.0044
Tubb4b	814.731	386.665	212.859	166.301
BC005624	68.8736	51.4078	14.5096	14.3879
Mcm2	118.471	7.24784	2.4798	0.01955
Asah1	38.1978	109.802	153.686	212.48
Oxld1	3.06374	11.0635	28.5817	18.1882
Gm10175	251.079	136.865	71.515	44.276
Oip5	33.2165	0.05364	3.05886	0.03815
Ddrgk1	38.1904	103.269	67.4194	34.8321
Gpi1	127.551	200.731	264.281	299.232
Rasgrp2	1.4969	0.03028	5.56029	24.8021
Slc6a1	83.9921	137.64	586.074	539.907
Asf1b	49.9592	4.63328	3.71486	0
Nme4	59.9095	6.27396	1.76437	0.0258
Usp54	5.44581	9.02896	36.2475	37.3613
Eva1a	0	38.9758	189.27	252.387
Bhlhe41	2.88155	22.361	38.1918	47.9483
Kif20b	18.479	0.00104	0.00254286	0.00305
Slc22a4	0.423387	18.7419	18.0049	27.2903
Taf9.1	299.66	94.3611	65.1259	43.931
Nsmce1	183.474	57.1945	85.9757	25.7846
Rhbdl1	0.716903	26.7991	10.1101	4.9661
Fam136a	75.4805	4.91084	9.51806	0.00585
Tcf19	114.258	0.005	2.40937	0.02505
Tbrg4	22.1677	4.15948	1.77331	11.2561
Srsf11	152.745	60.092	55.6874	82.7225
Mfge8	1339.27	1166.93	2895.68	3040.39
Junb	59.8549	31.3322	0.688143	0.0184
Gnl3	68.2484	34.521	10.691	8.2185
Pdzrn4	15.5852	0	1.01537	0.06
Clic1	150.949	112.739	56.4463	12.4319
Msi1	28.5466	11.2023	11.9801	27.3481
Cby1	127.417	81.7516	49.8829	17.0607
Smyd2	64.1983	0.01764	14.4594	12.9616
Usp1	68.0782	0.4096	12.5385	0.0371
Cars2	18.3344	0.00816	3.9504	0.13175
Ranbp3	66.8959	9.4332	13.6976	2.3129
Cdh10	7.46416	19.4992	67.642	59.7201
Rpl23	688.124	226.877	118.617	94.4998
Ppp1r36	0	21.8318	4.11354	0
Fbxw7	11.6882	0.3966	0.0219429	8.0499
Jkamp	75.3874	39.3747	91.0544	195.15
Prdx4	352.967	197.424	226.778	13.7086
Slc35e4	2.49513	3.79984	30.5938	38.5913
Celrr	1.80694	5.107	10.9917	27.245
Ogdhl	2.8219	10.9045	26.6284	36.6076
Abr	14.756	50.5731	72.8583	72.5425
Cavin3	50.3951	229.815	106.327	108.103
Bcorl1	0.376677	0.99036	0.2528	11.7622
Slc25a5	602.742	178.895	296.995	397.014
Isy1	59.1605	32.1539	2.4202	2.795
Ipo7	30.9497	0.17104	9.2042	0.0112
Grn	20.1003	83.9478	116.201	96.9423
Nedd1	34.1837	5.73356	14.1209	2.18385
Dnaja1	299.109	94.593	90.9524	71.7403
LTO1	32.6652	1.37728	6.38431	6.589
Ubl3	19.7864	56.3578	72.5964	50.0406
Tmem107	98.7784	130.699	34.3536	8.09585
Rtraf	209.936	48.1137	64.4544	47.5352
Swi5	514.265	269.619	200.824	103.649
Itgb5	8.48729	33.3324	31.3463	20.5898
Adora2b	0	7.97396	61.494	139.452
Napepld	6.9381	0.21824	0.00225714	0
Tom1	1.59171	3.55832	6.876	22.0092
2810408A11Rik	16.2245	4.44168	0.0157714	0
Trp53i11	9.66274	0	0.00191429	0.02735
Mns1	45.7882	8.61948	0.500657	0.05515
Ccnt2	41.3592	39.65	60.7906	124.056
Rps6-ps4	171.147	85.0623	16.2549	14.0214
Tedc2	10.5374	0.00968	0.702657	8.08875
Psme3	60.4863	9.44812	12.1538	18.9918
Acap3	6.67529	0	0.158171	8.55165
Mcl1	35.8275	15.6531	8.83657	1.75245
Stx6	81.5198	11.7157	13.6953	15.2298
Exosc10	65.6452	21.9042	19.3621	41.5648
Fmo1	20.9044	92.6072	80.996	40.1156
Shmt2	118.764	25.2208	20.0022	19.16
[truncated: 1,252 more rows]
