# Supplementary material for: Characteristics of quiescent adult neural stem cells induced by the bFGF/BMP4 combination or BMP4 alone in vitro
Source: Front Cell Neurosci. 2024 May 22;18:1391556. doi: 10.3389/fncel.2024.1391556 (PMC11151745; doi:10.3389/fncel.2024.1391556)
Supplement: Supplementary file 3 [file Table_3.xlsx]

## Sheet: cell cycle chrom
Supplementary Table S3. List of genes associated with cell cycle and chromatin segregation.
Gene Symbol
Knstrn
Cdc20
Top2a
Klhdc8b
Prc1
Cdca8
Spc25
Nek2
Ect2
Ncapg
Spc24
Knl1
Kif2c
Espl1
Esco2
Incenp
Kif23
Cit
Racgap1
Sgo2a
Fbxw7
Ncapd2
Ncaph
Kif22
Ccne1
Nsl1
Cenpn
Ska3
Pmf1
Sgo1
Brip1
Nuf2
Chtf18
Tacc3
Tex11
Rmi2
Kif18b
Ska1
Cenpq
Ncapg2
Cenph
Ddx11
Cenps
Ccne2
Cenpw
Fen1
Mcmdc2
Recql4
Oip5
Septin1
Sphk1
Timp2
Hspa2
Igf1
Ccnb1
Ccnd2
Mki67
Cdk1
Plk1
Fam107a
Cenpe
Nabp1
Plcb1
Lmnb1
Ttl
Met
Ube2c
Cdkn2b
Brinp3
Dlgap5
Cdc25b
Cdca2
Insr
Afap1l2
Nek6
Bub1
Cdc25c
Aurkb
Nusap1
Bub1b
Cenpf
E2f7
Dgkz
Brinp2
Ier3
Ndc80
Bmp7
Gas1
Birc5
Kntc1
Nek11
Ccnd1
Pkd1
Ptch1
Clspn
Zfp36l1
Rbl1
Kif14
Dtl
Slc9a3r1
Cdca5
Kif20b
Btg2
Ascl1
Stil
Fzd3
Cks2
Stox1
Fancd2
Ticrr
Brca1
E2f1
Ttk
Cdc7
Kcna5
Zwilch
Spdl1
Hmga2
Mad2l1
Haspin
Cyp1a1
Chek1
Prkcq
Cdt1
Cdc6
Gen1
Pdgfrb
Dbf4
Atad5
Smpd3
Pdgfb
Fbxo5
Stat5a
Brinp1
Eme1
Dact1
Anxa1
Ccl2
Cd28
Nanog
Klf4
