# Supplementary material for: Characteristics of quiescent adult neural stem cells induced by the bFGF/BMP4 combination or BMP4 alone in vitro
Source: Front Cell Neurosci. 2024 May 22;18:1391556. doi: 10.3389/fncel.2024.1391556 (PMC11151745; doi:10.3389/fncel.2024.1391556)
Supplement: Supplementary file 4 [file Table_4.xlsx]

## Sheet: motile cilia
gene_name	Group	Function
Rsph1	Motile cilia	Radial spoke
Ccdc40	Motile cilia	Dynein assembly
Rsph3b	Motile cilia	Radial spoke
Rsph4a	Motile cilia	Radial spoke
Cfap300	Motile cilia	Axoneme assembly and motility
Rsph9	Motile cilia	Radial spoke
Dnah2	Motile cilia	Dynein arms
Dnali1	Motile cilia	Dynein arms
Dnal1	Motile cilia	Dynein arms
Dnah1	Motile cilia	Dynein arms
E2f5	Motile cilia	MCC differentiation
Ank3	Motile cilia	MCC differentiation
Cdkn1a	Motile cilia	MCC differentiation
Foxj1	Motile cilia	MCC differentiation
Gmnc	Motile cilia	MCC differentiation
Jhy	Motile cilia	MCC differentiation
Mcidas	Motile cilia	MCC differentiation
Myb	Motile cilia	MCC differentiation
Noto	Motile cilia	MCC differentiation
Six3	Motile cilia	MCC differentiation
Tfdp1	Motile cilia	MCC differentiation
Traf3ip1	Motile cilia	MCC differentiation
Trp63	Motile cilia	MCC differentiation
Trp73	Motile cilia	MCC differentiation
Dnah10	Motile cilia	Dynein arms
Dnah11	Motile cilia	Dynein arms
Dnah12	Motile cilia	Dynein arms
Dnah14	Motile cilia	Dynein arms
Dnah17	Motile cilia	Dynein arms
Dnah3	Motile cilia	Dynein arms
Dnah5	Motile cilia	Dynein arms
Dnah6	Motile cilia	Dynein arms
Dnah7a	Motile cilia	Dynein arms
Dnah7b	Motile cilia	Dynein arms
Dnah7c	Motile cilia	Dynein arms
Dnah8	Motile cilia	Dynein arms
Dnah9	Motile cilia	Dynein arms
Dnai1	Motile cilia	Dynein arms
Dnai2	Motile cilia	Dynein arms
Dnal4	Motile cilia	Dynein arms
Axdnd1	Motile cilia	Dynein assembly
Ccdc39	Motile cilia	Dynein assembly
Dnaaf1	Motile cilia	Dynein assembly
Dnaaf2	Motile cilia	Dynein assembly
Dnaaf3	Motile cilia	Dynein assembly
Dnaaf4	Motile cilia	Dynein assembly
Dnaaf5	Motile cilia	Dynein assembly
Ttc12	Motile cilia	Dynein assembly
Zmynd10	Motile cilia	Dynein assembly
Cfap221	Motile cilia	Central pair
Cfap46	Motile cilia	Central pair
Cfap54	Motile cilia	Central pair
Cfap74	Motile cilia	Central pair
Hydin	Motile cilia	Central pair
Spag16	Motile cilia	Central pair
Spag17	Motile cilia	Central pair
Spag6l	Motile cilia	Central pair
Spef1	Motile cilia	Central pair
Spef2	Motile cilia	Central pair
Kif19a	Motile cilia	Motile cilium kinesin
Kif27	Motile cilia	Motile cilium kinesin
Kif6	Motile cilia	Motile cilium kinesin
Kif9	Motile cilia	Motile cilium kinesin
Ccdc65	Motile cilia	Nexin-dynein regulatory complex
Drc1	Motile cilia	Nexin-dynein regulatory complex
Drc3	Motile cilia	Nexin-dynein regulatory complex
Drc7	Motile cilia	Nexin-dynein regulatory complex
Efcab2	Motile cilia	Nexin-dynein regulatory complex
Fbxl13	Motile cilia	Nexin-dynein regulatory complex
Gas8	Motile cilia	Nexin-dynein regulatory complex
Iqca	Motile cilia	Nexin-dynein regulatory complex
Iqcd	Motile cilia	Nexin-dynein regulatory complex
Iqcg	Motile cilia	Nexin-dynein regulatory complex
Tcte1	Motile cilia	Nexin-dynein regulatory complex
Cfap61	Motile cilia	Radial spoke
Dnajb13	Motile cilia	Radial spoke
Rsph10b	Motile cilia	Radial spoke
Rsph3a	Motile cilia	Radial spoke
Wdr66	Motile cilia	Radial spoke
Armc2	Motile cilia	Axoneme assembly and motility
Ccdc103	Motile cilia	Axoneme assembly and motility
Cfap100	Motile cilia	Axoneme assembly and motility
Cfap206	Motile cilia	Axoneme assembly and motility
Cfap69	Motile cilia	Axoneme assembly and motility
Cfap73	Motile cilia	Axoneme assembly and motility
Nme5	Motile cilia	Axoneme assembly and motility
Spag1	Motile cilia	Axoneme assembly and motility
Tekt2	Motile cilia	Axoneme assembly and motility

## Sheet: primary cilia
Supplementary Table S4. Markers of motile cilia and primary cilia.
gene_name	Group	Funnction
Bbs10	Primary cilia and pan-ciliary	IFT-B
Bbs12	Primary cilia and pan-ciliary	IFT-B
Bbip1	Primary cilia and pan-ciliary	IFT-B
Bbs1	Primary cilia and pan-ciliary	IFT-A
Bbs2	Primary cilia and pan-ciliary	IFT-A
Bbs4	Primary cilia and pan-ciliary	Tranzition zone
Bbs5	Primary cilia and pan-ciliary	Ciliogenic TF
Bbs9	Primary cilia and pan-ciliary	IFT-A
Gli1	Primary cilia and pan-ciliary	Bbsome
Gli2	Primary cilia and pan-ciliary	IFT-B
Gli3	Primary cilia and pan-ciliary	Ciliogenic TF
Gpr161	Primary cilia and pan-ciliary	Ciliogenic TF
Kif7	Primary cilia and pan-ciliary	Ciliogenic TF
Ptch1	Primary cilia and pan-ciliary	BBBsome related (Bbsome chaperonins)
Smo	Primary cilia and pan-ciliary	BBBsome related (Bbsome chaperonins)
Stk36	Primary cilia and pan-ciliary	Bbsome
Sufu	Primary cilia and pan-ciliary	Bbsome
Ift122	Primary cilia and pan-ciliary	Bbsome
Ift43	Primary cilia and pan-ciliary	Bbsome
Ttc21b	Primary cilia and pan-ciliary	Bbsome
Cluap1	Primary cilia and pan-ciliary	Bbsome
Hspb11	Primary cilia and pan-ciliary	HH signalling
Ift172	Primary cilia and pan-ciliary	HH signalling
Ift20	Primary cilia and pan-ciliary	HH signalling
Ift46	Primary cilia and pan-ciliary	HH signalling
Ift52	Primary cilia and pan-ciliary	HH signalling
Ift80	Primary cilia and pan-ciliary	HH signalling
Ift81	Primary cilia and pan-ciliary	HH signalling
Ift88	Primary cilia and pan-ciliary	HH signalling
Ttc26	Primary cilia and pan-ciliary	HH signalling
Ttc30a1	Primary cilia and pan-ciliary	IFT-A
Ttc30a2	Primary cilia and pan-ciliary	IFT-A
Ttc30b	Primary cilia and pan-ciliary	IFT-A
Ahi1	Primary cilia and pan-ciliary	IFT-B
Anks3	Primary cilia and pan-ciliary	IFT-B
Anks6	Primary cilia and pan-ciliary	IFT-B
B9d1	Primary cilia and pan-ciliary	IFT-B
B9d2	Primary cilia and pan-ciliary	IFT-B
Cc2d2a	Primary cilia and pan-ciliary	IFT-B
Cep290	Primary cilia and pan-ciliary	IFT-B
Dzip1l	Primary cilia and pan-ciliary	IFT-B
Cibar1	Primary cilia and pan-ciliary	IFT-B
Invs	Primary cilia and pan-ciliary	IFT-B
Iqcb1	Primary cilia and pan-ciliary	IFT-B
Lca5	Primary cilia and pan-ciliary	IFT-B
Mks1	Primary cilia and pan-ciliary	IFT-B
Nek8	Primary cilia and pan-ciliary	Tranzition zone
Nphp1	Primary cilia and pan-ciliary	Tranzition zone
Nphp3	Primary cilia and pan-ciliary	Tranzition zone
Nphp4	Primary cilia and pan-ciliary	Tranzition zone
Rpgr	Primary cilia and pan-ciliary	Tranzition zone
Rpgrip1l	Primary cilia and pan-ciliary	Tranzition zone
Tctn1	Primary cilia and pan-ciliary	Tranzition zone
Tctn3	Primary cilia and pan-ciliary	Tranzition zone
Tmem107	Primary cilia and pan-ciliary	Tranzition zone
Tmem17	Primary cilia and pan-ciliary	Tranzition zone
Tmem216	Primary cilia and pan-ciliary	Tranzition zone
Tmem218	Primary cilia and pan-ciliary	Tranzition zone
Tmem231	Primary cilia and pan-ciliary	Tranzition zone
Tmem237	Primary cilia and pan-ciliary	Tranzition zone
Tmem67	Primary cilia and pan-ciliary	Tranzition zone
Ift22	Primary cilia and pan-ciliary	Tranzition zone
Ift57	Primary cilia and pan-ciliary	Tranzition zone
Ift74	Primary cilia and pan-ciliary	Tranzition zone
Wdr19	Primary cilia and pan-ciliary	Tranzition zone
Ift140	Primary cilia and pan-ciliary	Tranzition zone
Atxn10	Primary cilia and pan-ciliary	Tranzition zone
Rfx3	Primary cilia and pan-ciliary	Tranzition zone
Wdr35	Primary cilia and pan-ciliary	Tranzition zone
Bbs7	Primary cilia and pan-ciliary	Tranzition zone
Ift27	Primary cilia and pan-ciliary	Tranzition zone
Rfx1	Primary cilia and pan-ciliary	Tranzition zone
Rfx2	Primary cilia and pan-ciliary	Tranzition zone
Rfx4	Primary cilia and pan-ciliary	Tranzition zone
