# Supplementary material for: Characteristics of quiescent adult neural stem cells induced by the bFGF/BMP4 combination or BMP4 alone in vitro
Source: Front Cell Neurosci. 2024 May 22;18:1391556. doi: 10.3389/fncel.2024.1391556 (PMC11151745; doi:10.3389/fncel.2024.1391556)
Supplement: Supplementary file 5 [file Table_5.xlsx]

## Sheet: Table S4
Supplementary Table S5. The RNA row counts in our study. bFGF/EGF represent bFGF/EGF-treated NSCs, bFGF/BMP4 represent bFGF/BMP4-treated NSCs, and BMP4 represent BMP4-treated NSCs.
gene_id	bFGF/EGF_1	bFGF/EGF_2	bFGF/EGF_3	bFGF/BMP4_1	bFGF/BMP4_2	bFGF/BMP4_3	BMP4_1	BMP4_2	BMP4_3	gene_name
ENSMUSG00000064351	154309	112250	165243	209202	224882	209653	217607	245427	230968	mt-Co1
ENSMUSG00000001270	149206	185067	138009	252331	232185	229798	91261	132401	103686	Ckb
ENSMUSG00000002341	15429	16416	16650	393801	358369	388372	28186	27869	52334	Ncan
ENSMUSG00000037742	135095	131454	121054	54034	56212	58457	36440	50707	41133	Eef1a1
ENSMUSG00000064370	65964	41312	77412	107988	116547	85954	104469	127835	98921	mt-Cytb
ENSMUSG00000025203	50130	51990	48692	58999	66852	64280	84355	95429	95156	Scd2
ENSMUSG00000119584	77111	64035	73628	73707	46701	62441	63472	54814	56397	Rn18s-rs5
ENSMUSG00000013698	17960	21338	17964	71998	68604	70709	105171	127947	118082	Pea15a
ENSMUSG00000064341	49366	36371	58748	59209	69262	52453	53079	72971	52028	mt-Nd1
ENSMUSG00000000184	24341	19689	27677	63768	71451	80134	12550	9191	17431	Ccnd2
ENSMUSG00000046160	50033	54455	42141	38678	39130	46719	6726	9315	13149	Olig1
ENSMUSG00000026249	34604	35901	36633	45720	57996	60929	30943	44357	39759	Serpine2
ENSMUSG00000068748	33257	25340	41150	34980	39621	40213	11854	11128	15067	Ptprz1
ENSMUSG00000034994	55119	54480	47346	32177	26921	27763	21835	22049	21662	Eef2
ENSMUSG00000025393	34243	37793	30026	44505	39256	38861	36535	47080	37563	Atp5b
ENSMUSG00000064367	25579	19232	34222	55340	63935	51659	69864	56107	65532	mt-Nd5
ENSMUSG00000020427	34680	43178	36121	43270	57977	57236	4372	9078	8759	Igfbp3
ENSMUSG00000029309	2196	1634	2033	73497	53788	57335	49258	53665	54049	Sparcl1
ENSMUSG00000039323	21550	26426	20756	45485	54254	55447	1483	4113	3824	Igfbp2
ENSMUSG00000026728	52185	57220	51961	11448	11851	13015	67119	79070	60569	Vim
ENSMUSG00000056515	20144	21870	18283	41067	48309	49080	25384	33499	28193	Rab31
ENSMUSG00000023944	42203	40938	39358	22089	22000	23369	18153	19547	17290	Hsp90ab1
ENSMUSG00000064363	16324	10695	20868	42660	46602	37964	48237	58701	45482	mt-Nd4
ENSMUSG00000033763	23861	24330	22671	35443	28160	30313	15490	13989	16778	Mtss2
ENSMUSG00000064345	22071	17778	30786	35575	43250	32500	39503	49877	37648	mt-Nd2
ENSMUSG00000031342	13839	9060	15245	38165	35692	36375	38715	37586	38458	Gpm6b
ENSMUSG00000015656	27252	27540	32119	18575	19261	23196	20978	25524	21488	Hspa8
ENSMUSG00000025428	25711	27374	22608	28403	27051	26874	26746	34076	27143	Atp5a1
ENSMUSG00000004892	4644	4462	4726	56644	47881	47728	26539	27381	28068	Bcan
ENSMUSG00000032294	25904	26861	23072	29436	28225	28487	17455	22900	19376	Pkm
ENSMUSG00000033350	5165	6297	5410	56195	51213	48920	19051	22925	24337	Chst2
ENSMUSG00000004207	12626	13233	11892	37577	34728	34440	42654	47777	43216	Psap
ENSMUSG00000057738	33195	35013	37129	22783	25939	27889	15107	11094	15479	Sptan1
ENSMUSG00000063524	23564	23134	18960	30964	32139	33167	17711	23597	18232	Eno1
ENSMUSG00000002985	492	644	483	55349	37988	32905	129988	163069	121439	Apoe
ENSMUSG00000092341	8431	9711	19339	41311	28973	23530	45023	25455	45049	Malat1
ENSMUSG00000021794	5396	5408	4949	45873	42664	40337	41300	47679	41307	Glud1
ENSMUSG00000029580	44113	48988	38484	12281	9359	11163	14793	14565	14316	Actb
ENSMUSG00000005610	28673	21941	25912	17551	19782	19993	19561	22552	20020	Eif4g2
ENSMUSG00000007097	737	1160	1041	65890	47683	45024	17525	15975	15102	Atp1a2
ENSMUSG00000072235	31804	33238	27550	8752	12428	12873	31024	46286	28747	Tuba1a
ENSMUSG00000027447	2884	3798	2722	45745	41862	38095	24383	51418	35546	Cst3
ENSMUSG00000022122	3156	2431	2821	31873	27066	28657	30954	36306	42298	Ednrb
ENSMUSG00000062078	19467	13510	20193	18352	18872	18460	16390	16329	17104	Qk
ENSMUSG00000032826	9064	7688	11194	44827	31680	32174	16411	11679	20630	Ank2
ENSMUSG00000025151	30187	36134	30721	10905	11843	12151	7961	9811	7897	Maged1
ENSMUSG00000041329	2197	3090	2879	43512	32769	33007	38858	31575	30543	Atp1b2
ENSMUSG00000062825	36120	37380	31336	10804	7983	10913	16639	16529	15169	Actg1
ENSMUSG00000005360	10422	8966	12469	16223	15801	19137	16992	14938	15154	Slc1a3
ENSMUSG00000024661	10734	12272	10011	20110	21202	20812	51139	74424	43287	Fth1
ENSMUSG00000020932	6	4	10	1140	1287	1337	208096	169296	151743	Gfap
ENSMUSG00000025153	16432	16533	14899	14582	15751	13836	9315	6602	9710	Fasn
ENSMUSG00000068923	10563	9302	10637	22975	28516	29601	10523	10319	12594	Syt11
ENSMUSG00000031785	10230	10559	8915	22621	28949	31370	9914	8533	13314	Adgrg1
ENSMUSG00000020849	19956	19360	19436	14862	15279	15910	13860	16979	14657	Ywhae
ENSMUSG00000037706	10642	11863	9795	19439	20736	21692	24858	32993	28504	Cd81
ENSMUSG00000022477	9486	10308	8480	22017	18821	19571	16311	15846	17015	Aco2
ENSMUSG00000056201	23974	25589	20919	9658	9053	9134	6707	10608	7310	Cfl1
ENSMUSG00000032281	6756	8714	7839	28970	25277	25383	13126	12596	11142	Acsbg1
ENSMUSG00000006932	15530	13276	12911	15272	18651	18366	12210	15166	14524	Ctnnb1
ENSMUSG00000037852	8811	8359	8696	23529	21019	19193	16544	21737	18574	Cpe
ENSMUSG00000055254	5676	5699	5851	25235	21826	23496	32090	20968	33806	Ntrk2
ENSMUSG00000028364	41548	39846	48578	3573	4197	3864	3244	2918	3686	Tnc
ENSMUSG00000001525	39967	34396	24045	4059	5611	5999	5197	6154	4709	Tubb5
ENSMUSG00000036565	13194	14627	11570	13416	12084	12437	5084	4345	5195	Ttyh3
ENSMUSG00000026074	14371	11927	13577	15469	17665	17126	9152	8393	10474	Map4k4
ENSMUSG00000029838	14883	11800	14705	12182	9811	10147	3006	4512	4454	Ptn
ENSMUSG00000070348	37871	42284	43907	495	561	906	255	207	209	Ccnd1
ENSMUSG00000032518	27876	30827	23047	6109	6649	6995	4637	7161	4994	Rpsa
ENSMUSG00000005089	3202	2098	3126	41091	34617	30739	14336	11147	16676	Slc1a2
ENSMUSG00000093930	10572	9813	17649	6570	9867	9247	14789	23294	17855	Hmgcs1
ENSMUSG00000070047	10322	9151	8746	16787	18912	18984	23861	11412	25755	Fat1
ENSMUSG00000004980	16727	11589	16774	11482	12516	11313	10759	12679	10810	Hnrnpa2b1
ENSMUSG00000039830	25684	26167	19872	7940	8463	12028	834	1001	2101	Olig2
ENSMUSG00000067274	24637	26676	20573	6901	6864	7613	5586	8370	5895	Rplp0
ENSMUSG00000049775	20047	19839	17317	10946	9587	10587	9357	16268	12027	Tmsb4x
ENSMUSG00000025809	15877	12125	16243	13773	14505	14933	10333	12201	11617	Itgb1
ENSMUSG00000031765	3519	4580	3683	13903	10964	8160	78936	127304	66983	Mt1
ENSMUSG00000020719	20019	15665	19140	13038	13069	13182	12926	15074	13088	Ddx5
ENSMUSG00000032216	22653	15821	20663	9148	9112	9787	12297	9706	12189	Nedd4
ENSMUSG00000032172	6803	8779	8090	18480	20582	20900	7923	8964	9436	Olfm2
ENSMUSG00000016319	18953	18287	15856	11909	11224	11019	10075	15028	11075	Slc25a5
ENSMUSG00000026701	3140	3606	2852	19067	14181	14697	71965	89522	57864	Prdx6
ENSMUSG00000063077	11834	8389	11492	20371	17831	15920	16884	11857	17430	Kif1b
ENSMUSG00000005683	11454	12288	10529	15818	13725	14549	15544	13369	13953	Cs
ENSMUSG00000028649	9175	6081	10180	18429	19461	17370	21920	12105	25530	Macf1
ENSMUSG00000026473	3474	3426	2913	44306	26271	21332	19265	29990	27808	Glul
ENSMUSG00000019874	14766	11594	15078	5967	4623	5102	10444	11439	7666	Fabp7
ENSMUSG00000024411	55	67	42	19246	22862	18797	83958	70711	82747	Aqp4
ENSMUSG00000060126	16996	17745	15564	7692	8041	8302	6733	10208	7465	Tpt1
ENSMUSG00000022285	10911	10602	10163	8076	10685	10147	15761	19165	16976	Ywhaz
ENSMUSG00000045136	23304	24614	19252	3837	6674	7176	5240	6917	6243	Tubb2b
ENSMUSG00000047126	14811	11989	15342	11220	12299	12050	10828	9110	11702	Cltc
ENSMUSG00000061904	10484	11276	9960	13417	14251	14452	13861	19324	13593	Slc25a3
ENSMUSG00000031633	9930	10278	9713	16498	13677	12439	12794	18302	13227	Slc25a4
ENSMUSG00000024012	5130	5516	4188	16978	18989	19041	8718	11486	9343	Mtch1
ENSMUSG00000025743	9754	10236	6633	13160	18478	18080	3659	4558	6518	Sdc3
ENSMUSG00000031447	6875	7727	6623	17925	17739	17699	17859	21971	19841	Lamp1
ENSMUSG00000039959	17389	17150	19548	4707	3769	4737	984	599	1097	Hip1
ENSMUSG00000039630	16847	10917	17062	8832	9169	8783	7815	7601	8792	Hnrnpu
ENSMUSG00000028639	22799	21632	18371	5647	4875	4997	4544	5193	4291	Ybx1
ENSMUSG00000030029	6532	7180	6719	16749	18521	18433	5836	7400	7300	Lrig1
ENSMUSG00000015222	16696	11397	18922	7416	8155	7508	10001	7451	10016	Map2
ENSMUSG00000032399	21526	20202	18892	5994	5948	6294	4330	5910	4551	Rpl4
ENSMUSG00000020612	11490	11551	11452	11226	11915	12470	10648	12045	10650	Prkar1a
ENSMUSG00000069662	13087	11541	11081	8013	7924	8535	5095	4912	5889	Marcks
ENSMUSG00000018707	12093	11101	11333	13672	13981	14305	12204	7790	13291	Dync1h1
ENSMUSG00000086503	13153	7959	15729	10603	8561	8682	12694	4924	11020	Xist
ENSMUSG00000035805	2900	3088	2427	16964	16118	16890	22417	25452	25402	Mlc1
ENSMUSG00000032855	13048	15216	17105	10213	9470	9107	4682	2813	4887	Pkd1
ENSMUSG00000023010	7329	8237	6928	16950	15917	16011	14071	16834	15362	Tmbim6
ENSMUSG00000032562	8973	9754	8258	10286	9947	10518	20625	21473	18623	Gnai2
ENSMUSG00000032324	7009	7181	6358	16423	16556	16793	18305	24499	21493	Tspan3
ENSMUSG00000071866	16816	21438	17511	4527	7972	8251	4709	6289	7523	Ppia
ENSMUSG00000021546	18186	15883	16253	6695	7688	7671	7139	8511	7408	Hnrnpk
ENSMUSG00000030310	9174	9755	10064	10249	10015	9508	6891	6435	7197	Slc6a1
ENSMUSG00000024393	13026	13178	12611	10486	8501	9448	7699	5148	8052	Prrc2a
ENSMUSG00000046240	5741	7168	5764	18401	16075	14110	15874	15940	16085	Hepacam
ENSMUSG00000009575	13263	8334	10073	8369	11139	10820	10840	8759	12477	Cbx5
ENSMUSG00000037747	2716	2389	2416	15682	20103	20062	12069	14752	14071	Phyhipl
ENSMUSG00000037071	6250	7385	7402	9791	11281	10444	15139	18242	17389	Scd1
ENSMUSG00000020368	10171	8993	11893	12429	13262	12902	12059	12428	13405	Canx
ENSMUSG00000039952	7471	7618	6887	15508	16112	16566	12138	9528	13357	Dag1
ENSMUSG00000020315	7234	6236	7575	14015	13304	13653	21554	14674	24576	Sptbn1
ENSMUSG00000060036	18496	19311	16496	5828	5851	6227	4661	6252	4911	Rpl3
ENSMUSG00000030695	10687	12376	10676	11892	10444	10657	12966	17263	13405	Aldoa
ENSMUSG00000044533	20804	21637	16730	5240	4706	4981	4133	6121	4411	Rps2
ENSMUSG00000040249	5353	5516	6244	20507	16198	17681	12526	6496	13003	Lrp1
ENSMUSG00000041544	198	255	258	24137	21149	24540	17316	8747	18815	Disp3
ENSMUSG00000026385	5194	6165	5552	11531	10511	9801	24955	37043	24581	Dbi
ENSMUSG00000029467	10255	10099	10561	9671	10891	10216	18452	15795	16083	Atp2a2
ENSMUSG00000000740	17478	18764	14972	5937	5794	5860	3329	5200	3737	Rpl13
ENSMUSG00000062070	9820	10091	8826	10796	12356	12011	10856	16184	11196	Pgk1
ENSMUSG00000033768	5893	6023	5460	16659	12504	12281	10640	8823	10556	Nrxn2
ENSMUSG00000045983	15628	15149	15410	7057	7753	7905	6011	5667	6511	Eif4g1
ENSMUSG00000022892	5071	4655	5254	15177	15418	15800	20376	19994	21497	App
ENSMUSG00000059796	22656	21352	19090	3646	4418	4802	3539	5596	3756	Eif4a1
ENSMUSG00000001175	16273	14695	14234	6959	7107	7164	7099	8890	7278	Calm1
ENSMUSG00000031996	9076	8203	9187	10957	10443	11455	12191	11296	11996	Aplp2
ENSMUSG00000033577	3553	3049	4345	15443	12741	13099	10055	8954	10289	Myo6
ENSMUSG00000039218	10537	10130	13604	10952	8939	7675	8484	3978	8283	Srrm2
ENSMUSG00000014602	8543	8549	8344	11220	11265	11570	12058	8399	14304	Kif1a
ENSMUSG00000055065	10019	9666	10422	11174	10888	10958	10116	7225	11339	Ddx17
ENSMUSG00000021910	11171	11559	11324	10264	9072	9350	8277	6467	8870	Nisch
ENSMUSG00000003814	9696	13357	11857	9842	9336	10636	6335	5935	6040	Calr
ENSMUSG00000023915	4045	4297	4297	12243	11504	12353	11370	9626	10628	Tnfrsf21
ENSMUSG00000033161	6975	7511	7014	6563	9166	8339	33523	31751	26373	Atp1a1
ENSMUSG00000036427	9387	10415	9147	11187	9585	9265	11484	13558	11887	Gpi1
ENSMUSG00000006800	9896	10271	8775	6060	7409	8303	20628	16992	16301	Sulf2
ENSMUSG00000020859	6511	4348	8022	12390	12122	11244	9641	8192	10343	Spag9
ENSMUSG00000001924	14179	14184	13192	7726	7089	7797	6544	5915	6634	Uba1
ENSMUSG00000022463	9782	10027	9024	7424	7630	7801	10018	7886	9748	Srebf2
ENSMUSG00000031517	11919	9334	11033	6101	6869	7381	5179	7073	6900	Gpm6a
ENSMUSG00000029064	12760	12269	11803	8404	8525	8981	6957	7742	7011	Gnb1
ENSMUSG00000001211	3767	4108	3640	18754	17095	16656	9248	8120	9514	Agpat3
ENSMUSG00000021270	12336	6198	14076	7177	8987	7879	9409	12639	9168	Hsp90aa1
ENSMUSG00000003970	16043	17453	13391	5359	5010	5035	3919	5621	4164	Rpl8
ENSMUSG00000007892	14553	16858	12745	5121	4973	4969	3784	6888	4608	Rplp1
ENSMUSG00000021577	6647	6194	6462	12002	10937	10578	13438	15099	13539	Sdha
ENSMUSG00000013089	14643	15819	11980	10865	9719	10547	456	519	972	Etv5
ENSMUSG00000078812	18728	19617	15868	4264	4306	4471	3427	4639	3589	Eif5a
ENSMUSG00000031885	3833	2870	3470	11731	13992	16001	1871	2435	2721	Cbfb
ENSMUSG00000022961	9200	6919	10051	9498	9644	8833	9028	6159	9554	Son
ENSMUSG00000020321	7199	7996	6927	10341	10337	9859	11613	18532	11633	Mdh1
ENSMUSG00000037242	10252	10019	10879	9206	10247	11393	3817	3660	4382	Clic4
ENSMUSG00000110631	4858	4566	9523	8326	9850	12338	6920	6298	12417	Gm42047
ENSMUSG00000041936	5046	4900	5298	11369	10624	11126	5870	5060	7684	Agrn
ENSMUSG00000010277	9407	8544	8203	9172	9916	9707	7265	5619	7442	2610507B11Rik
ENSMUSG00000020598	2172	1839	2105	12212	16087	14930	9467	10017	12758	Nrcam
ENSMUSG00000025132	15115	16930	13776	6065	5331	5618	4936	5761	5263	Arhgdia
ENSMUSG00000043716	13936	14810	12767	5246	5560	5566	4427	6923	5239	Rpl7
ENSMUSG00000005871	10292	6203	11125	11032	10993	8846	8153	5617	8354	Apc
ENSMUSG00000028081	15681	15644	13601	4503	4499	4637	3128	5602	4031	Rps3a1
ENSMUSG00000024359	10939	10504	11171	8231	8792	8745	8115	10213	8316	Hspa9
ENSMUSG00000020372	17121	17968	13946	4250	4531	4718	3091	4698	3532	Rack1
ENSMUSG00000045962	9139	6832	10244	8954	8070	8297	8512	5036	9215	Wnk1
ENSMUSG00000019370	9429	8819	7092	9425	7964	8384	9395	11337	9266	Calm3
ENSMUSG00000017390	2334	3467	2866	13351	9597	8678	25299	29573	24598	Aldoc
ENSMUSG00000040997	3976	4905	4130	12591	11706	11983	16702	17272	16479	Abhd4
ENSMUSG00000024740	11299	11665	10236	7768	7438	7823	7783	7476	8055	Ddb1
ENSMUSG00000058672	11945	13332	10036	4712	9148	9892	7994	11071	8186	Tubb2a
ENSMUSG00000032482	3321	3616	3458	13138	7877	9211	2612	3375	3577	Cspg5
ENSMUSG00000035901	9082	9020	9260	9604	9716	10206	5967	5525	7097	Dennd5a
ENSMUSG00000021939	2692	2741	2418	13435	12679	12455	20172	22682	18151	Ctsb
ENSMUSG00000033981	4017	3309	7600	11521	11421	8586	3320	3085	4550	Gria2
ENSMUSG00000003534	6093	6795	5947	7248	7186	7425	20789	20304	21429	Ddr1
ENSMUSG00000013236	8760	9120	9368	9493	7223	6565	9643	6412	9172	Ptprs
ENSMUSG00000060961	1261	1388	1841	18611	18906	18117	8074	5509	7018	Slc4a4
ENSMUSG00000020349	9387	8542	8325	9259	8826	8890	8059	10685	9420	Ppp2ca
ENSMUSG00000028452	10945	11071	11642	7695	7404	7344	7770	8791	7527	Vcp
ENSMUSG00000031790	12784	13811	13873	2739	2505	3474	1407	859	1351	Mmp15
ENSMUSG00000036766	2797	3263	3029	14180	13107	14190	12322	11970	11888	Dner
ENSMUSG00000033059	1108	1061	878	16725	12139	11759	30455	29721	28811	Pygb
ENSMUSG00000002274	10289	10361	7203	8052	7063	7001	3682	5360	4060	Metrn
ENSMUSG00000059248	13857	15786	13673	3374	4449	4541	1396	1672	1508	Septin9
ENSMUSG00000022283	14436	11111	12731	5039	4736	4843	5915	5877	5215	Pabpc1
ENSMUSG00000019179	7732	8574	6951	8536	8412	8516	9382	12665	9060	Mdh2
ENSMUSG00000039621	4701	5020	4720	10723	11496	12033	10042	8340	10106	Prex1
ENSMUSG00000019843	10506	10977	11954	7128	7328	6815	3250	3384	3819	Fyn
ENSMUSG00000031320	14473	15144	13215	3948	4282	4409	2861	4731	3161	Rps4x
ENSMUSG00000020402	7720	8609	7505	8470	8343	7863	9251	10806	8670	Vdac1
ENSMUSG00000001847	8790	8724	8358	7710	8017	8197	7242	7832	7315	Rac1
ENSMUSG00000019505	10525	12639	9060	7780	6603	5789	6205	8119	5803	Ubb
ENSMUSG00000030744	13556	15391	11687	4901	4464	4480	3443	5262	3990	Rps3
ENSMUSG00000024665	6390	6344	5772	7327	6583	6493	12839	13151	11969	Fads2
ENSMUSG00000018965	5941	5739	5594	6816	8940	9220	6365	7165	7102	Ywhah
ENSMUSG00000063870	10247	8824	9554	8232	6647	6367	6162	5031	6367	Chd4
ENSMUSG00000038375	4814	5844	5411	9880	8635	9275	9427	8505	8307	Trp53inp2
ENSMUSG00000046434	12848	10750	13955	2794	3273	3131	2390	2794	2416	Hnrnpa1
ENSMUSG00000026864	7737	8209	10755	6737	5949	7463	6334	5723	5736	Hspa5
ENSMUSG00000022186	5555	4026	4414	12131	11616	12946	9336	10516	10338	Oxct1
ENSMUSG00000000631	4297	4959	5441	12402	12599	13053	4208	3055	3815	Myo18a
ENSMUSG00000024758	7608	6973	6612	8573	8990	9395	8516	10278	9190	Rtn3
ENSMUSG00000028820	13099	12096	12414	4670	4911	5422	4402	3695	4636	Sfpq
ENSMUSG00000006333	12717	13012	10603	5329	4606	4661	3812	5721	4109	Rps9
ENSMUSG00000030246	2675	2903	2497	12079	11131	10673	16491	25182	17376	Ldhb
ENSMUSG00000007891	3511	4378	3686	8556	9445	9789	15735	22807	15501	Ctsd
ENSMUSG00000027893	6234	6425	7072	8062	7424	7178	7002	6113	6685	Ahcyl1
ENSMUSG00000018770	7324	8791	6902	8054	7800	7116	7752	11588	8085	Atp5g3
ENSMUSG00000054555	8487	7106	8038	6709	8516	10099	428	354	517	Adam12
ENSMUSG00000001440	13895	10408	10607	5033	5281	5687	4452	4155	4755	Kpnb1
ENSMUSG00000024109	3903	2758	4636	14032	14823	13802	6178	5380	9058	Nrxn1
ENSMUSG00000042613	3528	3992	3536	12877	11161	10770	14482	13642	14124	Pbxip1
ENSMUSG00000009418	3897	3062	4244	5990	8555	8633	10532	4395	8897	Nav1
ENSMUSG00000020585	5085	5524	4921	9673	9540	9337	14190	18237	14861	Laptm4a
ENSMUSG00000007836	12334	12082	9823	5861	4675	4481	4479	4901	4227	Hnrnpa0
ENSMUSG00000040785	11698	7432	13308	5426	5257	5493	6208	5050	6423	Ttc3
ENSMUSG00000026234	13976	7768	14291	5604	6668	5697	5239	6331	5353	Ncl
ENSMUSG00000000787	12735	7414	12397	7710	8810	6631	7362	8966	6953	Ddx3x
ENSMUSG00000006205	1274	1495	1304	31258	27988	26791	3434	6134	5649	Htra1
ENSMUSG00000027533	7480	7759	6517	6094	5554	6057	3171	3987	3372	Fabp5
ENSMUSG00000030120	7346	8281	7011	9550	8162	7787	7156	8956	7474	Mlf2
ENSMUSG00000064368	5065	3383	6661	11723	14256	10824	16370	22700	14525	mt-Nd6
ENSMUSG00000007817	6224	6267	6942	8034	10140	9253	7941	4925	8106	Zmiz1
ENSMUSG00000028691	6962	7262	5763	9190	11370	11335	8574	15213	10006	Prdx1
ENSMUSG00000063229	11054	11074	8913	6140	5641	6020	6431	9069	6893	Ldha
ENSMUSG00000027184	10024	7339	9920	5013	5290	6296	5755	5074	6484	Caprin1
ENSMUSG00000021071	7939	8174	11421	8606	5545	6270	3326	2496	2917	Trim9
ENSMUSG00000019558	1151	1200	1090	12586	12688	12319	18441	18408	18186	Slc6a8
ENSMUSG00000020326	7784	5630	8418	5917	5783	6738	10269	11646	10334	Ccng1
ENSMUSG00000043496	3066	3646	2739	11221	11727	12012	5319	5386	6283	Tril
ENSMUSG00000026923	6251	6158	4873	7341	7977	7244	6703	3599	7655	Notch1
ENSMUSG00000041028	3759	3769	3924	11696	11977	11462	10278	12895	11566	Ghitm
ENSMUSG00000023004	15953	13570	9957	1935	3018	3451	7885	13270	7776	Tuba1b
ENSMUSG00000038014	8829	7673	8990	5422	5351	6209	5761	5081	5840	Fam120a
ENSMUSG00000060743	9150	9252	8014	5340	5289	5553	5819	7904	6462	H3f3a
ENSMUSG00000006699	9142	8713	8870	6257	6835	7002	6495	8515	6775	Cdc42
ENSMUSG00000031818	6029	6780	5415	9081	7354	7175	8255	12924	8536	Cox4i1
ENSMUSG00000018593	3127	3826	2800	6997	7590	7063	25012	31089	29199	Sparc
ENSMUSG00000033065	1834	2151	2123	15074	12169	12318	14082	13752	13380	Pfkm
ENSMUSG00000053477	8951	6260	10506	9128	7649	6182	6241	4887	5830	Tcf4
ENSMUSG00000058254	2086	1915	1922	12620	11609	13490	3099	4231	4422	Tspan7
ENSMUSG00000032479	8951	9484	9593	6523	5530	5830	7654	6737	7390	Map4
ENSMUSG00000094483	8826	5641	8187	6221	7600	7745	7066	6050	6646	Purb
ENSMUSG00000028078	4571	4574	5135	6880	6577	6016	5310	4043	5448	Dclk2
ENSMUSG00000016559	10445	9097	8720	5304	4994	4204	4851	5665	4321	H3f3b
ENSMUSG00000028367	9862	9090	10485	3428	3299	3543	1481	2356	1654	Txn1
ENSMUSG00000058558	11630	10870	10785	4718	5035	4760	3041	5016	3502	Rpl5
ENSMUSG00000028194	8873	9262	8661	4684	5579	6210	5764	5712	6326	Ddah1
ENSMUSG00000045515	7927	6256	6016	8532	6944	7093	3755	4089	4408	Pou3f3
ENSMUSG00000032959	9172	9575	7800	5299	5342	4701	5707	8359	5447	Pebp1
ENSMUSG00000026587	3224	3392	3570	9883	10655	11077	4590	4004	5593	Astn1
ENSMUSG00000097156	3536	3757	4083	8361	9955	9157	1618	2141	2807	Gm3764
ENSMUSG00000025651	6020	7348	5825	7828	7081	7372	8689	10084	7821	Uqcrc1
ENSMUSG00000071644	13008	13474	11451	4118	4152	4697	3302	4535	3790	Eef1g
ENSMUSG00000007564	8550	9381	7635	6035	5794	6371	6326	7717	6560	Ppp2r1a
ENSMUSG00000024576	8052	7059	8229	5423	5399	5117	12300	12791	10969	Csnk1a1
ENSMUSG00000029840	6301	5223	6876	7647	8506	8467	11027	10159	10331	Mtpn
ENSMUSG00000093674	9711	12811	8749	4151	2711	3363	3951	6745	4035	Rpl41
ENSMUSG00000021087	6414	6466	6351	6042	5503	6047	14053	14309	15644	Rtn1
ENSMUSG00000036333	4326	3198	5042	12114	9961	9353	11195	7956	12245	Kidins220
ENSMUSG00000030654	5939	4713	4193	6728	7203	7325	4920	6493	5480	Arl6ip1
ENSMUSG00000027002	7424	5160	7750	7824	8141	7956	6813	7004	7509	Nckap1
ENSMUSG00000010663	6528	6598	6093	5581	5004	5020	9219	9248	8571	Fads1
ENSMUSG00000029430	15211	14021	12433	2869	3316	3684	2716	3692	2785	Ran
ENSMUSG00000026131	4914	3254	5590	10744	10806	10133	13555	5913	13957	Dst
ENSMUSG00000041697	5317	6134	4947	8635	7311	6813	6566	10914	7457	Cox6a1
ENSMUSG00000020777	3260	3681	3491	9038	8574	9359	12734	11629	13172	Acox1
ENSMUSG00000021957	8679	9815	8366	5916	5666	5788	9143	10975	8892	Tkt
ENSMUSG00000027200	4053	3575	5424	7478	9536	9638	12693	8013	11515	Sema6d
ENSMUSG00000020361	8549	6793	8566	4986	5650	6061	8119	8202	7516	Hspa4
ENSMUSG00000053062	5561	4400	5800	7586	9310	8718	5718	6024	6548	Jam2
ENSMUSG00000029614	13418	13168	10797	3506	3764	3827	2776	4541	3039	Rpl6
ENSMUSG00000025016	6528	4408	7237	7072	7670	7485	6195	6782	6276	Tm9sf3
ENSMUSG00000025261	9232	7345	8862	6553	5947	6088	5695	2609	5738	Huwe1
ENSMUSG00000029713	8377	9265	7820	5349	5185	5324	4783	6128	5085	Gnb2
ENSMUSG00000027248	7672	7592	8841	5500	6068	6497	5532	6440	5235	Pdia3
ENSMUSG00000042978	5065	5601	4545	9799	6944	6874	7403	7904	7563	Sbk1
ENSMUSG00000040731	10268	10211	8078	5136	4878	4894	4729	5899	4749	Eif4h
ENSMUSG00000011752	6732	7283	6005	7233	7242	7691	6892	7556	6824	Pgam1
ENSMUSG00000019124	3449	3890	3088	6375	10237	10222	5642	7024	7223	Scrn1
ENSMUSG00000004891	16584	14674	17836	305	370	372	1668	2155	1128	Nes
ENSMUSG00000067336	3878	2796	4187	7494	10786	9678	7620	5606	7295	Bmpr2
ENSMUSG00000039579	1026	864	1270	11475	12908	13405	6112	4599	6881	Grin3a
ENSMUSG00000021796	2821	1735	2947	8845	10148	9304	12543	13032	12924	Bmpr1a
ENSMUSG00000054871	718	918	709	8405	12340	13320	3638	5039	4119	Tmem158
ENSMUSG00000025980	10322	8285	11352	4684	5006	5296	4018	4991	4014	Hspd1
ENSMUSG00000051223	9258	6808	8835	4637	5731	5414	4427	5112	4275	Bzw1
ENSMUSG00000020358	14859	12386	11004	2580	2750	2876	2011	2628	2299	Hnrnpab
ENSMUSG00000030704	10269	8641	10357	6434	5501	5470	5654	6836	6507	Rab6a
ENSMUSG00000075702	260	287	240	16691	10438	10848	2069	3343	2548	Selenom
ENSMUSG00000021282	8374	6022	9376	6384	6330	5760	6752	8824	6647	Eif5
ENSMUSG00000020601	9748	9104	8447	4759	5256	6024	393	477	910	Trib2
ENSMUSG00000025931	945	949	724	14269	14578	11964	9326	11818	10889	Paqr8
ENSMUSG00000024501	6524	5623	6205	4061	4011	4664	6125	4655	5628	Dpysl3
ENSMUSG00000025745	4373	4518	4494	9439	8337	8779	7841	7949	8544	Hadha
ENSMUSG00000047675	13438	12072	10896	3071	3113	3357	2054	3384	2489	Rps8
ENSMUSG00000011179	6456	6593	5309	5741	9310	8923	7035	9462	7000	Odc1
ENSMUSG00000020917	8276	9055	9942	3000	3318	3082	3326	3218	3786	Acly
ENSMUSG00000039953	5693	5757	5082	9378	8062	7794	6338	6181	6539	Clstn1
ENSMUSG00000020850	9111	8316	8186	5027	5454	5338	5657	3692	5535	Prpf8
ENSMUSG00000017404	10684	12375	9456	3616	3585	3866	2897	4574	3012	Rpl19
ENSMUSG00000020607	4280	2747	3165	10859	11457	11320	9075	11129	12264	Lratd1
ENSMUSG00000028495	11790	13403	10597	3164	3007	2907	2253	3610	2590	Rps6
ENSMUSG00000021670	4294	4339	5598	2993	5164	4702	2818	3661	4084	Hmgcr
ENSMUSG00000022199	4331	5382	4703	7240	6232	6142	8061	8297	8108	Slc22a17
ENSMUSG00000054452	9300	10212	8187	5619	4407	4264	3324	4350	3978	Tle5
ENSMUSG00000022108	3692	3731	3403	9389	8833	8798	9203	11887	9796	Itm2b
ENSMUSG00000005417	6142	6197	6202	7396	6470	6516	7117	5257	6655	Mprip
ENSMUSG00000048076	8431	9295	7879	5239	5416	5245	4507	5894	4766	Arf1
ENSMUSG00000076431	8020	7402	8063	6605	3750	3826	5738	4613	5379	Sox4
ENSMUSG00000006998	8591	8603	8102	4900	5486	5597	4769	5551	5166	Psmd2
ENSMUSG00000058975	8469	9453	9865	3933	3073	3062	4116	2891	3769	Kcnc1
ENSMUSG00000036606	8373	8511	6992	4521	4470	4545	8370	6028	8569	Plxnb2
ENSMUSG00000030657	8694	8055	8860	2568	4606	4640	808	791	1079	Xylt1
ENSMUSG00000037503	7848	6779	6730	7182	7279	7233	5631	4959	6119	Fam168b
ENSMUSG00000020671	5629	4271	5612	7080	7239	7304	4552	4571	4424	Rab10
ENSMUSG00000035242	8669	8165	6773	5800	5261	5166	6617	10222	6219	Oaz1
ENSMUSG00000036371	10939	7986	10285	4326	4116	4199	3958	4153	4046	Serbp1
ENSMUSG00000024640	13363	12759	11040	3313	3103	3200	3541	4248	3458	Psat1
ENSMUSG00000048148	3239	2900	4066	10647	8877	9615	2575	1279	3094	Nwd1
ENSMUSG00000024608	9972	10717	8189	4457	3996	3917	2894	4641	3369	Rps14
ENSMUSG00000033295	4403	4410	4379	6371	6428	5954	15327	8115	13795	Ptprf
ENSMUSG00000026238	12550	10983	9382	3097	2956	2993	3175	3768	3054	Ptma
ENSMUSG00000055538	5103	5189	4808	8778	7050	6908	5097	5837	6054	Zcchc24
ENSMUSG00000032320	2202	2034	2030	9857	10607	10041	14113	22723	17920	Rcn2
ENSMUSG00000022240	5365	5302	5416	7714	7526	7114	4419	3379	4394	Ctnnd2
ENSMUSG00000030057	12003	12211	11669	3595	4107	4090	3755	5916	3992	Cnbp
ENSMUSG00000019877	5029	4023	5372	7797	8240	7944	7218	9225	8156	Serinc1
ENSMUSG00000045128	11819	12309	9958	2886	2887	2975	2082	3479	2322	Rpl18a
ENSMUSG00000024238	9630	6866	12059	3632	3700	3892	2052	1671	2297	Zeb1
ENSMUSG00000067786	5097	6089	4517	1104	1428	1711	633	553	542	Nnat
ENSMUSG00000000563	6311	6310	5776	5535	6062	5887	6394	9442	6267	Atp5pb
ENSMUSG00000020611	3342	2936	3118	8295	10374	8663	8824	9902	10588	Gna13
ENSMUSG00000032009	3928	2855	3501	11100	8730	7661	7787	5458	8748	Sesn3
ENSMUSG00000013033	4527	4307	4296	10542	10125	8611	4871	3674	5347	Adgrl1
ENSMUSG00000035885	4825	5750	4313	7902	6424	5952	5326	8229	6468	Cox8a
ENSMUSG00000031760	911	2165	1186	11053	7584	6730	16105	22086	15557	Mt3
ENSMUSG00000015829	818	700	1391	13726	11548	10946	22565	8666	23577	Tnr
ENSMUSG00000009470	10868	7191	9505	4076	4860	4750	4489	3602	4754	Tnpo1
ENSMUSG00000020745	5777	3755	6067	6980	6799	6878	6811	7112	6744	Pafah1b1
ENSMUSG00000052512	3040	3713	3669	7397	11040	9804	8832	5335	9325	Nav2
ENSMUSG00000060261	6337	5853	6444	5690	4749	5504	5635	4717	6120	Gtf2i
ENSMUSG00000015165	9667	9076	7571	3561	3872	3573	3504	3352	3347	Hnrnpl
ENSMUSG00000001911	4130	3590	3271	7669	6742	6724	9134	6129	9005	Nfix
ENSMUSG00000025362	10994	11167	9555	2401	2511	2761	1868	3256	2125	Rps26
ENSMUSG00000023067	7899	8769	7197	6516	5149	4998	7649	9507	7809	Cdkn1a
ENSMUSG00000030122	6393	7601	5901	6109	4066	3839	6575	8326	6751	Ptms
ENSMUSG00000031422	6674	6125	6184	4586	6971	6778	7756	9706	8078	Morf4l2
ENSMUSG00000028273	5181	4258	5474	5863	5832	5765	8293	8537	9418	Pdlim5
ENSMUSG00000031924	5606	5068	5720	6220	7309	6976	6234	6733	7044	Cyb5b
ENSMUSG00000022272	4689	4918	3852	9078	6603	5220	9142	7844	10440	Myo10
ENSMUSG00000024143	5009	3594	5340	5952	6921	8615	2722	3607	3724	Rhoq
ENSMUSG00000039262	7388	6815	7154	5442	4880	5174	5072	2583	5044	Prrc2b
ENSMUSG00000040010	8154	8104	7887	5803	7122	6971	2724	2661	3530	Slc7a5
ENSMUSG00000055302	7713	7587	7024	4699	4658	4560	3974	5398	3920	Mrfap1
ENSMUSG00000001467	5183	6158	6498	2715	4568	4118	2956	5556	4699	Cyp51
ENSMUSG00000079477	5759	5814	5771	6432	6103	6498	6077	7073	6492	Rab7
ENSMUSG00000025130	7473	7926	6752	4736	5257	5538	3695	4428	3862	P4hb
ENSMUSG00000031207	10572	11027	11169	2877	3003	2965	6500	6129	6300	Msn
ENSMUSG00000025781	6270	7186	5378	5514	5572	5494	5197	7557	5311	Atp5c1
ENSMUSG00000005161	6117	6977	5439	5383	5080	4830	6873	10276	6856	Prdx2
ENSMUSG00000029050	3407	3661	3429	7181	8107	8495	10669	8831	11451	Ski
ENSMUSG00000048578	4984	5216	5033	6937	6364	6454	6793	5301	5494	Mlec
ENSMUSG00000061477	11657	10298	8723	2787	3296	3475	2578	3913	2826	Rps7
ENSMUSG00000022443	7314	6673	8290	4123	3785	4351	4368	3178	4490	Myh9
ENSMUSG00000008734	2555	2394	2074	12829	10811	9482	11639	9842	12438	Gprc5b
ENSMUSG00000015749	7407	5068	6296	3899	4342	4335	2312	2378	2416	Anp32e
ENSMUSG00000011831	1463	867	1820	11894	15883	15465	6370	6884	7328	Evi5
ENSMUSG00000010064	1116	1204	1160	11452	13457	13880	8217	7528	5831	Slc38a3
ENSMUSG00000029767	6619	6150	6562	5547	5801	5591	4165	5108	4330	Calu
ENSMUSG00000025290	9246	9917	8888	3124	3133	3001	2312	3777	2644	Rps24
ENSMUSG00000030088	10150	11542	8962	1796	1632	1617	4278	4732	3821	Aldh1l1
ENSMUSG00000031700	4180	4313	3923	5445	6247	7094	4957	4705	4766	Gpt2
ENSMUSG00000027828	6861	5800	6366	4798	5584	5306	4717	5743	4674	Ssr3
ENSMUSG00000053907	6796	6954	6299	5550	7156	5879	10317	13160	10397	Mat2a
ENSMUSG00000015243	471	294	234	15653	15902	12115	10399	8457	12553	Abca1
ENSMUSG00000038776	4573	5154	3903	6957	6374	6483	10068	12604	11127	Ephx1
ENSMUSG00000026553	6410	6493	6463	5178	5258	5685	5131	4947	5412	Copa
ENSMUSG00000029581	12245	13544	10234	2588	1967	2150	4268	4228	3952	Fscn1
ENSMUSG00000029778	8926	9713	7583	1671	907	965	8141	4871	7424	Adcyap1r1
ENSMUSG00000037072	5980	5911	5158	5319	5853	5762	4162	6679	4727	Selenof
ENSMUSG00000046364	10520	11696	9456	2698	2705	2678	1933	3214	2235	Rpl27a
ENSMUSG00000026932	1587	1723	1281	12795	12757	12680	10398	9365	13295	Nacc2
ENSMUSG00000022314	7925	4987	4995	4601	5200	5189	3528	3821	3864	Rad21
ENSMUSG00000066324	7022	4279	6421	4962	5777	5516	3938	3866	4084	Bpnt2
ENSMUSG00000025982	7528	4800	7470	4917	5035	4604	4689	4745	4489	Sf3b1
ENSMUSG00000001833	5241	3122	6098	6374	7472	6841	3180	4187	3392	Septin7
ENSMUSG00000008668	10200	12422	9376	2850	2479	1860	1844	2785	2053	Rps18
ENSMUSG00000036591	4931	3780	4988	5761	6287	5923	5764	3850	5775	Arhgap21
ENSMUSG00000051853	6406	6668	6384	5364	5458	5649	5631	5577	5670	Arf3
ENSMUSG00000021218	7488	6136	6566	4360	4924	5280	5471	6601	5127	Gdi2
ENSMUSG00000024425	5735	6720	6300	4551	4681	4818	5101	6358	4944	Ndfip1
ENSMUSG00000024335	5991	6431	5615	6239	6067	5620	4839	4848	5130	Brd2
ENSMUSG00000012848	11174	12335	9208	2367	2574	2662	1903	2952	2077	Rps5
ENSMUSG00000024176	4697	5652	4679	5835	7195	7565	1167	1363	1688	Sox8
ENSMUSG00000036309	4167	4159	4097	6545	8699	8229	10045	16921	11345	Skp1
ENSMUSG00000056612	10899	12091	8926	2599	2102	2244	1580	2335	1692	Ppp1r14b
ENSMUSG00000031311	10612	9442	8324	3070	2994	3239	2968	3010	3026	Nono
ENSMUSG00000062397	3305	3375	3097	4633	5472	5831	7954	9523	8482	Zfp706
ENSMUSG00000032050	4775	2786	4427	4864	6029	5914	9712	9763	9568	Rdx
ENSMUSG00000076432	10251	9869	9179	2913	3136	3134	3666	4844	3796	Ywhaq
ENSMUSG00000031453	5866	6070	6133	3977	4267	5104	1015	978	1181	Rasa3
ENSMUSG00000007815	6330	6596	5904	4877	5083	5295	5053	5789	5333	Rhoa
ENSMUSG00000057880	817	850	794	13259	12456	13150	11784	8921	12859	Abat
ENSMUSG00000037458	3196	2350	2822	6890	7330	7214	7528	8668	7051	Azin1
ENSMUSG00000037487	5101	3494	5071	5581	6476	5850	10605	7954	10455	Ubr5
ENSMUSG00000022551	5492	6006	4682	6156	5616	5723	5234	6502	5214	Cyc1
ENSMUSG00000030795	8663	7762	7302	4156	4346	3972	3797	4062	4004	Fus
ENSMUSG00000041417	5948	4246	6072	6885	5117	4258	7448	6982	7417	Pik3r1
ENSMUSG00000024654	3313	3135	2441	5937	6672	7504	7983	8344	8992	Asrgl1
ENSMUSG00000027397	2042	1767	1768	12359	13461	12566	5728	8929	7711	Slc20a1
ENSMUSG00000020048	5147	3566	7153	5808	6184	6010	3933	4831	4238	Hsp90b1
ENSMUSG00000024991	6843	4430	8667	5613	5604	5184	4398	4805	4830	Eif3a
ENSMUSG00000102918	4079	4121	3358	6627	7714	8409	3131	2389	3648	Pcdhgc3
ENSMUSG00000027479	6683	5207	5421	4974	5183	5337	5465	6350	6348	Mapre1
ENSMUSG00000013593	4607	5287	4501	6204	5763	5589	6101	8319	6518	Ndufs2
ENSMUSG00000023175	4277	4796	3908	6614	6244	6357	6547	8499	6231	Bsg
ENSMUSG00000021771	6214	6666	5755	5039	5130	5007	4225	5766	4014	Vdac2
ENSMUSG00000036438	11260	9349	9390	3383	3615	3448	2321	3807	2430	Calm2
ENSMUSG00000027797	6508	4699	7378	3579	3075	3389	7436	6431	6309	Dclk1
ENSMUSG00000018326	8089	6614	7262	4367	4613	4889	4921	4651	4937	Ywhab
ENSMUSG00000028692	6184	6910	5394	5329	4749	4815	5046	7128	5469	Akr1a1
ENSMUSG00000024413	2189	2225	2013	8345	8586	7565	6128	5432	7796	Npc1
ENSMUSG00000027303	4392	4207	4270	7154	6553	6460	4727	4663	6046	Ptpra
ENSMUSG00000042331	4557	4361	5114	5297	4716	4620	3438	2774	4336	Specc1
ENSMUSG00000074637	7068	5525	4717	4918	3959	4159	4051	4866	4830	Sox2
ENSMUSG00000059495	3120	2496	3762	9333	9275	9354	7248	4875	8407	Arhgef12
ENSMUSG00000039278	934	1067	920	11219	8803	8530	9338	13574	9382	Pcsk1n
ENSMUSG00000041548	66	65	86	8665	7764	6516	35780	41140	35854	Hspb8
ENSMUSG00000032186	5986	4368	7080	5246	4927	4515	6353	4166	5946	Tmod2
ENSMUSG00000000594	1277	1569	1070	10144	10641	10685	4848	5842	6160	Gm2a
ENSMUSG00000045294	3733	4402	4455	3718	6075	4620	3872	6734	6534	Insig1
ENSMUSG00000001036	5909	4938	6076	3963	4027	6109	1114	1221	1280	Epn2
ENSMUSG00000050708	8329	9311	7013	4347	3564	3555	4651	8447	5568	Ftl1
ENSMUSG00000027668	2975	2349	3186	8989	9781	8325	4157	4956	4410	Mfn1
ENSMUSG00000012405	8201	9984	7639	3444	3436	3130	2692	3799	3006	Rpl15
ENSMUSG00000029426	4279	3930	3795	5491	5242	4857	9953	10643	11552	Scarb2
ENSMUSG00000059291	9322	9277	7329	3246	2905	2787	2408	4097	2795	Rpl11
ENSMUSG00000027087	2646	2262	3146	6856	9664	9942	1592	1528	1988	Itgav
ENSMUSG00000022841	5734	6029	5436	5157	5044	4869	4920	6066	5458	Ap2m1
ENSMUSG00000034158	4184	3221	4741	7546	8182	6786	4881	4928	5509	Lrrc58
ENSMUSG00000037805	8864	10437	8486	2516	2549	2510	1964	3062	2033	Rpl10a
ENSMUSG00000024304	4775	3953	3925	7771	8262	7504	5393	6157	5935	Cdh2
ENSMUSG00000020914	11727	4374	6045	1386	2118	2683	366	310	442	Top2a
ENSMUSG00000036402	4202	3259	4225	5528	6069	6004	3253	3083	3726	Gng12
ENSMUSG00000032187	7837	7293	7314	3007	2895	3461	3114	2373	3091	Smarca4
ENSMUSG00000102869	4797	3557	4709	6850	6713	7260	5402	5016	5662	Norad
ENSMUSG00000027422	3201	2946	3694	6923	7145	7183	3515	3580	4881	Rrbp1
ENSMUSG00000032228	11837	9243	11399	2080	2001	2284	2098	1695	2161	Tcf12
ENSMUSG00000057897	12036	14530	13683	567	593	640	454	467	471	Camk2b
ENSMUSG00000047945	10330	10705	8194	1194	910	1053	2836	3348	2386	Marcksl1
ENSMUSG00000075700	4440	3273	5648	5207	6044	5754	4965	6125	5187	Selenot
ENSMUSG00000029571	2592	1560	2648	9007	8752	8655	6539	6012	7582	Tmem106b
ENSMUSG00000066036	5862	5666	5835	6007	5669	5834	5635	2629	5806	Ubr4
ENSMUSG00000040225	5892	4512	6508	6119	5295	4682	6801	3096	6344	Prrc2c
ENSMUSG00000037373	7319	7509	6412	3915	4140	4023	3520	4050	3758	Ctbp1
ENSMUSG00000043733	5174	4624	4409	6692	6775	6643	5935	5720	6315	Ptpn11
ENSMUSG00000040952	8273	9943	7327	2880	2276	2278	1945	3190	2175	Rps19
ENSMUSG00000020458	6808	5167	6829	4803	4502	3959	9931	11188	9909	Rtn4
ENSMUSG00000059070	9174	10446	7529	3182	2648	2563	2002	3034	2067	Rpl18
ENSMUSG00000003316	5300	4590	5167	6102	5391	5408	4308	2756	4586	Glg1
ENSMUSG00000031299	3684	3170	3604	6677	6734	6424	6538	7557	6950	Pdha1
ENSMUSG00000016921	8672	7574	6839	4158	4531	4332	4028	4821	4120	Srsf6
ENSMUSG00000030342	1451	1773	1470	7934	9256	9394	3326	4735	3487	Cd9
ENSMUSG00000031565	4064	3881	3667	6984	7067	7330	5112	5039	5373	Fgfr1
ENSMUSG00000024392	6793	6955	6070	4517	3926	3814	3846	3236	3853	Bag6
ENSMUSG00000031748	2315	2273	2559	11302	9315	9067	5053	4542	5337	Gnao1
ENSMUSG00000005566	9661	9522	7519	2722	2998	3036	2614	2760	2605	Trim28
ENSMUSG00000049354	6110	6070	5040	5112	5110	5240	4962	4036	5298	Dcaf7
ENSMUSG00000032349	3704	3746	3810	6398	6758	6577	4805	5005	4742	Elovl5
ENSMUSG00000058793	3379	3526	3567	8157	7332	7167	6119	4962	6275	Cds2
ENSMUSG00000016541	5464	6330	5260	4434	4627	4739	4406	5484	4509	Atxn10
ENSMUSG00000024811	4893	3431	5279	4850	5472	5422	4916	4858	5212	Tnks2
ENSMUSG00000020431	2911	2866	2982	7390	9174	9048	7146	4166	8245	Adcy1
ENSMUSG00000004789	4223	4604	4370	5566	4751	5172	5462	5502	5570	Dlst
ENSMUSG00000053931	6743	7361	6677	3276	3528	3761	7473	9509	7556	Cnn3
ENSMUSG00000030662	10459	7640	8256	2538	3411	3618	2304	2135	2236	Ipo5
ENSMUSG00000018379	8677	5904	7818	2939	3387	3381	2999	3259	3076	Srsf1
ENSMUSG00000029478	8180	9219	7237	3454	3558	3682	2254	1261	2507	Ncor2
ENSMUSG00000037062	3900	2776	3889	5048	6118	6196	5178	4581	5209	Sh3glb1
ENSMUSG00000027111	6256	5507	6417	4994	4804	4387	3926	3844	4816	Itga6
ENSMUSG00000034593	6363	3836	6420	4207	4667	4557	2248	1754	2793	Myo5a
ENSMUSG00000009079	7259	6399	6335	4028	4350	3871	3640	3742	3668	Ewsr1
ENSMUSG00000023456	4728	5277	3918	5334	3967	4215	5162	7001	5263	Tpi1
ENSMUSG00000068267	5879	5952	4559	6173	5108	4946	3555	4114	4044	Cenpb
ENSMUSG00000032279	4605	4133	4677	4758	5055	5147	4343	5465	4216	Idh3a
ENSMUSG00000032097	6903	4658	5657	4032	4208	4018	3732	2962	4084	Ddx6
ENSMUSG00000038462	3914	4625	3597	5645	5881	5638	5700	8624	5648	Uqcrfs1
ENSMUSG00000001472	4975	5445	4918	5711	5278	5237	6215	5917	6127	Tcf25
ENSMUSG00000063457	7622	9179	6633	3365	2898	2973	2190	3440	2528	Rps15
ENSMUSG00000007850	6516	4551	7900	2828	3631	3343	4444	5224	4039	Hnrnph1
ENSMUSG00000035152	5802	5851	5895	4405	4298	4710	5229	4107	4825	Ap2b1
ENSMUSG00000029106	3728	3997	3603	5686	5352	5602	5984	6066	6693	Add1
ENSMUSG00000031751	4758	4998	4293	5799	6008	5893	6578	7686	6853	Amfr
ENSMUSG00000060373	7436	7341	6715	3956	3880	4086	4400	5446	4691	Hnrnpc
ENSMUSG00000022995	2948	2180	3002	7377	6978	7042	6535	5602	6491	Enah
ENSMUSG00000071172	9662	8479	7962	2927	3243	3103	2969	4319	3116	Srsf3
ENSMUSG00000046668	1217	1025	1109	6775	8096	8058	7027	8044	8339	Cxxc5
ENSMUSG00000049470	5279	3496	5284	5730	5765	5304	6545	4710	6225	Aff4
ENSMUSG00000006728	10706	10355	8374	1832	1847	1979	1678	2117	1880	Cdk4
ENSMUSG00000057236	8302	8003	6391	2792	3173	3144	3276	4188	3424	Rbbp4
ENSMUSG00000022884	3487	2676	4635	5534	5576	5838	6521	8282	6844	Eif4a2
ENSMUSG00000006740	4998	3206	6489	4779	5464	4808	6373	6716	6355	Kif5b
ENSMUSG00000058799	8039	6073	7346	1946	3361	3769	1583	2065	1697	Nap1l1
ENSMUSG00000028517	2121	1992	1882	7508	5050	4822	7064	6009	7119	Plpp3
ENSMUSG00000047842	802	849	875	7248	10193	10716	3443	3467	5544	Diras2
ENSMUSG00000008682	9031	10865	8397	2405	2206	2229	1627	2558	1873	Rpl10
ENSMUSG00000042699	9505	5693	7760	2949	3726	3519	3022	2909	3162	Dhx9
ENSMUSG00000047215	7510	8885	7038	2746	2784	2702	2352	3758	2761	Rpl9
ENSMUSG00000030257	2134	1865	2216	7226	6466	6470	5516	3565	5812	Srgap3
ENSMUSG00000054793	2890	3261	2866	6102	5282	5086	5527	6998	5998	Cadm4
ENSMUSG00000028745	4531	5218	4579	5972	5422	5132	6767	9469	7142	Capzb
ENSMUSG00000063146	2688	2713	2907	6175	5910	6082	4158	4018	4991	Clip2
ENSMUSG00000062014	4155	3139	5006	5297	6291	5932	5361	6330	5296	Gmfb
ENSMUSG00000008140	5177	5801	4442	5359	4446	4570	3534	4398	3660	Emc10
ENSMUSG00000025613	9332	7765	9746	2682	2993	2893	2776	3822	2867	Cct8
ENSMUSG00000038733	4533	3593	5292	5292	5683	5070	4803	4356	4809	Wdr26
ENSMUSG00000051695	8028	9110	7010	3851	3031	2968	2978	3402	3210	Pcbp1
ENSMUSG00000026434	7378	4948	6067	2993	3805	3450	3414	3099	3609	Nucks1
ENSMUSG00000079037	3048	3271	2785	4068	3839	3855	16628	20604	14910	Prnp
ENSMUSG00000048458	6857	5705	5692	3244	3431	4662	1185	1023	1272	Inka2
ENSMUSG00000032060	682	888	537	3495	3209	3173	31019	44301	27351	Cryab
ENSMUSG00000040549	5157	2269	4511	4737	4332	4128	7073	6468	7065	Ckap5
ENSMUSG00000034160	3878	2879	4342	6964	5754	5523	6776	4994	6806	Ogt
ENSMUSG00000032966	8243	9294	7971	2589	2402	2700	2656	3420	2658	Fkbp1a
ENSMUSG00000029394	5283	5865	4000	4016	4767	4794	1945	2688	2781	Cdk2ap1
ENSMUSG00000044708	734	831	637	7019	10426	8500	11836	10715	12522	Kcnj10
ENSMUSG00000040479	4703	5505	4988	5795	3347	3681	1659	1548	1932	Dgkz
ENSMUSG00000034269	4678	4064	5242	4496	4777	4303	3073	2244	3233	Setd5
ENSMUSG00000010095	3657	3897	4040	7783	6448	5768	6272	9382	6656	Slc3a2
ENSMUSG00000003072	4294	5273	4034	5195	4579	4645	4647	6517	4545	Atp5d
ENSMUSG00000070493	5274	7396	4960	3971	3381	3218	4308	6210	4411	Chchd2
ENSMUSG00000029328	8402	6096	6469	2796	3841	3054	2506	3297	2474	Hnrnpdl
ENSMUSG00000028782	6113	6320	5318	3353	3440	3463	1537	1312	1785	Adgrb2
ENSMUSG00000057230	4802	4596	6922	3891	4298	4149	3261	2007	3529	Aak1
ENSMUSG00000005312	5597	5555	5441	4052	4108	4304	3883	4131	3987	Ubqln1
ENSMUSG00000030738	7308	7176	6837	3272	3476	3814	3391	3938	3549	Eif3c
ENSMUSG00000058230	6311	5467	5346	4069	3842	4299	3979	2509	4420	Arhgap35
ENSMUSG00000020422	3262	2965	2989	8328	8295	7561	8206	7231	8028	Tns3
ENSMUSG00000063358	6730	5997	5856	3298	3542	3643	3778	3729	3652	Mapk1
ENSMUSG00000019841	9338	5691	9555	2153	2262	1898	1691	1089	1722	Rev3l
ENSMUSG00000022351	5264	5428	5453	1749	2911	3021	3177	4614	4560	Sqle
ENSMUSG00000041740	5690	5764	5217	4896	4381	4532	4116	4147	4308	Rnf10
ENSMUSG00000105987	8881	7740	6977	1776	1835	2109	917	983	917	AI506816
ENSMUSG00000071650	5216	5393	5169	4138	3764	3927	3335	2854	3506	Ganab
ENSMUSG00000031386	7652	6653	5915	3157	3480	3310	2936	1688	2987	Hcfc1
ENSMUSG00000020644	1256	1560	1586	9015	8675	5578	9263	14641	8037	Id2
ENSMUSG00000032328	3456	2162	4080	5923	6500	6452	4919	6148	5035	Tmem30a
ENSMUSG00000069769	5515	4133	6122	5232	5047	4309	5525	3778	5069	Msi2
ENSMUSG00000034024	7991	8134	7649	2482	2925	3013	2790	3284	2750	Cct2
ENSMUSG00000049583	4935	3415	6173	1238	1649	2152	42	22	38	Grm5
ENSMUSG00000027620	4607	3058	6093	5344	5171	4458	5135	4954	4782	Rbm39
ENSMUSG00000024163	3677	4064	4735	5170	4084	4163	5689	4021	5315	Mapk8ip3
ENSMUSG00000018293	7934	9220	6832	2885	2451	2531	1937	2719	2024	Pfn1
ENSMUSG00000019923	6536	7001	6477	3909	4333	4183	3266	4965	3563	Zwint
ENSMUSG00000051855	12299	12677	11552	301	400	459	173	181	173	Mest
ENSMUSG00000030678	6500	6448	5405	3299	2797	2940	2289	2537	2775	Maz
ENSMUSG00000025228	5553	5902	4602	4120	3769	3683	3616	4093	3567	Actr1a
ENSMUSG00000031960	6453	6644	6445	4525	4068	4395	2379	2730	2767	Aars
ENSMUSG00000020496	5310	5701	4450	4418	4012	4236	4462	4987	4640	Rnf187
ENSMUSG00000034088	5456	5100	5235	4235	4152	4439	3693	2958	3948	Hdlbp
ENSMUSG00000058655	7597	7302	7122	3287	2827	2633	2360	2351	2587	Eif4b
ENSMUSG00000040945	9793	9700	7782	1816	1692	1826	1667	1651	1595	Rcc2
ENSMUSG00000027805	3938	4382	4065	3650	4784	4512	6478	7773	6057	Pfn2
ENSMUSG00000018846	4840	2954	5499	3086	3869	3743	3175	3225	3457	Pank3
ENSMUSG00000034612	4623	4644	5198	2330	2588	2863	4988	3241	3631	Chst11
ENSMUSG00000029705	2246	2133	2145	6062	7350	6970	7278	6279	7679	Cux1
ENSMUSG00000037563	7854	9095	6973	2264	2139	2167	1661	2899	1909	Rps16
ENSMUSG00000002981	3653	3765	3340	5421	5430	5648	4422	5283	5100	Clptm1
ENSMUSG00000044340	3099	3381	2816	6145	6007	6305	4488	3848	4809	Phlpp1
ENSMUSG00000026223	2982	3166	2562	4500	4407	4628	8518	8706	7697	Itm2c
ENSMUSG00000029447	8452	8118	7995	2498	2956	2776	2333	3344	2592	Cct6a
ENSMUSG00000029461	3083	2731	2969	5049	5333	5486	5952	4626	6363	Fam168a
ENSMUSG00000066357	5878	5721	4773	3249	3317	3255	3629	3473	3985	Wdr6
ENSMUSG00000038976	4027	4231	4402	4893	3581	3824	3654	2889	3238	Ppp1r9b
ENSMUSG00000034926	5079	5414	4512	2465	3005	2624	1755	1970	2239	Dhcr24
ENSMUSG00000021134	5073	4383	4819	5248	5038	4167	4774	6436	4821	Srsf5
ENSMUSG00000024507	3135	3232	3106	6259	5380	5501	4583	5437	4837	Hsd17b4
ENSMUSG00000030007	7569	7986	7016	2841	3033	3068	2547	3653	2696	Cct7
ENSMUSG00000024949	6413	6589	5913	4093	3978	3625	3222	2731	3379	Sf1
ENSMUSG00000027351	5501	4648	5661	4053	4693	4943	1814	1812	2165	Spred1
ENSMUSG00000036752	7103	5597	4167	1950	2571	2626	4995	6466	3816	Tubb4b
ENSMUSG00000032902	1477	1343	1374	1185	1525	1308	32825	40110	25153	Slc16a1
ENSMUSG00000009927	8327	9472	7291	1811	2150	2019	1443	2520	1764	Rps25
ENSMUSG00000001416	8098	8572	7551	2324	2785	3015	2452	3470	2609	Cct3
ENSMUSG00000019960	6765	7350	4070	1974	4589	5533	85	152	167	Dusp6
ENSMUSG00000022454	3340	3212	2848	11367	5676	8001	1423	1739	1696	Nell2
ENSMUSG00000036585	1309	1077	1961	9644	10125	11369	6985	6206	8068	Fgf1
ENSMUSG00000020483	3557	3608	3108	6149	5012	5450	5887	5964	5986	Dynll2
ENSMUSG00000031004	8764	3150	5544	1167	2105	1497	293	252	302	Mki67
ENSMUSG00000026219	5182	3323	5421	3688	4462	4220	4146	3281	4427	Trip12
ENSMUSG00000055022	3322	2084	3987	6578	4623	5155	3143	2485	3123	Cntn1
ENSMUSG00000038267	4906	5165	4272	4237	4610	4454	5010	4011	4660	Slc22a23
ENSMUSG00000020250	7143	6311	6258	3143	3305	3264	4409	4974	4123	Txnrd1
ENSMUSG00000022533	6069	3446	6639	3466	3910	4098	2990	2695	3250	Atp13a3
ENSMUSG00000038615	3701	3801	4115	6370	5335	5491	5747	5459	5700	Nfe2l1
ENSMUSG00000027663	5430	5207	5726	3677	3449	3802	4677	3385	4789	Zmat3
ENSMUSG00000020152	5564	3797	6007	3453	3660	3743	3598	3988	3583	Actr2
ENSMUSG00000049517	7746	8656	6447	2631	2135	2121	1358	2400	1844	Rps23
ENSMUSG00000020456	3700	3504	3348	4431	4441	4564	5026	3765	4500	Ogdh
ENSMUSG00000053398	8029	7926	7004	1605	1389	1509	4188	5357	3518	Phgdh
ENSMUSG00000020029	4621	4215	5162	4260	3698	3384	8781	10428	9357	Nudt4
ENSMUSG00000037815	3029	2848	2553	5081	4893	4620	8738	9182	9083	Ctnna1
ENSMUSG00000049100	4103	3009	3266	4821	4390	4439	4453	3755	4666	Pcdh10
ENSMUSG00000020091	6260	5667	4866	4234	3694	4045	4116	3187	4104	Eif4ebp2
ENSMUSG00000042700	2711	2241	2048	5642	6682	6743	5617	3916	6904	Sipa1l1
ENSMUSG00000051391	6198	6807	5883	3278	3310	3485	5991	6099	5186	Ywhag
ENSMUSG00000063316	7381	7915	6341	2995	2750	2883	1876	3231	2392	Rpl27
ENSMUSG00000017485	5204	3016	6388	3609	3761	3713	2629	2635	2647	Top2b
ENSMUSG00000019432	6713	6691	6127	2912	3024	3204	2735	3116	2868	Ddx39b
ENSMUSG00000027642	5522	5228	4691	3645	3892	4205	2533	2762	2716	Rpn2
ENSMUSG00000015709	6209	5475	5021	3073	3684	3338	4307	3958	4789	Arnt2
ENSMUSG00000015291	3443	3958	4429	4347	4282	4124	4842	5944	5005	Gdi1
ENSMUSG00000018501	4679	3406	5922	4522	3776	3599	3601	1958	3642	Ncor1
ENSMUSG00000014956	4044	3186	4093	4034	4137	4072	7867	9221	7195	Ppp1cb
ENSMUSG00000027288	5267	3995	5409	4578	4516	4343	4226	3095	4603	Zfp106
ENSMUSG00000028234	7346	8289	6394	1653	1838	1754	1536	2803	1802	Rps20
ENSMUSG00000022390	5001	4864	4713	4699	3987	4029	3972	3006	4283	Zc3h7b
ENSMUSG00000025871	3895	4322	3979	4486	4288	4351	4684	5426	4915	4833439L19Rik
ENSMUSG00000014355	6196	5238	5384	2765	3103	3257	3187	2290	3372	Anapc1
ENSMUSG00000022564	1918	2382	2127	8679	6731	6430	5189	6229	6405	Grina
ENSMUSG00000017291	4706	3103	5697	4681	5074	4180	4207	3366	4969	Taok1
ENSMUSG00000051359	8188	7860	6653	2074	2379	2603	316	589	606	Ncald
ENSMUSG00000001017	4780	4572	4312	4169	3804	3971	3786	4145	3924	Chtop
ENSMUSG00000022799	1922	1944	2157	4153	6594	6911	3751	2501	3630	Arhgap31
ENSMUSG00000029632	3229	3916	3094	5113	5094	4773	3682	6466	4738	Ndufa4
ENSMUSG00000054766	8884	6706	7466	2199	2213	2285	2015	2384	2149	Set
ENSMUSG00000058690	5009	3713	5115	4335	5380	5844	3085	2677	3305	Ccser2
ENSMUSG00000038366	5405	6718	5836	3197	3183	3283	2542	2274	2657	Lasp1
ENSMUSG00000028161	5232	3750	5763	4225	4098	3768	4265	4452	4057	Ppp3ca
ENSMUSG00000038502	5283	6258	5254	3977	3403	3328	3474	4231	3658	Ptov1
ENSMUSG00000020538	3589	4476	2805	4412	5929	4357	6704	8127	6529	Srebf1
ENSMUSG00000045482	4287	4026	4717	4392	3734	3600	4518	2270	4280	Trrap
ENSMUSG00000050965	1277	1020	1289	9208	8910	8490	6592	5533	8413	Prkca
ENSMUSG00000040896	4770	4014	5893	4237	5197	4593	4915	4263	5721	Kcnd3
ENSMUSG00000033400	1180	1026	1291	7997	7880	7596	7129	5604	7500	Agl
ENSMUSG00000029763	4315	4083	4581	3246	3559	4122	4661	3971	5600	Exoc4
ENSMUSG00000058135	935	1159	972	8795	8927	9165	7052	9533	10043	Gstm1
ENSMUSG00000030317	592	647	458	8912	7970	8309	1635	2273	1436	Timp4
ENSMUSG00000078578	6075	5227	6043	3250	3571	3427	3472	4366	3422	Ube2d3
ENSMUSG00000005506	6334	5286	6211	3131	3309	3204	3492	2663	3477	Celf1
ENSMUSG00000004897	6421	6179	5314	3210	3033	3189	2866	3561	3027	Hdgf
ENSMUSG00000038886	3067	2853	3043	6299	5599	5638	4900	3420	5165	Man2a2
ENSMUSG00000032047	4528	3974	3603	4139	4110	4075	3519	4254	3826	Acat1
ENSMUSG00000031065	4090	4457	3814	4876	4091	4271	3428	3420	3508	Cdk16
ENSMUSG00000020741	4236	4804	4235	5428	4803	4827	5331	4399	5394	Cluh
ENSMUSG00000022234	7534	8443	7506	2120	2396	2577	2065	2964	2270	Cct5
ENSMUSG00000030447	4086	3682	3838	5076	5423	5497	2875	3184	3394	Cyfip1
ENSMUSG00000004040	2563	2654	2678	3464	4255	3994	5096	4529	5372	Stat3
ENSMUSG00000035569	4971	4137	5632	3802	3605	3269	3327	2203	3039	Ankrd11
ENSMUSG00000041556	94	118	109	6122	4360	3949	20936	27972	19854	Fbxo2
ENSMUSG00000038900	8465	9267	7011	1735	1759	1749	1342	2120	1411	Rpl12
ENSMUSG00000027692	3856	3273	4765	5711	5266	3917	2966	2160	2451	Tnik
ENSMUSG00000005198	6652	5494	4659	3240	3071	2757	2687	1480	2455	Polr2a
ENSMUSG00000039542	3590	3258	3709	3901	3605	4043	4380	3090	4234	Ncam1
ENSMUSG00000057113	9118	6237	9973	1813	2408	2183	2004	3050	2160	Npm1
ENSMUSG00000028788	5004	3517	4592	3722	3917	4204	4287	4480	4020	Ptp4a2
ENSMUSG00000037894	8729	7470	5502	1996	1876	1737	1188	2064	1489	H2az1
ENSMUSG00000034342	4497	3920	4755	3434	3889	3749	3379	2075	3126	Cbl
ENSMUSG00000022474	1763	2294	1815	7306	6787	5813	2843	4500	3714	Pmm1
ENSMUSG00000031555	3428	2413	3827	4511	4606	4544	3628	3587	3806	Adam9
ENSMUSG00000039477	3187	3049	2760	6311	4327	4195	5875	3441	6313	Tnrc18
ENSMUSG00000047085	5544	5215	4975	3281	2571	2896	1954	1753	2125	Lrrc4b
ENSMUSG00000015733	3497	3033	3713	4332	4945	4425	5178	6941	5468	Capza2
ENSMUSG00000058756	1818	1974	1685	6165	4316	4069	9715	9651	9272	Thra
ENSMUSG00000057841	7721	8155	5800	2015	1945	1870	1315	2119	1496	Rpl32
ENSMUSG00000021277	2703	2310	2485	5624	7286	7346	3135	2536	3691	Traf3
ENSMUSG00000027189	4873	4291	5902	3754	4017	3935	3899	2822	3899	Trim44
ENSMUSG00000029570	4503	5745	3589	3230	3398	3805	1766	1986	1625	Lfng
ENSMUSG00000068039	7604	6527	6834	2271	2703	2668	2155	3020	2319	Tcp1
ENSMUSG00000029247	5408	4526	3987	3655	3880	3903	3768	4358	3972	Paics
ENSMUSG00000034377	3633	2813	3648	3903	5366	5483	5643	3892	5865	Tulp4
ENSMUSG00000020821	3327	3540	2961	6799	5822	5536	5468	5375	5815	Kif1c
ENSMUSG00000028759	4783	4020	3974	4374	4175	3994	3990	4054	4150	Hp1bp3
ENSMUSG00000035530	6106	6193	5540	3634	3812	3842	3697	5820	4199	Eif1
ENSMUSG00000024853	5650	5557	5098	3158	2799	2968	3183	3376	3276	Sf3b2
ENSMUSG00000022565	594	734	593	7456	7703	6154	10179	6810	10589	Plec
ENSMUSG00000032393	2397	1996	2585	6320	5828	5656	5491	3864	6036	Dpp8
ENSMUSG00000022043	5250	5557	4739	3867	3430	3432	4051	3912	4178	Trim35
ENSMUSG00000021156	2643	2039	2900	4842	5465	4865	5934	5179	6293	Zmynd11
ENSMUSG00000022462	7264	6872	7609	3599	3592	2719	3328	3285	3022	Slc38a2
ENSMUSG00000036275	3960	4116	3629	4660	4672	4709	4449	4837	4549	9530068E07Rik
ENSMUSG00000002265	3916	3456	4696	3088	3065	2349	2675	1919	3006	Peg3
ENSMUSG00000056999	3747	3075	4089	4704	5545	5460	3442	3381	3921	Ide
ENSMUSG00000041642	5765	5627	6338	1528	1470	1683	2532	1672	3091	Kif21b
ENSMUSG00000027333	950	1094	961	10472	7479	6767	3805	5141	4483	Smox
ENSMUSG00000031708	4914	5504	5242	3533	3267	3292	3245	4330	3403	Tecr
ENSMUSG00000032340	2517	2350	2214	5411	5268	5234	5996	4167	5496	Neo1
ENSMUSG00000068823	6046	3641	5936	3124	3257	3012	3145	3522	3194	Csde1
ENSMUSG00000026478	5924	7244	5847	3550	3325	3364	2261	1571	2311	Lamc1
ENSMUSG00000025794	7721	7954	6413	2123	1972	2082	1539	2444	1747	Rpl14
ENSMUSG00000001687	3054	3108	3186	4311	4709	4750	5695	6778	6127	Ubl3
ENSMUSG00000064339	4799	2821	6097	4285	5044	4453	4161	5156	4064	mt-Rnr2
ENSMUSG00000039347	3919	4913	4053	3534	3584	4032	3227	3835	3244	Atp6v0e2
ENSMUSG00000028760	3773	3130	4708	4781	3898	3965	2223	1478	2104	Eif4g3
ENSMUSG00000033629	2848	2763	3002	4645	4753	5013	5342	6328	5411	Hacd3
ENSMUSG00000073702	6412	5883	5439	2388	2364	2491	1892	3136	2295	Rpl31
ENSMUSG00000001794	4017	4523	3729	4009	3843	4018	6082	8007	5146	Capns1
ENSMUSG00000035770	4053	3413	4590	5037	4687	4438	4000	4254	4290	Dync1li2
ENSMUSG00000041459	5870	4234	6293	2410	2831	2796	2497	2775	2674	Tardbp
ENSMUSG00000028211	4768	3094	5121	3508	3845	3069	5016	4150	4465	Trp53inp1
ENSMUSG00000021466	3038	2824	2738	3751	4793	4580	2054	1659	2443	Ptch1
ENSMUSG00000008683	6544	7414	6232	2018	2279	2328	1866	2825	2173	Rps15a
ENSMUSG00000020297	1547	1468	1285	4161	3932	3802	8332	9023	7500	Nsg2
ENSMUSG00000016534	2570	1706	2384	4790	4977	4956	8135	9697	8539	Lamp2
ENSMUSG00000024590	10039	7391	5570	785	896	1000	315	299	304	Lmnb1
ENSMUSG00000024063	6027	7264	6561	2621	2884	3088	639	1042	717	Lbh
ENSMUSG00000037712	2722	2634	3143	5443	4666	4370	5448	5387	5567	Fermt2
ENSMUSG00000057406	7151	4256	5541	2256	2617	2668	1725	1323	1949	Nsd2
ENSMUSG00000021782	2230	2228	2303	6959	5804	5323	3729	2475	4556	Dlg5
ENSMUSG00000030978	8584	5971	4347	1451	2276	2424	1229	1529	1366	Rrm1
ENSMUSG00000031672	4869	5200	4110	3877	3479	3404	4014	4022	3596	Got2
ENSMUSG00000027007	1889	1769	1932	7146	5359	5251	5316	5358	6561	Itprid2
ENSMUSG00000039533	269	281	271	6198	6100	6011	9879	9825	9795	Mmd2
ENSMUSG00000028618	3205	3415	2985	4551	4975	5149	4663	6846	5098	Tmem59
ENSMUSG00000060938	6810	7468	5810	2331	2555	2610	1888	3172	2117	Rpl26
ENSMUSG00000036053	2844	2369	3130	4497	5045	5165	2590	2231	2855	Fmnl2
ENSMUSG00000026425	7097	6073	6949	2123	1920	2107	1444	1084	1567	Srgap2
ENSMUSG00000058076	3317	3816	2956	4382	4174	4386	5228	7276	5301	Sdhc
ENSMUSG00000036564	1338	1549	1613	6841	6192	5806	7370	8249	7362	Ndrg4
ENSMUSG00000054008	4333	4184	3571	4215	4385	4237	6047	4610	6244	Ndst1
ENSMUSG00000032437	4153	3740	4245	3519	3476	3872	2735	2629	2803	Stt3b
ENSMUSG00000020149	4315	3787	4941	3524	3734	3822	3738	4416	3781	Rab1a
ENSMUSG00000030435	6120	6158	5305	2718	2434	2508	2583	2576	2593	U2af2
ENSMUSG00000030084	4359	4464	4444	4608	4977	5307	2829	1918	3282	Plxna1
ENSMUSG00000028127	2922	2617	3358	4383	4303	4520	3697	4019	3910	Abcd3
ENSMUSG00000005103	3681	3846	3741	3795	3572	3903	6234	7066	5694	Wdr1
ENSMUSG00000015869	1042	907	886	8030	8736	8722	2196	2743	2599	Prpsap1
ENSMUSG00000021978	5442	5666	4681	4360	3463	3698	2805	2227	3246	Extl3
ENSMUSG00000059119	4640	4524	4315	3319	3406	3405	3250	3897	3406	Nap1l4
ENSMUSG00000027195	5284	5211	5313	3232	3763	3880	1746	2405	1929	Hsd17b12
ENSMUSG00000021756	1531	1532	1720	5008	4772	4538	14429	9775	12037	Il6st
ENSMUSG00000017119	2650	2374	2785	4919	4081	4473	4098	3275	4490	Nbr1
ENSMUSG00000020122	8653	7384	8423	1331	976	1005	1280	900	1334	Egfr
ENSMUSG00000022812	4763	3546	4792	3748	3925	3931	3122	2607	3623	Gsk3b
ENSMUSG00000031827	5054	5815	4538	3589	3213	2985	7706	8168	5745	Cotl1
ENSMUSG00000093460	1587	1896	1962	6215	8119	7032	3937	3577	4993	Six3os1
ENSMUSG00000043940	5007	4193	4739	3558	3511	3624	3280	1872	3520	Wdfy3
ENSMUSG00000079215	4582	3764	4247	3999	3749	3764	3720	3409	3938	Zfp664
ENSMUSG00000056076	7394	7623	6226	2668	2580	2626	2440	2869	2486	Eif3b
ENSMUSG00000031865	3660	4105	3691	4680	3600	3743	3895	3221	3768	Dctn1
ENSMUSG00000021877	4993	5397	4772	2947	3023	3284	3477	3981	3300	Arf4
ENSMUSG00000005469	4840	5121	4131	3328	2921	3151	2925	2866	2901	Prkaca
ENSMUSG00000030002	4678	4126	4547	4140	3893	3653	3412	2472	3638	Dusp11
ENSMUSG00000052459	4158	3130	3847	3808	4442	4421	4953	5220	5459	Atp6v1a
ENSMUSG00000000632	3831	4189	3403	2007	1925	2106	2994	2184	3156	Sez6
ENSMUSG00000034730	2608	2933	2633	3754	4406	4764	4235	3331	4507	Adgrb1
ENSMUSG00000039298	3939	2632	3623	3983	3732	4216	5993	3897	6200	Cdk5rap2
ENSMUSG00000061080	1518	1296	1655	8056	6885	6649	2316	1933	2657	Lsamp
ENSMUSG00000040725	5401	4703	4170	3068	2671	2637	2422	1859	2303	Hnrnpul1
ENSMUSG00000028249	3887	3419	3763	4311	4260	4482	4659	6124	4921	Sdcbp
ENSMUSG00000001729	6332	6422	5577	2894	2704	2550	2093	2224	2176	Akt1
ENSMUSG00000025666	1360	1104	1526	4940	5238	4462	16066	18634	14976	Tmem47
ENSMUSG00000019173	3526	4197	3437	4062	3909	4042	3686	4235	3902	Rab5c
ENSMUSG00000020097	2978	3109	2967	4795	4908	4957	5187	4882	5451	Sgpl1
ENSMUSG00000062270	4678	4642	4749	3163	3273	3045	3177	4631	3537	Morf4l1
ENSMUSG00000041720	3103	3011	3122	5016	4587	4616	4426	2657	4381	Pi4ka
ENSMUSG00000026878	4276	3713	4454	3373	3604	3797	3861	3829	3944	Rab14
ENSMUSG00000049288	2415	2314	1972	4296	6759	6875	1685	2126	2437	Lix1l
ENSMUSG00000052337	3885	3579	3605	3733	3937	4107	3577	4384	3954	Immt
ENSMUSG00000036112	5470	4211	5689	3049	3176	3241	2765	3629	2715	Metap2
ENSMUSG00000020900	6433	4622	5976	2311	2028	2205	5735	4070	5567	Myh10
ENSMUSG00000074748	4082	3854	4029	3675	3562	4030	4300	4123	4192	Atxn7l3b
ENSMUSG00000007989	3894	2577	4030	2968	3185	3055	7756	5100	7793	Fzd3
ENSMUSG00000039202	4467	3624	4052	2862	3780	4160	1701	1271	1809	Abhd2
ENSMUSG00000000247	2713	2623	2210	5863	5667	5454	2189	2542	2448	Lhx2
ENSMUSG00000026442	903	993	981	10623	9354	8212	4048	2529	4784	Nfasc
ENSMUSG00000027367	3594	3417	3107	4142	3712	3848	3828	4267	4123	Stard7
ENSMUSG00000001910	4913	5023	4172	3861	3865	3684	2758	2461	2733	Nacc1
ENSMUSG00000001995	3281	2833	3737	3929	4673	5437	1134	1108	1421	Sipa1l2
ENSMUSG00000024978	2144	2199	1845	5907	4672	4153	10087	9479	11462	Gpam
ENSMUSG00000028136	3459	3382	3870	4057	4161	4373	4239	3722	4438	Snx27
ENSMUSG00000024565	7746	6303	5364	1873	2209	1795	1690	1310	1744	Sall3
ENSMUSG00000026341	6285	5859	6113	2391	2359	2462	2606	3048	2587	Actr3
ENSMUSG00000023092	4683	4441	4664	4045	4779	4689	6225	8568	7255	Fhl1
ENSMUSG00000025968	2481	2116	2419	4682	4964	4843	4758	6257	5037	Ndufs1
ENSMUSG00000002107	4837	3895	5762	3015	3143	3102	2768	2087	2968	Celf2
ENSMUSG00000063511	3761	3686	4289	4250	3336	3038	3317	3062	3403	Snrnp70
ENSMUSG00000024533	1794	1609	2137	6432	6755	6595	4678	4722	5328	Spire1
ENSMUSG00000031839	2897	2883	2585	4174	4085	4132	3971	5739	4349	Hsbp1
ENSMUSG00000030432	6818	6948	6039	2087	1973	1904	1514	2189	1634	Rpl28
ENSMUSG00000043962	5931	4604	5003	3773	3397	3007	2897	2371	2955	Thrap3
ENSMUSG00000039361	4361	2893	4568	2678	3590	3649	3029	3600	3428	Picalm
ENSMUSG00000048022	1389	965	1210	9665	7465	6938	1360	1306	1756	Tmem229a
ENSMUSG00000019804	3735	4223	3629	3545	3453	3540	3038	4122	3146	Snx3
ENSMUSG00000061315	6045	6806	6031	2340	2510	2396	2059	2818	2226	Naca
ENSMUSG00000022010	3921	4152	3919	3754	3590	3526	4396	5267	5173	Tsc22d1
ENSMUSG00000030852	4413	4284	4560	1824	2187	2694	830	812	731	Tacc2
ENSMUSG00000003411	7146	9239	7001	451	387	397	171	318	374	Rab3b
ENSMUSG00000022200	3892	3380	3801	2291	2939	3239	2481	2777	2585	Golph3
ENSMUSG00000001441	3922	3250	4064	3602	3219	3217	4024	3754	4520	Npepps
ENSMUSG00000026615	5401	3317	6449	2951	3193	3363	2572	2464	2743	Eprs
ENSMUSG00000000346	3325	3572	3066	4044	3962	4036	5755	6798	5721	Dazap2
ENSMUSG00000041571	3420	4051	3301	4001	3073	2965	3106	5220	3454	Selenow
ENSMUSG00000056851	5671	5509	4560	3182	3051	2915	2819	3043	3208	Pcbp2
ENSMUSG00000054863	2339	2536	2150	4517	4752	4959	6649	7130	6641	Tafa5
ENSMUSG00000015305	1456	1193	1304	8211	7106	5910	6271	5785	7545	Sash1
ENSMUSG00000063015	4044	3968	3691	4082	3653	3842	3908	4562	4138	Ccni
ENSMUSG00000038456	5571	5601	5684	2345	2935	3304	1566	1519	1647	Dennd2a
ENSMUSG00000027199	3053	2737	3002	3026	3899	4273	382	947	782	Gatm
ENSMUSG00000028944	742	777	787	3685	3339	3283	17501	17444	17015	Prkag2
ENSMUSG00000004558	71	164	119	8019	4889	4348	13376	16109	12524	Ndrg2
ENSMUSG00000028410	4517	3129	5409	2579	2691	2709	3401	4682	3671	Dnaja1
ENSMUSG00000026667	3486	2774	3844	3745	4239	4283	4075	3550	4243	Uhmk1
ENSMUSG00000023150	6676	5051	6070	2166	2321	2477	4959	5042	4022	Ivns1abp
ENSMUSG00000025351	4346	5157	4059	3112	2473	2379	7352	10808	7612	Cd63
ENSMUSG00000019132	4045	3273	3542	4275	4110	3975	3569	4162	3676	BC005537
ENSMUSG00000025967	6420	6236	5182	2007	2228	2237	1626	2719	1772	Eef1b2
ENSMUSG00000029245	1921	1193	2089	5555	4399	4342	4200	3428	5391	Epha5
ENSMUSG00000039100	4045	3143	3814	3631	3725	3529	3970	3297	3782	Marchf6
ENSMUSG00000004031	1550	1525	1233	4720	4594	5237	2055	1993	2764	Brinp2
ENSMUSG00000029472	5385	4632	4103	2615	2596	2728	2621	2792	2698	Anapc5
ENSMUSG00000024083	3724	2555	4474	3197	3541	3755	4217	4187	4059	Pja2
ENSMUSG00000031776	4548	4835	4266	2658	2833	2775	3394	4260	3386	Arl2bp
ENSMUSG00000030884	3340	3289	2959	4015	4301	4275	4213	5369	4485	Uqcrc2
ENSMUSG00000028514	4375	2823	4684	3067	2715	2626	2029	1488	2659	Usp24
ENSMUSG00000028756	974	1336	1046	8779	6769	6674	8595	10161	9675	Pink1
ENSMUSG00000032096	4479	3628	4812	2797	3160	3132	3007	2926	3007	Arcn1
ENSMUSG00000025582	1633	1966	2266	4901	5352	9156	465	200	314	Nptx1
ENSMUSG00000031010	4134	2454	4780	3698	3972	3684	4967	3017	5093	Usp9x
ENSMUSG00000003660	5134	4664	4555	2939	2886	3001	2892	2210	2998	Snrnp200
ENSMUSG00000096188	3650	2949	2754	3424	3863	4213	4368	3131	3846	Cmtm4
ENSMUSG00000017466	3183	3363	2624	1149	1622	1550	16181	13295	14616	Timp2
ENSMUSG00000002052	3268	3141	3396	4787	4462	4191	3612	2833	3796	Supt6
ENSMUSG00000061787	5755	6224	4878	2454	2178	2147	1608	2579	1871	Rps17
ENSMUSG00000018677	3764	4112	3373	3494	3231	3372	3611	4571	3640	Slc25a39
ENSMUSG00000059208	5323	3600	5689	2720	2480	2483	2476	2879	2756	Hnrnpm
ENSMUSG00000052681	3051	2749	3253	4054	4608	4910	2423	3354	2562	Rap1b
ENSMUSG00000020114	5190	4626	4269	2633	3164	3210	3022	2885	3144	Cand1
ENSMUSG00000021288	3654	3812	3922	4134	3272	2920	3815	4097	4153	Klc1
ENSMUSG00000033335	2650	2705	2658	4463	3573	3856	3645	3471	3607	Dnm2
ENSMUSG00000040722	2782	3215	2738	4015	3944	3942	3126	3324	3221	Scamp5
ENSMUSG00000020536	3940	4288	3559	3263	2794	2996	3772	2952	3538	Llgl1
ENSMUSG00000068735	13342	12426	13057	135	121	92	1109	696	626	Trp53i11
ENSMUSG00000054843	2825	2447	2619	4779	5145	5418	1462	1462	1858	Atrnl1
ENSMUSG00000020362	5776	3590	5453	1804	2092	2066	2013	1963	1847	Cnot6
ENSMUSG00000024892	1720	1658	1320	2935	2217	2389	14151	9368	9994	Pcx
ENSMUSG00000036902	5777	3136	5105	1517	2194	2023	2415	1857	1851	Neto2
ENSMUSG00000031696	4610	3506	4391	2780	3222	3185	3030	3935	3366	Vps35
ENSMUSG00000004099	8751	6726	5696	1065	1524	1525	1006	806	1025	Dnmt1
ENSMUSG00000028465	3880	4090	3960	3698	3011	3170	3004	2313	3203	Tln1
ENSMUSG00000005442	3650	3690	3839	3408	2873	2924	3348	2159	3516	Cic
ENSMUSG00000019961	7891	4762	4796	1135	1556	1613	907	852	874	Tmpo
ENSMUSG00000092035	5179	4663	4612	2638	2334	1960	3761	2721	3885	Peg10
ENSMUSG00000015837	2780	3072	2633	5300	4535	4206	6864	9655	7827	Sqstm1
ENSMUSG00000021660	6448	6607	5712	1958	2138	2100	1687	2767	1920	Btf3
ENSMUSG00000022201	3094	2401	4059	3538	3641	3929	4275	4111	4028	Zfr
ENSMUSG00000039735	2345	1466	2524	6449	7930	6992	3758	4200	4443	Fnbp1l
ENSMUSG00000000149	4005	4355	3792	3294	3114	3284	2939	3118	3131	Gna12
ENSMUSG00000027406	2929	3096	2688	4399	4114	3791	4558	5670	4685	Idh3b
ENSMUSG00000000826	4025	3771	3476	3932	3967	3932	3803	3478	3889	Dnajc5
ENSMUSG00000025508	5904	6527	5497	2012	1854	1910	1440	2223	1584	Rplp2
ENSMUSG00000018398	4716	4527	4428	2880	2838	2973	2700	2519	3274	Septin8
ENSMUSG00000033184	3778	3114	3703	3460	3866	3857	2989	3270	3054	Tmed7
ENSMUSG00000055204	3919	2343	3846	3526	3635	3686	3727	1826	3889	Ankrd17
ENSMUSG00000018583	6328	5874	5800	2091	2439	2365	1979	1853	2155	G3bp1
ENSMUSG00000025369	4025	3729	3549	4244	3404	3316	3446	2855	3795	Smarcc2
ENSMUSG00000038965	3429	3406	3215	3357	3887	4378	4276	5082	4166	Ube2l3
ENSMUSG00000048616	10	14	13	3985	7627	7476	5244	6810	5641	Nog
ENSMUSG00000028936	5164	4963	4424	2429	2646	2772	2338	3048	2590	Rpl22
ENSMUSG00000062203	4998	3848	4679	2562	2962	3120	2666	2312	2897	Gspt1
ENSMUSG00000009073	2741	3002	2747	4333	3905	4106	3218	2534	3253	Nf2
ENSMUSG00000031229	3239	2267	5280	3792	4579	2997	3355	2348	3461	Atrx
ENSMUSG00000017707	2448	2174	2499	4713	5299	5069	4425	5506	4749	Serinc3
ENSMUSG00000013921	3023	3497	3133	4057	2945	3237	4107	3473	4087	Clip3
ENSMUSG00000052298	7520	7377	5859	1933	1634	1699	2619	2586	2476	Cdc42se2
ENSMUSG00000031540	4067	2790	3993	2834	2833	3030	3145	1372	3199	Kat6a
ENSMUSG00000030062	3947	4557	3940	3351	3680	3652	2823	3597	3112	Rpn1
ENSMUSG00000028426	5355	5731	4971	2742	2605	2771	2776	2820	2788	Rad23b
ENSMUSG00000075415	2561	2982	3521	6116	5145	5195	4931	4666	5589	Fnbp1
ENSMUSG00000038324	3439	4016	3635	3815	3307	3346	3286	3616	3572	Trpc4ap
ENSMUSG00000046722	4950	5012	4164	2184	2199	2015	2502	2884	2387	Cdc42se1
ENSMUSG00000014313	2651	2775	2383	4274	3950	3970	4019	6846	4878	Cox6c
ENSMUSG00000031029	5173	6110	4328	2500	2292	2288	2002	2711	2072	Eif3f
ENSMUSG00000027940	6310	5836	5374	1925	1946	2180	2535	2766	2346	Tpm3
ENSMUSG00000031529	3076	2238	3298	4064	4443	4424	4512	2891	4264	Tnks
ENSMUSG00000029823	3683	2716	4731	3408	4125	3341	3415	3463	3464	Luc7l2
ENSMUSG00000007880	4962	4531	4479	2860	2813	2842	2963	1591	2940	Arid1a
ENSMUSG00000040681	5706	5933	5311	1857	1614	1845	2077	2611	1997	Hmgn1
ENSMUSG00000024908	4368	3375	4277	2985	2794	2906	2482	2162	2690	Ppp6r3
ENSMUSG00000037266	1492	1061	1683	6436	4861	3933	5999	7172	6267	Rsrp1
ENSMUSG00000025321	4538	2870	4108	2467	2232	2031	5324	4470	4674	Itgb8
ENSMUSG00000032199	5014	5016	4641	3345	3268	3195	3048	3844	3170	Polr2m
ENSMUSG00000028790	5517	5401	5265	1932	2037	2103	1830	1885	1751	Khdrbs1
ENSMUSG00000021111	4570	3160	4790	2898	3018	3119	2712	2250	2932	Papola
ENSMUSG00000059447	1982	2083	1835	5046	5131	5276	4906	5817	4838	Hadhb
ENSMUSG00000040209	3316	2173	3400	3352	4451	4359	3672	2183	4091	Zfp704
ENSMUSG00000021709	3327	2109	4149	3184	3673	3211	6580	6239	6029	Erbin
ENSMUSG00000061032	4378	4328	4018	3431	2889	2760	2620	2801	2706	Rrp1
ENSMUSG00000028796	4674	5233	4326	2674	2563	2921	1472	1609	1434	Phc2
ENSMUSG00000022263	4507	4238	5164	2572	2832	2642	2714	1598	2400	Trio
ENSMUSG00000040724	2040	1291	2961	5338	4347	3783	4971	2678	4791	Kcna2
ENSMUSG00000036751	3108	3726	2766	3558	3288	3378	3057	5631	3659	Cox6b1
ENSMUSG00000044783	6123	4092	3342	1806	2084	2353	1439	1162	1865	Hjurp
ENSMUSG00000031808	2575	2771	3007	5963	2740	2643	3148	2743	3189	Slc27a1
ENSMUSG00000002808	2486	2755	2854	4204	3725	3861	5462	7035	5720	Epdr1
ENSMUSG00000034120	6556	6703	4751	2158	2321	2260	1939	2522	1874	Srsf2
ENSMUSG00000033392	2692	2022	3011	4022	3243	3478	3527	2746	3647	Clasp2
ENSMUSG00000026576	1597	1859	2360	3177	3346	3451	9363	9985	7617	Atp1b1
ENSMUSG00000013076	2768	1992	3437	2576	2649	4095	3093	1794	2413	Amotl1
ENSMUSG00000000568	5887	4424	4801	2013	2464	2252	2033	2297	1844	Hnrnpd
ENSMUSG00000025950	3661	3729	4324	2145	2108	1966	3000	4181	3258	Idh1
ENSMUSG00000032883	1536	1067	1681	5457	4842	3673	9056	11844	6276	Acsl3
ENSMUSG00000002524	4610	4721	4227	2430	2560	2516	2660	3480	2783	Puf60
ENSMUSG00000024870	4069	4502	3568	3441	2992	2847	2628	2842	2437	Rab1b
ENSMUSG00000038371	4864	3643	4985	2821	2910	2739	2098	1377	2386	Sbf2
ENSMUSG00000039176	3540	3684	3800	2828	2530	2906	1181	938	1320	Polg
ENSMUSG00000031532	1929	2297	2116	5111	4562	4681	5417	7101	5757	Saraf
ENSMUSG00000038143	4621	3687	4493	2150	2578	2319	3690	2257	3575	Stox2
ENSMUSG00000042079	6726	5112	5515	1670	1991	2044	1647	2234	1816	Hnrnpf
ENSMUSG00000025103	2509	2246	2628	4763	4490	4527	4893	5009	4760	Btbd1
ENSMUSG00000024073	4201	2723	4431	3124	3252	3454	2707	1527	3037	Birc6
ENSMUSG00000018042	3434	3876	3376	2207	2603	2386	6497	7761	5421	Cyb5r3
ENSMUSG00000045763	8136	8541	7759	699	691	693	1433	1407	1231	Basp1
ENSMUSG00000030516	3814	2639	4684	2603	1918	2242	3343	2120	3228	Tjp1
ENSMUSG00000004530	7631	8658	7082	1480	1603	1726	1271	1296	1479	Coro1c
ENSMUSG00000037235	2375	3268	2695	4331	3351	3119	3198	2315	3528	Mxd4
ENSMUSG00000035203	3588	4359	3737	3088	2706	2727	2602	2448	2569	Epn1
ENSMUSG00000020571	4321	4682	4753	2827	2682	3211	1773	2156	1909	Pdia6
ENSMUSG00000047888	3261	2216	3117	4241	3597	3301	3268	1538	3288	Tnrc6b
ENSMUSG00000009863	3424	3877	3173	3162	3141	2969	3614	5447	3540	Sdhb
ENSMUSG00000024294	2676	2065	3685	4153	4450	3930	2872	2398	3193	Mib1
ENSMUSG00000036550	5320	3424	4420	2469	2674	2591	2182	1432	2530	Cnot1
ENSMUSG00000017778	2906	3616	2645	3727	3109	2687	2860	4749	3199	Cox7c
ENSMUSG00000046330	4340	5866	4022	2480	2003	1939	1458	2592	1869	Rpl37a
ENSMUSG00000017843	3591	2931	3319	2822	2856	3033	2901	2836	2871	Ppp2r5c
ENSMUSG00000028849	4307	4600	3966	3291	2298	2375	3129	3167	3186	Map7d1
ENSMUSG00000023913	295	258	329	4233	4926	5740	14392	16331	15697	Pla2g7
ENSMUSG00000026676	10	31	11	4472	6371	5427	18004	18279	13337	Ccdc3
ENSMUSG00000025220	3222	2480	3545	4308	3510	3566	3956	3610	3903	Oga
ENSMUSG00000071659	3971	3213	3752	2938	2539	2592	2368	1807	2407	Hnrnpul2
ENSMUSG00000060279	3202	3071	2636	3352	3199	3573	3198	3086	3242	Ap2a1
ENSMUSG00000071415	5460	4736	4676	1962	1837	1776	1375	2162	1626	Rpl23
ENSMUSG00000006304	4545	4970	4738	2665	2709	2680	2533	3255	2728	Arpc2
ENSMUSG00000004319	2430	1884	3215	4283	4189	4148	3555	3212	3720	Clcn3
ENSMUSG00000031328	4855	4687	4632	1869	1171	1484	7200	4286	6385	Flna
ENSMUSG00000023169	5689	4495	5082	2532	1828	2055	9691	5316	8258	Slc38a1
ENSMUSG00000038252	6451	4231	3332	1256	1251	1408	749	610	682	Ncapd2
ENSMUSG00000025332	4106	3959	4279	2990	2202	2604	2264	1277	2309	Kdm5c
ENSMUSG00000047187	3530	3091	3335	3538	3643	3466	3085	4283	3462	Rab2a
ENSMUSG00000028034	4751	4011	5530	1708	1871	1960	2379	2017	2640	Fubp1
ENSMUSG00000050953	297	400	350	4909	3507	3214	11299	13735	14138	Gja1
ENSMUSG00000004902	1964	2134	1829	4578	4224	3543	4992	6816	5497	Slc25a18
ENSMUSG00000028832	6209	4657	3666	1102	1171	1228	2256	3477	2060	Stmn1
ENSMUSG00000029169	5671	4234	5072	2187	2454	2557	2114	2491	2418	Dhx15
ENSMUSG00000003847	1233	933	1904	6064	6980	5843	6033	3783	6720	Nfat5
ENSMUSG00000049295	2445	2752	2146	4650	4124	4131	2735	2713	3266	Zfp219
ENSMUSG00000019302	2994	3161	3360	3486	3141	3103	4068	3435	3798	Atp6v0a1
ENSMUSG00000028556	4531	3649	5193	1624	2178	1894	4541	3355	4352	Dock7
ENSMUSG00000020594	5346	2819	4392	2753	2930	3175	2918	2655	2885	Pum2
ENSMUSG00000027523	3170	4134	3196	3877	2967	2869	2558	2329	2826	Gnas
ENSMUSG00000036026	2766	3131	3187	3551	3433	3475	3084	2722	2908	Tmem63b
ENSMUSG00000044674	2408	2370	2438	3745	4928	5014	1687	1715	1829	Fzd1
ENSMUSG00000019428	3263	3475	2801	3677	3005	3184	3189	4357	3436	Fkbp8
ENSMUSG00000030275	2296	1493	2453	3745	3874	4341	4173	3335	4422	Etnk1
ENSMUSG00000044894	2973	3290	2648	3756	3218	2988	2998	5274	3496	Uqcrq
ENSMUSG00000001891	1175	944	1194	3546	5055	4990	5461	7794	6504	Ugp2
ENSMUSG00000022698	4345	2774	4285	2317	2976	2708	2584	3010	2595	Naa50
ENSMUSG00000046329	2326	2467	2211	3947	3325	3424	3997	2767	3654	Slc25a23
ENSMUSG00000027342	7963	5850	4648	1284	1942	1770	1110	1636	1104	Pcna
ENSMUSG00000066232	4459	2326	5195	2497	2762	3057	3457	3471	3701	Ipo7
ENSMUSG00000037736	1216	999	1211	4245	5805	5063	4356	4720	4311	Limch1
ENSMUSG00000017221	4856	5535	4670	2839	2573	2372	2164	2248	2093	Psmd3
ENSMUSG00000031563	969	841	817	4144	6472	5807	4954	4643	6007	Wwc2
ENSMUSG00000021427	4256	3583	3828	2883	2853	2811	3038	2587	2824	Ssr1
ENSMUSG00000037509	1272	1382	1110	2316	3058	2811	9550	5293	7925	Arhgef4
ENSMUSG00000003429	5727	7146	5845	1605	1608	1590	1127	1757	1529	Rps11
ENSMUSG00000031701	3576	3035	3594	2730	3337	3144	3138	4103	3199	Dnaja2
ENSMUSG00000032777	3458	3535	3793	2970	2674	2826	2864	2137	2965	Gtf3c1
ENSMUSG00000017386	6843	7076	5533	935	790	1004	471	494	466	Traf4
ENSMUSG00000032249	4116	3153	4043	2934	2537	2512	3329	4156	3771	Anp32a
ENSMUSG00000002748	5367	3201	4179	2403	2336	2448	2001	1480	2127	Baz1b
ENSMUSG00000019920	3737	2290	4170	3213	3086	3106	2453	2614	2589	Lims1
ENSMUSG00000031604	2642	2776	3348	1358	2495	2209	2042	4105	3017	Msmo1
ENSMUSG00000030223	3021	2974	3617	4040	3613	4183	717	743	858	Ptpro
ENSMUSG00000020257	4464	4494	3831	2693	2503	2694	2667	2467	2770	Wdr82
ENSMUSG00000022536	4467	4142	4012	2723	2588	2548	2279	2266	2480	Glyr1
ENSMUSG00000044576	4829	5513	4934	1973	1922	1662	1145	1225	1531	Garem2
ENSMUSG00000048376	2638	2360	3072	2123	3029	2911	1863	2257	1965	F2r
ENSMUSG00000027067	5738	4974	4481	1932	2029	2154	1895	2131	2026	Ssrp1
ENSMUSG00000020902	3531	3577	2544	1488	1680	1858	644	704	810	Ntn1
ENSMUSG00000015932	3777	3861	3426	2304	2533	2397	4092	5197	4024	Dstn
ENSMUSG00000022403	4342	4121	4360	2884	2520	2595	2582	3031	2901	St13
ENSMUSG00000006818	2564	2911	2747	3696	3426	3438	3352	3599	3376	Sod2
ENSMUSG00000036707	3674	2484	3723	3238	3137	3107	3589	3434	3814	Cab39
ENSMUSG00000039515	3852	4113	3354	2941	2776	2865	2480	2803	2406	Ptpa
ENSMUSG00000047261	9145	7644	8714	227	305	377	852	1231	940	Gap43
ENSMUSG00000019873	4244	3206	3866	2683	2846	2640	1533	1358	1582	Reep3
ENSMUSG00000004936	1982	2554	2146	3662	4393	4321	5419	6563	5653	Map2k1
ENSMUSG00000028184	4318	3891	4968	1765	2667	2863	744	555	940	Adgrl2
ENSMUSG00000038991	2799	3226	2586	2902	3340	3022	5995	6515	5505	Txndc5
ENSMUSG00000034341	2686	3037	2472	4239	3740	3513	4021	4469	4316	Wbp2
ENSMUSG00000038612	4154	3923	3630	2872	3245	3140	4158	5118	4522	Mcl1
ENSMUSG00000029772	2161	2062	2609	4539	4444	4266	4093	3694	4262	Ahcyl2
ENSMUSG00000044308	3540	2327	4040	3424	3505	3202	3168	2449	3127	Ubr3
ENSMUSG00000078429	3965	4106	3452	4152	3327	2778	3970	3837	3826	Ctdsp2
ENSMUSG00000062762	3714	3754	3281	2734	2609	2678	3477	3987	3736	Ei24
ENSMUSG00000062683	4008	4188	3469	2559	2429	2598	2327	3184	2317	Atp5g2
ENSMUSG00000024735	5156	5436	4483	2256	2156	2302	2082	2201	2177	Prpf19
ENSMUSG00000079523	7330	10372	6897	201	128	141	540	629	456	Tmsb10
ENSMUSG00000028032	3100	2983	2374	2838	2809	3047	2119	2391	2231	Papss1
ENSMUSG00000013787	3528	3621	3548	3161	2570	2812	2392	2207	2533	Ehmt2
ENSMUSG00000020661	3568	2668	3841	3332	2725	2817	2414	1603	2192	Dnmt3a
ENSMUSG00000035877	1763	1496	1843	6706	4193	3551	3299	2764	2713	Zhx3
ENSMUSG00000063694	3505	3650	3340	2875	2783	2370	2634	3991	2955	Cycs
ENSMUSG00000020664	2711	1861	2746	3739	3789	3629	3991	5423	4086	Dld
ENSMUSG00000026697	0	0	3	81	38	30	50646	24486	22632	Myoc
ENSMUSG00000058546	5510	5287	4934	1390	1565	1556	898	1505	1179	Rpl23a
ENSMUSG00000019087	2631	2770	2528	3824	4136	4295	3356	4239	3744	Atp6ap1
ENSMUSG00000050148	5148	4253	3847	2334	2286	2344	2260	2197	2370	Ubqln2
ENSMUSG00000030451	2753	2151	3050	3571	3615	3590	3637	2296	3978	Herc2
ENSMUSG00000020088	3701	3842	3415	3033	3425	3281	2628	3158	2710	Sar1a
ENSMUSG00000042406	4594	5439	5417	3848	3968	3274	1909	3126	2041	Atf4
ENSMUSG00000007411	3374	3368	3889	2667	2439	2441	2704	2912	2647	Mark3
ENSMUSG00000036698	4521	3683	4086	2648	2474	2420	2091	1068	2345	Ago2
ENSMUSG00000030224	4421	3712	4035	2269	2813	2619	2930	3828	2968	Strap
ENSMUSG00000063882	2396	3026	2422	3201	2926	2848	3030	5312	3403	Uqcrh
ENSMUSG00000075706	2241	2738	2012	2933	3019	2951	6652	11308	6348	Gpx4
ENSMUSG00000020869	6566	6703	5500	1701	1837	1913	1876	1749	1827	Lrrc59
ENSMUSG00000037972	3000	2724	2286	2957	2871	2568	2724	2745	2969	Snn
ENSMUSG00000031078	3689	4002	3719	2663	2555	2387	3977	4167	3803	Cttn
ENSMUSG00000032637	4014	3937	4554	2652	2198	2139	1981	1332	2206	Atxn2l
ENSMUSG00000039159	2101	2111	2425	4053	3082	3463	3644	3398	3664	Ube2h
ENSMUSG00000066306	3292	2784	2806	3977	3039	3137	2770	1852	2985	Numa1
ENSMUSG00000030307	3723	4728	3893	1478	1267	1505	468	453	455	Slc6a11
ENSMUSG00000054693	3198	2103	3347	2238	2974	3062	2930	2893	3543	Adam10
ENSMUSG00000020864	3031	2788	3010	3678	3835	3715	3386	3730	3847	Ankrd40
ENSMUSG00000032423	5695	3299	4850	1955	2272	2229	1842	1996	1829	Syncrip
ENSMUSG00000017776	3710	2717	3435	3304	3423	3206	3185	3732	3601	Crk
ENSMUSG00000070733	2002	1790	2112	3634	4352	4124	5161	3231	5685	Fryl
ENSMUSG00000054252	2374	2719	1894	4084	3588	3006	3330	3977	3449	Fgfr3
ENSMUSG00000040151	2948	2570	2642	2875	3621	3889	2239	2572	2479	Hs2st1
ENSMUSG00000022265	1737	1669	1713	3904	4031	3871	7773	7915	6403	Ank
ENSMUSG00000027012	3457	3177	4126	2534	2587	2549	3096	3772	3015	Dync1i2
ENSMUSG00000028484	4759	2483	4125	1974	2113	1947	2140	2286	2144	Psip1
ENSMUSG00000040385	5021	5226	4082	2051	1990	1887	2012	2444	1889	Ppp1ca
ENSMUSG00000030082	4038	4492	3596	2448	2567	2739	2450	2017	2476	Sec61a1
ENSMUSG00000027193	3897	3058	3557	2546	2968	3022	2741	2935	2833	Api5
ENSMUSG00000028656	3502	3801	3307	3313	3271	3295	4003	4037	4221	Cap1
ENSMUSG00000006676	2899	2977	3045	3866	3226	3179	3734	3388	4058	Usp19
ENSMUSG00000068740	3140	3080	2723	2579	2280	2349	3333	1723	2609	Celsr2
ENSMUSG00000006273	3738	3874	3377	2811	2717	2758	3742	5021	4108	Atp6v1b2
ENSMUSG00000029076	2676	2917	2570	3751	3648	3539	3247	3717	3438	Sdf4
ENSMUSG00000037306	160	141	141	4555	4708	4568	10585	10031	12637	Man1c1
ENSMUSG00000062006	5456	5048	4385	1652	1949	2001	1592	2477	1824	Rpl34
ENSMUSG00000050043	2293	2538	2342	3153	3558	3812	2779	3972	3120	Tmx2
ENSMUSG00000020520	2785	3071	1982	2276	4285	4822	703	1011	1336	Galnt10
ENSMUSG00000032458	3802	3485	3536	2591	2742	2602	2740	3324	2922	Copb2
ENSMUSG00000055436	2830	2369	4161	3191	3403	2505	2611	2286	2386	Srsf11
ENSMUSG00000068739	4219	4860	4722	2794	2579	2529	2002	2637	2049	Sars
ENSMUSG00000031068	4686	4962	4357	2048	2205	2166	2218	3112	2324	Glrx3
ENSMUSG00000031703	2268	2082	2135	3257	3610	3869	2931	3357	3184	Itfg1
ENSMUSG00000035150	4823	3535	4454	2360	2345	2425	2430	2300	2468	Eif2s3x
ENSMUSG00000021540	4049	3410	4128	2030	2275	2314	2382	2084	2468	Smad5
ENSMUSG00000020823	3348	3165	3096	3754	3196	3349	3432	3321	3636	Sec14l1
ENSMUSG00000048758	5053	5812	4409	1776	1549	1578	1141	1899	1791	Rpl29
ENSMUSG00000026526	2741	2524	2199	3510	3497	3717	3195	4330	3439	Fh1
ENSMUSG00000026782	4202	3049	4583	1980	2305	2386	1752	1814	1928	Abi2
ENSMUSG00000002741	3014	3098	2676	2602	2828	2830	2991	3709	3111	Ykt6
ENSMUSG00000031596	515	333	462	3939	5084	4420	12228	9492	12443	Slc7a2
ENSMUSG00000060227	1820	1168	2299	4494	5020	4553	3461	3433	3771	Golm2
ENSMUSG00000020271	3481	3500	3523	3340	3301	3358	2786	2623	3179	Fbxw11
ENSMUSG00000036529	3751	4126	3616	2635	2466	2349	2316	1819	2321	Sbf1
ENSMUSG00000038056	1931	1401	2122	4064	4109	3682	3046	1696	3250	Kmt2c
ENSMUSG00000026469	2063	1367	2259	3070	2932	2887	5184	3789	4537	Xpr1
ENSMUSG00000033105	2849	3576	4373	1012	1676	1433	1013	1135	1359	Lss
ENSMUSG00000037012	3004	3514	3417	2945	2354	2389	5070	4298	5040	Hk1
ENSMUSG00000028412	1252	1048	1048	4746	4914	4868	2694	2944	3280	Slc44a1
ENSMUSG00000022797	5431	3840	5883	2048	2254	2047	2656	2584	2183	Tfrc
ENSMUSG00000041638	3870	4046	4202	2421	2099	2181	2109	1473	2290	Gcn1
ENSMUSG00000045039	2644	2876	2887	3836	3039	3222	2787	2006	2787	Megf8
ENSMUSG00000037211	3074	2704	1810	1937	4208	4996	115	185	129	Spry1
ENSMUSG00000068220	9817	11514	7005	302	214	183	364	660	492	Lgals1
ENSMUSG00000052296	3086	3057	3024	3148	2780	2639	3169	2827	2918	Ppp6r1
ENSMUSG00000027254	2078	2042	1852	4170	2753	2314	7793	4222	6282	Map1a
ENSMUSG00000002010	2290	2384	2169	4078	3971	3739	4043	5438	4010	Idh3g
ENSMUSG00000035247	3227	1834	3412	2894	2997	3156	3255	2445	3444	Hectd1
ENSMUSG00000020929	3991	3617	3196	1691	1977	2138	5402	5564	6212	Eftud2
ENSMUSG00000070436	2990	4485	3549	3313	2418	2580	3057	2926	2901	Serpinh1
ENSMUSG00000025410	2813	3345	2885	3320	3025	2867	3137	3576	3360	Dctn2
ENSMUSG00000021748	2419	2363	2248	3152	3170	3214	3260	4314	3015	Pdhb
ENSMUSG00000022391	5100	3915	3231	1496	1593	1952	1490	1622	1444	Rangap1
ENSMUSG00000035478	4873	4594	3974	2490	2341	2229	1870	2293	1951	Mbd3
ENSMUSG00000022956	2825	2904	2331	2915	2788	2748	2822	4887	2903	Atp5o
ENSMUSG00000020649	9110	6509	4525	461	949	983	282	332	296	Rrm2
ENSMUSG00000028333	5639	4818	4692	1685	1909	2157	1511	1753	1379	Anp32b
ENSMUSG00000002028	3092	2189	2971	3643	3246	2950	2855	1133	2768	Kmt2a
ENSMUSG00000031538	3898	4422	3497	1066	1306	1449	5130	5041	5115	Plat
ENSMUSG00000017421	4183	3496	3723	2216	2521	2588	2201	2521	2429	Zfp207
ENSMUSG00000025026	2322	1720	1955	3337	2646	2616	4270	4195	4621	Add3
ENSMUSG00000030357	5380	5778	4976	2040	1568	1743	1420	1585	1601	Fkbp4
ENSMUSG00000032803	4724	3738	3861	2328	2569	2539	2479	2788	2554	Cdv3
ENSMUSG00000031012	2817	2302	2984	2853	3850	3813	1247	1215	1417	Cask
ENSMUSG00000055320	3462	3174	4189	2515	2933	2931	2978	2119	2971	Tead1
ENSMUSG00000034667	3499	3269	4228	3056	3191	3258	2347	2131	2505	Xpot
ENSMUSG00000039275	3957	3998	3684	2240	2439	2553	1967	1713	2177	Foxk2
ENSMUSG00000068036	2863	2291	3029	3463	3103	3184	3150	2379	4295	Afdn
ENSMUSG00000038274	4886	5295	3872	1848	1578	1550	1384	2064	1548	Fau
ENSMUSG00000041879	4802	4408	4375	1947	2244	2301	1577	1252	1569	Ipo9
ENSMUSG00000029432	2117	2096	1884	3732	3338	3369	3741	3930	4004	Nipsnap2
ENSMUSG00000025162	3503	3210	3147	2929	2927	2745	2664	2632	2761	Csnk1d
ENSMUSG00000022517	2141	2480	2257	3721	3179	3386	3732	3096	3514	Mgrn1
ENSMUSG00000090862	5550	6600	5188	1463	1349	1372	936	1744	1123	Rps13
ENSMUSG00000017781	2887	3031	2828	3153	2856	3110	3613	4152	3371	Pitpna
ENSMUSG00000026229	4341	3629	4038	2198	2442	2589	2339	2576	2415	Psmd1
ENSMUSG00000037010	7265	8323	6909	564	802	891	74	101	76	Apln
ENSMUSG00000018362	6610	4327	3642	999	1145	1385	715	923	827	Kpna2
ENSMUSG00000000538	2039	2165	2195	4849	4152	4513	5366	4574	5820	Tom1l2
ENSMUSG00000024091	3580	3870	3898	2098	2142	2500	2160	2762	2281	Vapa
ENSMUSG00000029033	3615	3848	3818	2056	1880	2161	1132	1207	1414	Acap3
ENSMUSG00000003233	2715	3042	2893	3125	2631	2678	2434	1755	2772	Dvl3
ENSMUSG00000054423	1069	1137	1324	4340	5013	4708	6426	5823	6321	Cadps
ENSMUSG00000023845	2381	1708	3351	3136	3275	2780	4849	3132	4064	Lnpep
ENSMUSG00000022312	4471	4601	3709	1989	2102	2192	1666	2357	1913	Eif3h
ENSMUSG00000026260	2650	3157	2382	3268	3091	3139	3341	3990	3133	Ndufa10
ENSMUSG00000041530	3017	2881	3041	2459	2531	2450	2401	1660	2599	Ago1
ENSMUSG00000037999	3549	1938	4677	2763	2956	3043	1787	1698	2003	Arap2
ENSMUSG00000022537	1797	1838	2035	5625	4764	4820	2332	2073	2871	Tmem44
ENSMUSG00000008575	4421	2752	4764	1983	2067	1919	2100	1660	2291	Nfib
ENSMUSG00000031812	1776	1893	1562	4178	3827	3888	5103	6768	5304	Map1lc3b
ENSMUSG00000035093	2167	1348	2338	3804	4005	3605	2941	2507	2982	Secisbp2l
ENSMUSG00000030105	2544	2469	2250	3280	3868	3895	3795	4189	4115	Arl8b
ENSMUSG00000029020	2116	2258	2145	3930	3406	3614	4031	3469	4096	Mfn2
ENSMUSG00000040289	478	678	606	2466	4776	4197	6480	9196	6081	Hey1
ENSMUSG00000005034	3613	3455	4855	2949	2958	2768	3061	2769	3002	Prkacb
ENSMUSG00000024639	3439	2361	3475	2359	3110	3017	2464	1810	2192	Gnaq
ENSMUSG00000058454	2571	3106	3152	1262	1520	1560	1350	1465	1640	Dhcr7
ENSMUSG00000026003	2650	2331	2277	3018	2798	2702	3069	3948	3440	Acadl
ENSMUSG00000109324	6618	6755	5607	1279	1488	1445	1158	1527	1182	Prmt1
ENSMUSG00000019647	3297	2772	3012	2589	3864	3699	938	808	1501	Sema6a
ENSMUSG00000042520	4085	3816	4101	2455	2298	2315	2390	1541	2538	Ubap2l
ENSMUSG00000030655	2754	1749	3194	3207	3416	3330	3618	1943	4274	Smg1
ENSMUSG00000052534	1766	1243	1619	3632	3875	3847	4866	3062	4043	Pbx1
ENSMUSG00000022982	2834	2998	2549	3503	3230	3030	3109	4915	3295	Sod1
ENSMUSG00000038119	3698	3111	3299	1806	2454	2736	3195	2247	3823	Cdon
ENSMUSG00000020964	2643	2564	3316	3076	3099	3011	2924	2496	3124	Sel1l
ENSMUSG00000021242	2430	2809	2454	3459	3108	3125	2880	4439	3405	Npc2
ENSMUSG00000017721	2804	3000	2445	2926	3077	3133	2826	3057	2790	Pigt
ENSMUSG00000029810	1978	2465	2082	2942	2544	2792	3456	4416	3285	Tmem176b
ENSMUSG00000074698	3302	2706	3435	2562	2635	2810	2740	2385	2676	Csnk2a1
ENSMUSG00000000171	2792	3240	2466	2988	2861	2649	2627	3918	2702	Sdhd
ENSMUSG00000048388	3057	2025	2990	2977	2846	2627	1452	1566	1625	Fam171b
ENSMUSG00000027423	3442	3262	3656	2189	2570	2623	2485	3283	2820	Snx5
ENSMUSG00000022185	3419	3149	3700	2872	2357	2187	2471	1919	2224	Acin1
ENSMUSG00000020290	3956	2351	4213	1778	1862	2177	2152	1616	2156	Xpo1
ENSMUSG00000024966	5101	5336	4844	1482	1476	1654	1546	1547	1499	Stip1
ENSMUSG00000040761	3143	2637	2597	3908	3267	2736	2883	1128	2906	Spen
ENSMUSG00000037149	4282	3533	4014	1882	2253	2307	1945	2474	1943	Ddx1
ENSMUSG00000020532	3228	3037	2990	2470	2603	2373	1795	1292	1980	Acaca
ENSMUSG00000022781	3732	2885	3507	2400	2608	2684	2889	2643	2698	Pak2
ENSMUSG00000004071	2151	2331	2321	3815	3668	3638	4500	4487	4912	Cdip1
ENSMUSG00000024921	907	756	1374	5894	6447	6283	3476	2800	3575	Smarca2
ENSMUSG00000021488	3041	2162	3421	2826	2878	2614	2229	1225	2261	Nsd1
ENSMUSG00000022708	1262	989	1747	4554	4357	3011	10030	4086	8473	Zbtb20
ENSMUSG00000001424	3745	4078	3362	2348	2187	2230	2456	2728	2459	Snd1
ENSMUSG00000025555	2830	2755	2339	4119	3885	3486	3455	2483	3506	Farp1
ENSMUSG00000035545	1438	1632	2314	4147	3703	2715	4524	3099	4456	Leng8
ENSMUSG00000024121	2707	3384	2680	3348	3168	3166	2877	3747	2959	Atp6v0c
ENSMUSG00000022114	3742	3871	2941	2890	2349	2758	706	863	1035	Spry2
ENSMUSG00000020923	3638	3550	3005	2433	2462	2632	3007	3397	3305	Ubtf
ENSMUSG00000038429	3603	3534	3096	2508	2428	2334	2321	2607	2377	Usp5
ENSMUSG00000024587	4459	3819	4975	2320	2431	2374	1873	2445	2195	Nars
ENSMUSG00000089704	3315	3134	3042	2462	2551	2772	2334	2134	2353	Galnt2
ENSMUSG00000034135	3380	4000	4115	3582	2723	2639	2947	2299	2660	Sik3
ENSMUSG00000022016	2876	1726	3279	2916	3578	3164	4439	3220	3689	Akap11
ENSMUSG00000032702	171	155	128	5290	7662	7770	2179	2134	2888	Kank1
ENSMUSG00000053166	1424	1553	1463	2873	4688	3583	4428	5778	4326	Cdh22
ENSMUSG00000021133	2694	2682	2327	4643	3883	3809	4079	3324	4116	Susd6
ENSMUSG00000020263	806	728	775	4759	5138	4410	5502	5549	8152	Appl2
ENSMUSG00000004056	2700	2994	2449	3901	3030	3238	2446	2413	2493	Akt2
ENSMUSG00000031715	4647	2713	4992	1621	1854	1573	2211	2413	2063	Smarca5
ENSMUSG00000020135	798	954	1145	5207	3850	3749	3372	2096	3162	Apc2
ENSMUSG00000053702	769	689	1233	3149	3411	3342	5585	4461	5220	Nebl
ENSMUSG00000022389	2448	2855	2749	4062	4127	3591	3521	3890	3859	Tef
ENSMUSG00000032336	2779	2694	2925	2962	3472	3291	2438	3109	2518	Nptn
ENSMUSG00000027223	3537	4159	3677	2359	1734	1773	4094	4470	3521	Mapk8ip1
ENSMUSG00000093904	3710	3809	3199	2751	3158	2894	2665	3021	2634	Tomm20
ENSMUSG00000028478	3628	4532	3435	2453	2129	2005	2191	2941	2176	Clta
ENSMUSG00000089715	3062	2711	2771	3396	2942	2677	2909	2473	2950	Cbx6
ENSMUSG00000057863	4329	5092	3788	1928	1600	1483	1346	2216	1402	Rpl36
ENSMUSG00000018481	3119	2261	3118	2700	3016	3057	2515	2088	2712	Appbp2
ENSMUSG00000005779	4189	4580	3776	1926	1852	2029	1850	3028	1971	Psmb4
ENSMUSG00000000420	2896	2093	2849	2676	3169	2936	3295	3930	3377	Galnt1
ENSMUSG00000028156	4511	3774	4270	1780	2146	2307	1921	2447	1847	Eif4e
ENSMUSG00000026150	2314	2117	2379	2940	3598	3346	3202	4041	3573	Mff
ENSMUSG00000032570	2019	1583	2281	3215	3446	3146	4032	3853	4127	Atp2c1
ENSMUSG00000021248	3651	3117	3397	2244	2375	2356	3608	3488	3381	Tmed10
ENSMUSG00000037347	3587	3640	3302	2012	1940	2471	187	240	230	Chst7
ENSMUSG00000034566	2445	2797	2152	3068	2817	2697	2610	4230	2910	Atp5h
ENSMUSG00000034781	3805	3888	3292	2559	2311	2481	1961	1828	2227	Gna11
ENSMUSG00000035621	4176	4086	2735	1925	1439	1787	1503	1205	1709	Midn
ENSMUSG00000067194	3753	2751	3133	2438	2570	2645	2927	3035	2801	Eif1ax
ENSMUSG00000028266	3344	4006	3615	2167	2328	2265	4744	5003	3169	Lmo4
ENSMUSG00000026490	2255	1413	2545	4221	4285	4001	3905	2633	4318	Cdc42bpa
ENSMUSG00000037916	2156	2262	1885	3770	3324	3201	3297	4713	3369	Ndufv1
ENSMUSG00000062604	2258	1759	2656	3525	3132	3125	3160	2968	3341	Srpk2
ENSMUSG00000028757	3419	3670	3066	2283	2419	2451	1491	1953	1690	Ddost
ENSMUSG00000050565	3035	2581	2633	2887	2759	2694	2530	2685	2456	Tor1aip2
ENSMUSG00000007739	4715	4472	4776	1680	1680	1840	1951	2433	2027	Cct4
ENSMUSG00000053510	3581	3018	4035	2343	2152	2156	2155	2033	2255	Nrd1
ENSMUSG00000026944	2425	2679	2558	3619	3002	2651	3076	1898	3123	Abca2
ENSMUSG00000039270	2636	1515	2281	3023	4092	3568	5211	4287	4995	Megf9
ENSMUSG00000032244	3937	2778	3112	2148	2250	2507	2451	1973	2630	Fem1b
ENSMUSG00000037111	2226	1884	2626	3794	3332	3637	5593	3723	4851	Setd7
ENSMUSG00000027350	35	25	20	6019	4483	4512	5726	9278	5435	Chgb
ENSMUSG00000030189	5962	6223	5466	1123	984	1000	1346	1522	1390	Ybx3
ENSMUSG00000024780	1564	1196	1549	4132	4413	3824	3942	3361	4321	Cdc37l1
ENSMUSG00000017677	2791	2090	3636	3795	2600	2359	4075	4025	4316	Wsb1
ENSMUSG00000029405	4262	3233	3882	2026	2226	2287	2199	2334	2278	G3bp2
ENSMUSG00000002968	3672	4138	3102	2076	1824	1877	2782	2347	2676	Med25
ENSMUSG00000003378	2191	2803	2741	3207	2418	2615	2123	2033	2234	Grik5
ENSMUSG00000050608	2931	3073	2790	2682	2630	2458	2576	3847	2878	Micos10
ENSMUSG00000020198	2870	2774	2486	3278	2881	3146	2686	2257	3032	Ap3d1
ENSMUSG00000032470	908	854	807	5752	5017	5377	3099	2452	3186	Mras
ENSMUSG00000040351	2406	1719	2679	3064	3474	3417	2731	2828	3038	Ankib1
ENSMUSG00000020132	1962	1845	2144	3358	3556	3473	3643	3871	3504	Rab21
ENSMUSG00000054717	6264	4028	3858	450	661	587	265	390	256	Hmgb2
ENSMUSG00000026123	1421	1734	1599	4135	3607	3982	4924	4968	4805	Plekhb2
ENSMUSG00000008348	1765	2733	2785	5204	3446	2269	4990	4643	2573	Ubc
ENSMUSG00000042444	1545	986	1751	2916	3318	3163	4277	3936	4839	Mindy2
ENSMUSG00000090841	2697	3517	2678	2912	2105	1919	3101	5170	3237	Myl6
ENSMUSG00000027312	2041	1593	2034	3343	3275	3197	6719	5410	6808	Atrn
ENSMUSG00000020052	1926	1796	1267	4021	3307	3045	1445	1566	2191	Ascl1
ENSMUSG00000038740	2811	2885	2537	2692	2969	2957	3572	2918	3669	Mvb12b
ENSMUSG00000051469	2885	2043	3122	2921	2935	2451	2054	2386	2260	Zfp24
ENSMUSG00000028405	2998	3139	3127	2381	2109	2234	2342	2271	2379	Aco1
ENSMUSG00000040463	5883	6232	5623	1501	1535	1601	1452	1233	1421	Mybbp1a
ENSMUSG00000017765	1696	2014	2078	4012	3300	3480	2877	2849	3143	Slc12a4
ENSMUSG00000062933	5196	4612	1687	3779	1204	735	2462	4411	1221	Gm10123
ENSMUSG00000046671	1362	1636	1431	3534	3328	3198	6312	8557	5565	Mtfr1l
ENSMUSG00000039852	2808	2944	2917	3437	2472	2506	2369	1594	2469	Rere
ENSMUSG00000015149	1622	1762	1561	4092	3624	3587	4249	4383	4541	Sirt2
ENSMUSG00000074781	3330	3253	3274	2106	2504	2477	2127	2672	2360	Ube2n
ENSMUSG00000014769	3924	4188	3601	2027	1996	1969	2015	3076	2086	Psmb1
ENSMUSG00000020668	1976	1979	2239	3026	3497	3730	1355	1094	1560	Kif3c
ENSMUSG00000028149	2078	1868	2058	3199	3141	3295	2845	3020	3218	Rap1gds1
ENSMUSG00000021703	5046	4547	3806	848	831	890	2051	1282	1574	Serinc5
ENSMUSG00000008892	3978	3887	3308	1875	2036	1982	2234	3142	2165	Vdac3
ENSMUSG00000078622	2240	1326	2781	2797	3146	2767	2318	2875	2580	Ccdc47
ENSMUSG00000034570	5	17	32	8789	6328	6719	1567	1587	1471	Inpp5j
ENSMUSG00000056342	2873	1636	3592	2789	3231	2965	2710	1641	2655	Usp34
ENSMUSG00000057133	2510	1565	2553	3478	3021	2870	2383	1343	2588	Chd6
ENSMUSG00000029030	1583	1876	1525	4098	3517	3385	4252	5534	4966	Tprgl
ENSMUSG00000021486	4972	4958	4011	1546	1470	1525	1418	2020	1456	Prelid1
ENSMUSG00000004535	1958	1127	2523	3362	3324	3130	3864	4727	4139	Tax1bp1
ENSMUSG00000030058	3288	3484	3154	2449	2594	2618	2333	2070	2396	Copg1
ENSMUSG00000027210	2571	1886	2679	2636	2595	2290	4610	3862	4235	Meis2
ENSMUSG00000028565	2939	2159	2763	2768	2930	2670	2771	2515	3275	Nfia
ENSMUSG00000034290	2207	2083	2184	3345	3162	3289	3690	3398	3820	Nek9
ENSMUSG00000059263	2906	1788	3139	2401	2979	2687	2743	2514	2926	Usp47
ENSMUSG00000027808	3307	3460	3217	2078	2246	2481	2007	2369	2110	Serp1
ENSMUSG00000007670	4120	4059	3515	2021	1835	1812	1632	1255	1612	Khsrp
ENSMUSG00000053646	1990	1798	1937	3306	2875	2909	4716	2969	4690	Plxnb1
ENSMUSG00000054263	1160	1052	1151	3917	4676	3937	3257	2530	3531	Lifr
ENSMUSG00000038482	5884	5223	4539	819	1223	1242	934	1076	922	Tfdp1
ENSMUSG00000068747	2728	2481	2449	2501	2166	2431	3681	2749	3719	Sort1
ENSMUSG00000040524	1974	1766	1825	2703	3483	3072	3886	2260	3938	Zfp609
ENSMUSG00000027282	3006	3108	2738	2332	2773	2765	2462	3589	2584	Mtch2
ENSMUSG00000028152	1945	2467	2277	1838	2764	2852	2558	2492	3033	Tspan5
ENSMUSG00000018567	2724	2773	2445	2405	2089	2288	2766	3862	3193	Gabarap
ENSMUSG00000038084	2590	1881	2564	2894	3084	2959	2985	2578	2926	Opa1
ENSMUSG00000038497	866	863	853	5099	4674	4997	2842	3268	3661	Tmco3
ENSMUSG00000037331	4053	3341	4083	2432	2461	2463	2139	1747	2136	Larp1
ENSMUSG00000021273	2562	3126	3066	991	1632	1452	1729	3292	2413	Fdft1
ENSMUSG00000003038	4665	4826	3205	661	1184	928	864	1006	792	Hmgn2
ENSMUSG00000028124	1637	1343	1443	3542	4281	3796	5520	6678	5451	Gclm
ENSMUSG00000032612	3366	3352	3210	2327	2228	2297	2418	2808	2485	Usp4
ENSMUSG00000085438	2496	1593	2786	3272	2761	2508	2735	2041	2813	Oip5os1
ENSMUSG00000051790	2894	3107	3243	2931	2140	2196	1745	1385	1806	Nlgn2
ENSMUSG00000022710	3573	2676	3506	2449	2598	2575	2543	2462	2558	Usp7
ENSMUSG00000037608	4136	2319	4324	2355	2612	1985	2309	2235	2189	Bclaf1
ENSMUSG00000032485	2649	2918	2747	3114	2930	3105	2911	2873	3128	Scap
ENSMUSG00000027593	4678	4310	3553	1743	1645	1750	1507	1992	1475	Raly
ENSMUSG00000059534	1704	2316	1714	3588	3120	2948	2789	4842	2974	Uqcr10
ENSMUSG00000029178	3222	2735	3604	1667	2466	3401	1497	1608	1393	Klf3
ENSMUSG00000032536	2250	2363	2220	3196	3119	2936	3011	2280	2954	Trak1
ENSMUSG00000041773	4274	4489	3424	473	1321	1263	2539	2727	2481	Enc1
ENSMUSG00000008035	1744	1952	1748	2763	2459	2314	3406	4291	3354	Mid1ip1
ENSMUSG00000006134	3205	2809	2689	2624	2497	2591	2073	1955	2373	Crkl
ENSMUSG00000033721	5256	4149	6362	2154	2563	2193	804	985	1206	Vav3
ENSMUSG00000022890	2274	2290	2236	2882	2577	2503	2575	3937	3093	Atp5j
ENSMUSG00000030168	1915	2087	1716	3378	3665	3285	3984	3836	3573	Adipor2
ENSMUSG00000015120	4324	4225	3963	1842	1959	1667	1763	1711	1900	Ube2i
ENSMUSG00000034055	751	612	775	6002	5560	5390	1315	1718	1944	Phka1
ENSMUSG00000008730	2686	2096	2548	2839	2655	2678	4688	3189	4063	Hipk1
ENSMUSG00000029505	3413	3096	3222	2222	2117	2104	2115	1079	2163	Ep400
ENSMUSG00000052707	3241	1902	3051	2329	2448	2194	2710	1775	2836	Tnrc6a
ENSMUSG00000026496	5083	4215	3957	1329	1293	1443	1042	820	1143	Parp1
ENSMUSG00000027646	3376	3670	3101	1944	1822	1789	1162	1115	1227	Src
ENSMUSG00000021178	3981	3744	3715	1908	2047	1927	1782	2672	2009	Psmc1
ENSMUSG00000031467	2185	2196	2307	3114	3560	3781	2978	3080	2810	Agpat5
ENSMUSG00000036377	3420	2640	3085	1791	2852	2600	2408	2032	2854	Cracd
ENSMUSG00000032601	2866	2091	2678	2704	3111	2888	2758	2366	2722	Prkar2a
ENSMUSG00000013662	2719	2087	3170	2594	2751	2775	2573	3635	2967	Atad1
ENSMUSG00000021819	3017	3035	2891	2994	2789	2429	2685	1894	2870	Zswim8
ENSMUSG00000036667	2914	2060	3302	2636	2224	2004	3114	2462	2806	Tcaf1
ENSMUSG00000058355	4294	2793	4715	1509	1753	1878	1748	1804	1695	Abce1
ENSMUSG00000070544	3458	1938	4011	2142	1979	2204	1883	1583	1948	Top1
ENSMUSG00000058600	5343	4245	4323	1148	1014	1660	893	2068	1509	Rpl30
ENSMUSG00000029669	2574	2063	2633	2726	3106	3197	1659	2246	1836	Tspan12
ENSMUSG00000028809	4079	3805	3546	1885	1971	1856	1979	1582	2007	Srrm1
ENSMUSG00000009013	3187	3040	2825	1485	1433	1860	1386	2020	1505	Dynll1
ENSMUSG00000040711	4979	4694	5619	1211	1114	1074	1762	1561	2076	Sh3pxd2b
ENSMUSG00000021484	2700	2737	2338	2711	2537	2806	2767	2524	2878	Lman2
ENSMUSG00000055485	3585	2781	2639	1905	1770	1864	1480	437	1462	Soga1
ENSMUSG00000025314	1635	1452	1584	4978	5734	5256	852	814	1215	Ptprj
ENSMUSG00000028960	3118	2977	3047	2427	2355	2142	2246	1879	2175	Ube4b
ENSMUSG00000029577	2508	2743	2521	2676	2350	2426	2083	1697	2108	Ube3b
ENSMUSG00000033228	3511	2189	3550	2210	2455	2179	2449	1884	2363	Scaf11
ENSMUSG00000021010	2109	1877	2444	3222	3823	3488	1403	1348	1534	Npas3
ENSMUSG00000024099	2522	2765	2205	2676	2668	2499	2322	3832	2590	Ndufv2
ENSMUSG00000032178	4164	3844	3729	1733	1679	1618	1462	1303	1560	Ilf3
ENSMUSG00000039844	3970	3903	3327	2496	2231	2245	2304	1794	2423	Rapgef1
ENSMUSG00000022752	4391	3139	4562	1517	1821	1751	1768	1900	1732	Tomm70a
ENSMUSG00000034707	2247	2268	2302	2981	2967	3093	3047	2625	3152	Gns
ENSMUSG00000037236	3889	2102	3851	2071	2443	2292	2052	2774	2144	Matr3
ENSMUSG00000020647	1498	1179	1581	3829	3609	3121	3808	2442	4019	Ncoa1
ENSMUSG00000014077	1975	2047	2042	3099	3004	3101	2784	3201	2826	Chp1
ENSMUSG00000013858	2566	2629	2441	3154	2938	2718	2199	2656	2519	Tmem259
ENSMUSG00000037351	3148	3317	3021	2194	2247	2280	2472	2759	2482	Actr1b
ENSMUSG00000019777	4154	3342	4310	1489	1482	1529	1300	1619	1329	Hdac2
ENSMUSG00000030541	4529	4656	3544	1089	1031	1165	2458	2567	2197	Idh2
ENSMUSG00000044864	2206	2303	2245	2379	3060	3304	1894	1694	2334	Ankrd50
ENSMUSG00000006498	5227	5232	4186	1044	1422	1318	2793	2351	2111	Ptbp1
ENSMUSG00000026817	2572	3017	2453	2188	2074	1980	4027	4466	3673	Ak1
ENSMUSG00000008855	3084	3402	4048	2955	2055	2282	1890	1739	2422	Hdac5
ENSMUSG00000037855	5561	5258	5455	979	863	988	1120	958	1105	Zfp365
ENSMUSG00000054364	1516	2070	1943	2357	3602	3692	4297	5893	2735	Rhob
ENSMUSG00000031835	3267	3227	3071	2114	2091	1979	1720	1416	1851	Mbtps1
ENSMUSG00000000305	5102	5078	4305	1223	901	1225	463	233	499	Cdh4
ENSMUSG00000033047	4160	4244	3377	1714	1764	1890	1721	2324	1861	Eif3l
ENSMUSG00000031353	4272	3446	3495	1727	1992	1959	2007	2715	2078	Rbbp7
ENSMUSG00000054455	2621	2892	2607	2661	2643	2698	2778	2782	2876	Vapb
ENSMUSG00000024360	4408	3159	4434	1610	2008	1876	1969	2336	1967	Etf1
ENSMUSG00000028879	3028	2838	2829	2315	2416	2428	1969	2632	2012	Stx12
ENSMUSG00000046785	1628	1107	1726	2921	4178	3563	3248	2903	3393	Epm2aip1
ENSMUSG00000028991	2349	2374	2417	2780	2243	2238	2808	1814	3006	Mtor
ENSMUSG00000034168	3410	3429	2925	2151	1928	2114	871	907	928	Irf2bpl
ENSMUSG00000031246	2099	1367	2956	2636	3324	2767	2735	3713	2611	Sh3bgrl
ENSMUSG00000021608	3038	2747	2374	1785	2042	1833	964	928	804	Lpcat1
ENSMUSG00000031841	4299	4595	3946	1637	1801	1697	1087	1193	1498	Cdh13
ENSMUSG00000044477	2336	2714	2354	2827	2924	2876	2675	3209	2889	Zfand3
ENSMUSG00000032481	5308	4032	4314	1433	1379	1309	1523	1290	1618	Smarcc1
ENSMUSG00000021190	739	770	751	3655	3578	3493	3352	4795	3358	Lgmn
ENSMUSG00000030374	3206	3458	3150	2322	2220	2178	1641	1499	1600	Strn4
ENSMUSG00000038664	2891	1781	3255	2721	2361	2452	2627	1353	2714	Herc1
ENSMUSG00000019818	2251	1763	2173	3124	3362	3361	2695	2920	2765	Cd164
ENSMUSG00000029777	5131	5650	5342	1299	1344	1501	1039	1255	1015	Gars
ENSMUSG00000000751	3098	2542	1806	2435	2832	2803	3174	4045	3424	Rpa1
ENSMUSG00000029291	2448	1785	2641	2920	2897	2939	3103	3389	3372	Rufy3
ENSMUSG00000042506	4593	4164	3824	1725	1420	1523	2193	1585	1985	Usp22
ENSMUSG00000079641	3813	4337	3354	1539	1593	1589	1157	1927	1323	Rpl39
ENSMUSG00000030207	1832	1974	1850	3115	2606	2769	1903	1712	2024	Fam234b
ENSMUSG00000039367	2587	2574	2832	2487	2146	2375	1854	1425	2060	Sec24c
ENSMUSG00000048756	2028	2035	1851	3707	2897	2854	5751	4504	5964	Foxo3
ENSMUSG00000020811	5366	5235	4410	633	711	848	893	898	1175	Wscd1
ENSMUSG00000003873	3769	4170	3577	2032	1817	1635	1564	2685	2000	Bax
ENSMUSG00000051910	3197	2348	3467	1438	1599	1735	2673	1650	2714	Sox6
ENSMUSG00000024248	2346	2479	2083	2614	2422	2318	1896	3059	2136	Cox7a2l
ENSMUSG00000033004	2772	1647	3285	2670	2898	2451	2896	1512	3242	Mycbp2
ENSMUSG00000022255	2936	1851	3221	2727	2674	2793	2058	2225	2307	Mtdh
ENSMUSG00000038914	2766	2576	2945	2896	2889	2298	2764	1856	2399	Dido1
ENSMUSG00000022110	1734	1516	1940	3254	3273	3006	3216	4488	3322	Sucla2
ENSMUSG00000031441	3504	3504	4282	1534	1405	1544	2527	1698	2544	Atp11a
ENSMUSG00000009291	1361	1656	1447	3723	3411	3706	3989	4441	4034	Pttg1ip
ENSMUSG00000026821	1854	1954	1632	4082	3798	3591	2526	2352	2818	Ralgds
ENSMUSG00000019907	3846	2199	4098	2300	2092	1912	1853	1573	1926	Ppp1r12a
ENSMUSG00000035133	1843	1109	2143	2371	2956	2022	7146	6831	6228	Arhgap5
ENSMUSG00000018411	2472	2329	2553	3071	1656	1842	4692	3506	5065	Mapt
ENSMUSG00000048154	2182	2026	2440	3100	2833	2648	2249	1217	2441	Kmt2d
ENSMUSG00000025224	2808	2788	2853	2210	2025	2338	1806	1048	1898	Gbf1
ENSMUSG00000046324	2066	1694	2249	3097	2811	2899	1866	1618	1894	Ermp1
ENSMUSG00000004455	4234	3287	3141	1548	1812	1771	1531	1893	1721	Ppp1cc
ENSMUSG00000028248	1318	1035	2056	3270	3129	2682	3664	3031	4009	Pnisr
ENSMUSG00000028955	2930	2800	2796	1930	2014	2000	2021	2555	1982	Vamp3
ENSMUSG00000031511	4018	3646	3570	1602	1583	1667	2061	1732	2028	Arhgef7
ENSMUSG00000006005	2806	1654	3288	2528	2845	2080	2359	2088	2328	Tpr
ENSMUSG00000038459	2557	2598	2561	1752	2317	2341	1601	2169	1695	Abhd17c
ENSMUSG00000029998	2376	2394	1979	3099	2642	2780	2333	2230	2609	Pcyox1
ENSMUSG00000052727	5636	4268	6534	523	1680	1154	3519	2133	3094	Map1b
ENSMUSG00000022957	2413	2220	2799	2244	1882	2096	5274	3434	4337	Itsn1
ENSMUSG00000020460	2381	2471	6713	781	682	732	474	1572	1309	Rps27a
ENSMUSG00000029723	1016	1000	941	3758	2899	2710	5060	6784	5179	Tsc22d4
ENSMUSG00000021048	3338	3531	2903	1662	1943	2123	2688	2764	2691	Mthfd1
ENSMUSG00000024298	2184	1465	2884	2746	2645	2457	2563	1677	2458	Zfp871
ENSMUSG00000017670	2167	2272	1990	4415	3322	3265	3282	3358	3547	Elmo2
ENSMUSG00000021256	3262	3197	3341	2423	1798	2145	541	361	611	Vash1
ENSMUSG00000055013	3217	2824	2909	1832	1966	1958	1445	950	1414	Agap1
ENSMUSG00000046985	1329	1175	1212	2733	4362	3586	5265	6831	5554	Tapt1
ENSMUSG00000028053	2147	1401	2345	2991	3293	2924	2791	1684	2847	Ash1l
ENSMUSG00000060002	685	560	931	4661	4709	3994	4555	4219	4476	Chpt1
ENSMUSG00000027634	1625	1825	1874	3147	3149	2959	3159	3097	3209	Ndrg3
ENSMUSG00000037234	2329	1688	3402	2852	2949	2289	2774	1589	2658	Hook3
ENSMUSG00000026867	3051	2381	2941	2159	2136	2250	2368	1759	2433	Gapvd1
ENSMUSG00000033732	4430	3964	3954	1390	1504	1819	1715	1612	1878	Sf3b3
ENSMUSG00000006476	1626	1901	1711	2213	2283	2070	4141	4154	3642	Nsmf
ENSMUSG00000038467	2371	2769	2382	2597	2226	2317	2551	3260	2518	Chmp4b
ENSMUSG00000002102	3396	3410	2714	2057	1982	1826	2117	3296	2180	Psmc3
ENSMUSG00000020220	1348	1420	1687	3885	3492	3445	3072	1587	3040	Vps13d
ENSMUSG00000028284	2949	2216	2627	2093	2511	2365	2098	1802	2133	Map3k7
ENSMUSG00000032594	1577	1679	1660	4515	3374	3233	3840	3580	3761	Ip6k1
ENSMUSG00000015755	1983	1541	1949	3325	2754	2424	5313	4499	4868	Tab2
ENSMUSG00000004364	2812	1717	2745	2453	2810	2657	2325	2560	2475	Cul3
ENSMUSG00000016946	1602	1774	1491	3107	3477	2555	5131	7255	4954	Kctd5
ENSMUSG00000038546	2523	2370	2346	2247	2473	2405	1864	2172	1930	Ranbp9
ENSMUSG00000029547	2690	2657	2434	2651	2305	2399	1990	1472	2124	Ints1
ENSMUSG00000000753	19	7	23	8925	7336	8909	7380	8769	6358	Serpinf1
ENSMUSG00000024812	1013	942	760	4274	3905	3655	2747	2762	3643	Tjp2
ENSMUSG00000038690	2231	2585	1929	2570	2309	2228	2226	3900	2603	Atp5j2
ENSMUSG00000041133	3870	1972	3592	1588	1608	1647	1454	1474	1483	Smc1a
ENSMUSG00000064302	2752	2292	2833	2254	2371	2137	2885	1854	2623	Clasp1
ENSMUSG00000024140	254	296	353	5591	4814	5816	1895	1362	1501	Epas1
ENSMUSG00000030591	3010	3513	2821	1966	1965	1941	1805	2703	1989	Psmd8
ENSMUSG00000026554	1827	1955	2032	3290	2675	2533	2778	2488	2929	Dcaf8
ENSMUSG00000002222	1755	1304	1978	2759	2835	2717	3191	2876	3400	Rmnd5a
ENSMUSG00000047557	793	948	790	1469	1895	1958	10214	14035	10660	Lxn
ENSMUSG00000034928	2966	3013	3085	2344	2004	2067	1971	1749	2182	Rnf44
ENSMUSG00000013160	2381	2680	2362	2374	2229	2456	2614	3341	2655	Atp6v0d1
ENSMUSG00000024827	2006	2153	1987	3072	2206	2609	1754	1553	2126	Gldc
ENSMUSG00000025862	3256	1682	3357	2282	2435	2223	2079	2105	2072	Stag2
ENSMUSG00000020589	2383	1866	2509	3092	2931	2686	2626	3015	2845	Cyria
ENSMUSG00000040430	1375	936	1196	4372	3781	3733	3619	3341	4909	Pitpnc1
ENSMUSG00000000567	3085	3156	2392	2001	1471	1216	6334	4212	5710	Sox9
ENSMUSG00000009630	3198	3173	2784	2309	2386	2168	2446	3286	2451	Ppp2cb
ENSMUSG00000020946	1967	2178	1818	2677	2995	2882	3057	3413	3038	Gosr2
ENSMUSG00000069806	2096	2005	1829	2934	2345	2342	2840	2957	3049	Cacng7
ENSMUSG00000032418	2720	2647	2940	1397	2138	2040	2044	3142	2270	Me1
ENSMUSG00000020015	3369	3271	3580	1533	1799	1951	3013	3270	3157	Cdk17
ENSMUSG00000020167	3648	3426	2753	2071	1875	1816	1514	1510	1651	Tcf3
ENSMUSG00000022037	316	444	278	995	1322	1659	15855	15653	16263	Clu
ENSMUSG00000057335	3577	2032	3815	1465	1473	1370	1828	1250	1832	Cep170
ENSMUSG00000040481	3024	1909	2999	2296	2239	2041	2077	1120	2072	Bptf
ENSMUSG00000032580	1859	1603	2365	2728	2402	2246	2524	1911	2594	Rbm5
ENSMUSG00000022789	2127	1433	2880	2460	2772	2519	2850	2833	2662	Dnm1l
ENSMUSG00000025364	4914	4781	4375	1165	1259	1442	1253	1445	1275	Pa2g4
ENSMUSG00000032504	2824	3015	3222	2114	2029	2114	2444	2079	2613	Pdcd6ip
ENSMUSG00000037685	1673	1339	2187	2524	2275	2256	2432	1969	3067	Atp8a1
ENSMUSG00000061589	2605	2607	3234	2078	1682	1742	1459	1049	1505	Dot1l
ENSMUSG00000061410	3433	2923	3218	1840	1747	1766	1995	1340	1896	Zcchc14
ENSMUSG00000046062	3794	3220	2910	1991	2155	2311	1864	1872	1993	Ppp1r15b
ENSMUSG00000020075	4512	3728	5021	1107	1390	1402	1216	1247	1256	Ddx21
ENSMUSG00000003464	1857	2258	1969	2652	2364	2386	2589	2978	2721	Pex19
ENSMUSG00000063632	6159	4351	5528	852	842	835	1178	892	968	Sox11
ENSMUSG00000032740	2056	1107	2541	3015	3090	2475	2562	2171	2872	Ccdc88a
ENSMUSG00000025656	1583	1229	1800	3191	2778	2875	3012	2314	3011	Arhgef9
ENSMUSG00000015087	2700	2771	2638	2582	2203	2085	1704	1527	1793	Rabl6
ENSMUSG00000034636	2203	1461	2294	2568	2444	2445	2972	1838	2691	Zyg11b
ENSMUSG00000020716	2306	1626	2610	2619	2795	2663	2259	1579	2538	Nf1
ENSMUSG00000060206	2345	1728	2293	1980	2183	1624	4644	2805	3956	Zfp462
ENSMUSG00000021279	2750	2730	2593	2692	2381	2217	2685	1938	2950	Cdc42bpb
ENSMUSG00000026827	899	749	905	5038	4980	4756	2591	1859	2232	Gpd2
ENSMUSG00000027162	3114	1754	3577	1972	2326	2067	2327	2779	2256	Lin7c
ENSMUSG00000066037	3106	2133	2996	1925	2210	2040	1980	2002	2030	Hnrnpr
ENSMUSG00000038406	2969	2880	2640	2740	2027	2105	2063	1695	1869	Scaf1
ENSMUSG00000062997	4127	5001	3403	1322	1110	1128	881	1487	986	Rpl35
ENSMUSG00000030894	1229	1445	1589	3189	3065	3307	3242	3027	3439	Tpp1
ENSMUSG00000007029	4608	4960	4405	1182	1067	1167	940	830	889	Vars
ENSMUSG00000054387	2093	1438	2655	2408	2465	2183	2330	1375	2313	Mdm4
ENSMUSG00000022761	2070	2401	2380	2434	2122	2356	2451	2254	2470	Lztr1
ENSMUSG00000061983	3022	5358	4208	1324	1038	957	757	1142	837	Rps12
ENSMUSG00000022332	4674	4504	4929	1780	1496	1723	1325	1641	1461	Khdrbs3
ENSMUSG00000019189	2889	2574	2289	2956	2594	2263	1485	1441	1211	Rnf145
ENSMUSG00000045095	3687	3338	3945	1199	1466	1497	1299	1049	1563	Magi1
ENSMUSG00000029110	3839	3493	3304	1717	1926	1864	1883	2365	1930	Rnf4
ENSMUSG00000023015	5175	3157	2558	643	850	1025	345	368	311	Racgap1
ENSMUSG00000020111	1871	1965	1392	2977	2944	2955	2496	3139	2427	Micu1
ENSMUSG00000020936	2524	2567	2436	2354	2228	2045	3768	3841	4431	Nmt1
ENSMUSG00000036782	4466	3391	4093	1339	1293	1492	1547	1487	1326	Klhl13
ENSMUSG00000014606	2079	2395	2078	2438	2224	2245	2470	3195	2226	Slc25a11
ENSMUSG00000052889	4723	3435	4415	1065	1386	1444	409	309	478	Prkcb
ENSMUSG00000050627	1847	1917	1665	2761	2436	2734	2288	2289	2478	Gpd1l
ENSMUSG00000021024	2930	2956	2557	1920	2221	2118	1968	3186	2107	Psma6
ENSMUSG00000061436	3063	2194	2443	3366	2683	2601	2175	605	2544	Hipk2
ENSMUSG00000053929	1759	1948	1732	3082	2386	2396	2755	2931	2818	Cyhr1
ENSMUSG00000030753	3459	2272	2665	1851	2244	2146	1831	2054	1903	Thap12
ENSMUSG00000005534	1611	1312	2104	2267	2501	2934	1078	736	1024	Insr
ENSMUSG00000007872	898	1125	766	4014	2852	1907	7524	11309	6069	Id3
ENSMUSG00000028676	3007	2181	3571	1689	1833	1904	2175	2241	2158	Srsf10
ENSMUSG00000021264	3130	2325	2748	2150	2058	2043	1850	1701	1940	Yy1
ENSMUSG00000001473	4346	4186	3367	1701	1635	1691	1167	1348	1157	Tubb6
ENSMUSG00000059146	1321	1303	1621	3968	3540	3143	1136	563	1070	Ntrk3
ENSMUSG00000041220	2567	1570	3412	1173	1361	1244	714	576	893	Elovl6
ENSMUSG00000027309	796	679	893	3764	2976	2821	8173	6303	8591	Dnaaf9
ENSMUSG00000020841	3338	2396	2727	1450	1326	1188	1809	1344	1468	Cpd
ENSMUSG00000036885	839	624	712	2552	2936	3076	3770	4032	4203	Arhgef26
ENSMUSG00000029063	2877	3358	3234	2056	1760	1790	1779	1533	1580	Nadk
ENSMUSG00000029657	2106	1646	2610	2003	2271	2667	3059	3615	3020	Hsph1
ENSMUSG00000043391	1859	1457	2100	2290	2473	2427	1703	1435	1783	2510009E07Rik
ENSMUSG00000025571	2556	2043	2592	2108	2231	1974	1836	1186	1735	Tnrc6c
ENSMUSG00000031167	4597	4224	2658	817	1340	948	808	1570	830	Rbm3
ENSMUSG00000038845	3000	3432	2667	2074	2042	2112	1812	2603	1953	Phb
ENSMUSG00000034674	3589	3427	3211	1603	1707	1625	1278	1574	1416	Tdg
ENSMUSG00000070509	1026	1318	661	3455	2284	1881	5102	3674	4591	Rgma
ENSMUSG00000059005	3751	2110	4134	963	1322	1323	1002	855	949	Hnrnpa3
ENSMUSG00000028180	2407	1667	3491	2332	2554	2187	2891	3003	2799	Zranb2
ENSMUSG00000045333	314	357	375	3564	4140	4226	6057	4990	6755	Zfp423
ENSMUSG00000027276	1768	1227	1510	1997	2611	4430	47	55	132	Jag1
ENSMUSG00000020142	2923	3056	3000	1846	2608	2931	1435	1682	1801	Slc1a4
ENSMUSG00000031591	2351	2403	2772	1926	2135	2028	1461	2375	1994	Asah1
ENSMUSG00000035828	1464	1423	680	3863	3885	3138	2917	3421	2070	Pim3
ENSMUSG00000036644	1592	1848	1801	3269	2957	2840	3074	2596	2887	Tbc1d9b
ENSMUSG00000030754	2656	2404	2720	2034	2187	2288	2346	2632	2447	Copb1
ENSMUSG00000021413	2388	1376	2670	2302	2513	2074	2240	2152	2349	Prpf4b
ENSMUSG00000021987	1250	860	1419	3589	3784	3854	2409	2656	2614	Mtmr6
ENSMUSG00000022136	1216	798	1368	2825	3501	3417	5202	5794	4893	Dnajc3
ENSMUSG00000000605	1800	1439	1771	2888	3132	3212	2715	2757	2969	Clcn4
ENSMUSG00000032076	1234	723	1007	4945	4720	3955	1404	1518	1810	Cadm1
ENSMUSG00000004264	3594	3964	3232	1771	1423	1422	1494	1794	1530	Phb2
ENSMUSG00000025503	2999	3247	2677	1660	1591	1697	2154	2806	2089	Taldo1
ENSMUSG00000003131	3402	2920	3071	1751	2142	1963	2307	2394	2160	Pafah1b2
ENSMUSG00000026443	2542	2955	2495	1863	2200	2125	1760	1878	1665	Lrrn2
ENSMUSG00000030835	3254	3317	3181	2198	2086	2196	1319	1282	1466	Nomo1
ENSMUSG00000022607	2865	2607	3477	1852	1867	1717	1641	1664	1992	Ptk2
ENSMUSG00000003623	776	630	1074	3029	2768	2613	1767	2018	1924	Crot
ENSMUSG00000071054	2804	2426	2792	2205	1863	1794	1797	1840	1890	Safb
ENSMUSG00000016933	2452	2332	2364	2734	2298	2056	1639	1539	1783	Plcg1
ENSMUSG00000024782	1458	1701	1490	2698	2682	2684	4183	4592	4358	Ak3
ENSMUSG00000074102	3490	3456	2611	1806	1684	1739	1763	1438	1688	Rbm15b
ENSMUSG00000055296	2045	1645	2392	2798	2946	2561	3071	2055	2998	Tmem245
ENSMUSG00000023026	3589	3096	3199	1574	1437	1553	2879	2145	3648	Dip2b
ENSMUSG00000022098	1809	1913	2083	2318	2113	2058	2899	2575	2583	Bmp1
ENSMUSG00000030096	3533	3513	3643	2563	2281	1512	3520	2130	2903	Slc6a6
ENSMUSG00000058325	3326	2646	3463	1904	1902	1971	1177	877	1426	Dock1
ENSMUSG00000009112	2530	2461	2232	2504	1967	2179	1812	1382	1876	Bcl2l13
ENSMUSG00000058013	5257	4621	4694	688	645	757	647	464	546	Septin11
ENSMUSG00000030876	2575	2170	2368	1865	2444	2423	1747	2420	1960	Mettl9
ENSMUSG00000024598	4379	3711	7579	112	140	96	36	20	45	Fbn2
ENSMUSG00000042750	5076	5404	5461	530	561	457	729	1147	731	Bex2
ENSMUSG00000021701	6239	6109	5829	648	671	814	456	506	503	Plk2
ENSMUSG00000025139	2635	2604	2118	2442	2577	2734	2744	2939	2919	Tollip
ENSMUSG00000000399	2265	2303	2272	2463	2463	2315	2390	3250	2591	Ndufa9
ENSMUSG00000061950	3254	3046	2620	1977	2958	2741	1628	2175	1876	Ppp4r1
ENSMUSG00000062901	1511	845	1448	3750	2921	2763	3726	3371	4105	Klhl24
ENSMUSG00000041444	2396	2056	2506	2879	2762	2436	2538	1567	2581	Arhgap32
ENSMUSG00000034574	2016	1373	1906	2953	2618	2548	3154	2176	2725	Daam1
ENSMUSG00000034361	1795	2207	2404	1756	1855	2018	2050	1628	1808	Cpne2
ENSMUSG00000020817	1579	997	1997	4355	4148	3261	2481	2849	2837	Rabep1
ENSMUSG00000029104	2619	2416	2660	2064	2173	2350	1963	973	1933	Htt
ENSMUSG00000061306	2139	2300	2108	2352	2090	2230	1498	1485	1653	Slc38a10
ENSMUSG00000026028	1961	1451	2069	2975	2791	2861	2167	1887	2369	Trak2
ENSMUSG00000029364	3752	4067	3534	1411	1416	1612	1260	1421	1441	Wsb2
ENSMUSG00000031819	1527	1344	1197	2965	3125	2818	6260	6915	7071	Emc8
ENSMUSG00000013663	2782	1887	3413	2007	2115	2044	2057	1736	2168	Pten
ENSMUSG00000026426	2777	3072	2491	2011	1641	1492	2844	3356	3002	Arl8a
ENSMUSG00000000168	2220	2179	2252	2546	2208	2330	2066	2001	1987	Dlat
ENSMUSG00000031483	1782	1767	1817	2754	2689	2794	4274	4115	3932	Erlin2
ENSMUSG00000040459	1970	1438	2502	2745	3007	2377	2635	2406	2450	Arglu1
ENSMUSG00000032330	2014	2211	1746	2108	2372	2264	2128	3604	2488	Cox7a2
ENSMUSG00000055531	3294	2478	3422	1754	1867	1810	1786	1629	1755	Cpsf6
ENSMUSG00000003226	3328	1753	3522	2261	2511	1834	2413	2010	2245	Ranbp2
ENSMUSG00000022353	4092	3683	3740	761	1207	1366	3750	3293	4278	Mtss1
ENSMUSG00000000088	2233	2676	2276	2143	1946	1853	2133	3203	2207	Cox5a
ENSMUSG00000025823	2194	2466	2745	1674	1530	1826	2709	2633	2414	Pdia4
ENSMUSG00000026335	3587	3495	3652	1685	1820	1709	1578	1908	1581	Pam
ENSMUSG00000022858	3963	3224	3813	1433	1383	1324	1258	1445	1080	Tra2b
ENSMUSG00000025728	2034	2110	1819	2555	2361	2333	2629	2399	2436	Pigq
ENSMUSG00000052833	4007	3553	2970	1279	1292	1397	1345	1557	1257	Sae1
ENSMUSG00000078652	3542	3579	3573	1552	1690	1717	1813	1770	1684	Psme3
ENSMUSG00000034220	3808	3638	2556	1523	1092	1177	2695	2253	2470	Gpc1
ENSMUSG00000027652	1883	1357	2260	2715	2726	2615	2629	1710	2862	Ralgapb
ENSMUSG00000073639	2002	1710	2150	2343	2419	2468	2887	3685	3064	Rab18
ENSMUSG00000032816	1567	1791	1927	3040	2130	2421	6390	3650	7225	Igdcc4
ENSMUSG00000036781	3452	4629	3219	1320	1151	1111	1259	2172	1588	Rps27l
ENSMUSG00000000001	2954	1974	3083	1773	1686	1580	1691	1935	1816	Gnai3
ENSMUSG00000070003	2648	3007	2545	1850	1853	1707	1141	1423	1161	Ssbp4
ENSMUSG00000021096	2835	2458	2724	2536	2361	2098	2424	2647	2278	Ppm1a
ENSMUSG00000034602	1894	1701	2086	2359	2348	2401	2239	1604	2468	Mon2
ENSMUSG00000047036	1920	1231	2621	2714	2656	2201	2510	1942	2523	Zfp445
ENSMUSG00000044252	584	487	531	3420	3531	3378	4697	4832	4193	Osbpl1a
ENSMUSG00000050840	1879	1790	2048	2702	2367	2204	1352	1635	1808	Cdh20
ENSMUSG00000021986	1059	842	1304	3327	3786	3992	1856	1004	2066	Amer2
ENSMUSG00000029190	1977	1543	2060	2818	2637	2685	3362	3024	3263	D5Ertd579e
ENSMUSG00000003031	2556	1905	1919	2553	1903	1887	2511	2721	2464	Cdkn1b
ENSMUSG00000002718	4112	2970	3061	1265	1560	1621	1286	1363	1258	Cse1l
ENSMUSG00000017493	1203	1319	1184	2769	2640	3032	43	46	39	Igfbp4
ENSMUSG00000026112	2388	2576	2352	2342	2438	2341	2184	2121	2216	Coa5
ENSMUSG00000015937	3905	3640	3215	1950	1445	1473	1748	2056	1616	Macroh2a1
ENSMUSG00000054604	2738	1872	2178	1736	2427	2223	1826	1905	1821	Cggbp1
ENSMUSG00000031231	1729	1890	1758	2358	2396	2330	2389	3959	2736	Cox7b
ENSMUSG00000024427	4840	3758	2658	771	1022	1617	97	79	173	Spry4
ENSMUSG00000038762	3168	2986	3028	1872	1600	1683	1532	1665	1585	Abcf1
ENSMUSG00000031987	2657	2662	2357	2033	1954	1878	1580	1478	1568	Egln1
ENSMUSG00000066705	1144	1174	859	2772	2088	2113	6750	7849	7278	Fxyd6
ENSMUSG00000070923	2374	1700	2561	2101	2037	2258	2204	2042	2238	Klhl9
ENSMUSG00000027201	3452	2169	3224	1235	1514	1394	1125	1053	1200	Myef2
ENSMUSG00000041164	2712	2558	2403	2075	1817	1890	2000	1496	2062	Zmiz2
ENSMUSG00000028798	3405	3897	2928	1798	1655	1754	1345	2167	1429	Eif3i
ENSMUSG00000032293	2731	1532	2783	2267	2242	2184	2361	2087	2459	Ireb2
ENSMUSG00000033379	1769	1969	1549	2971	2806	2750	2204	3539	2511	Atp6v0b
ENSMUSG00000029390	2803	2593	2360	1929	1952	1899	1665	2225	1863	Tmed2
ENSMUSG00000010608	2880	1786	3217	1960	2293	1827	1981	2120	2034	Rbm25
ENSMUSG00000021610	2748	2933	2597	2042	2006	2261	1858	2203	2043	Clptm1l
ENSMUSG00000001783	3464	3460	3048	1520	1608	1425	1314	1881	1440	Rtcb
ENSMUSG00000029093	3551	3456	3553	745	752	796	427	227	501	Sorcs2
ENSMUSG00000034850	1896	1995	1670	2689	2759	2530	3448	2818	3453	Tmem127
ENSMUSG00000000552	2051	2404	2177	2996	2253	2161	1581	1620	1481	Zfp385a
ENSMUSG00000045994	4057	3609	3811	1022	861	870	1247	1202	2464	B3gat1
ENSMUSG00000020790	2806	2397	2785	1970	1976	1937	2208	1610	2142	Ankfy1
ENSMUSG00000024286	2798	2384	2705	2081	2306	2364	1838	1889	1911	Ccny
ENSMUSG00000022307	3142	2667	4900	1327	1434	1537	1170	1350	1337	Oxr1
ENSMUSG00000038587	4993	5417	7809	259	373	456	256	374	314	Akap12
ENSMUSG00000039000	3046	2800	2983	1663	1935	1883	1514	1617	1615	Ube3c
ENSMUSG00000040339	3857	2887	4041	1073	1243	1118	1641	1326	1353	Fam102b
ENSMUSG00000014867	2579	2842	2332	2064	2113	2109	2114	2423	2269	Surf4
ENSMUSG00000006057	2286	2546	2044	1952	2191	2095	2495	4019	2427	Atp5g1
ENSMUSG00000031918	2886	2665	2548	1772	2375	2130	1342	1643	1391	Mtmr2
ENSMUSG00000018548	2971	2007	2450	2000	2062	2114	1829	1904	1993	Trim37
ENSMUSG00000037876	2859	1639	3386	1754	2149	1844	1395	990	1342	Jmjd1c
ENSMUSG00000005615	2301	2331	2311	2180	2290	2388	2228	1944	2470	Pcyt1a
ENSMUSG00000019943	2692	1335	2633	2694	3282	2928	1546	1480	1841	Atp2b1
ENSMUSG00000032867	3065	3508	2704	1938	1679	1770	1929	1821	1846	Fbxw8
ENSMUSG00000026116	2564	2463	2853	2130	2024	2011	2140	1300	2285	Tmem131
ENSMUSG00000026374	2986	2561	2459	1665	1753	1800	2467	2670	2286	Tsn
ENSMUSG00000038156	855	1009	782	3610	3343	3295	5570	5294	6709	Spon1
ENSMUSG00000031665	2089	1792	1924	3000	2165	2090	1680	1504	2104	Sall1
ENSMUSG00000054874	2516	2652	2784	2137	1904	1875	1760	1346	2015	Pcnx3
ENSMUSG00000030824	1418	1583	1464	3028	3001	2965	2206	2315	2513	Nucb1
ENSMUSG00000053644	1433	1451	1392	3322	2908	3136	3102	3223	3210	Aldh7a1
ENSMUSG00000004937	2577	2976	2628	2100	1879	1830	1843	2182	1963	Sgta
ENSMUSG00000049339	2069	2112	1717	2812	2489	2494	2415	2967	2675	Retreg2
ENSMUSG00000029836	3219	2026	3695	1572	1746	1558	1080	1302	1220	Cbx3
ENSMUSG00000038023	1871	1819	1804	2283	2332	2596	3316	2715	3387	Atp6v0a2
ENSMUSG00000033237	2350	1404	2162	2217	2478	2304	2722	1777	2403	Arid2
ENSMUSG00000030201	1845	1202	1854	2407	3303	2843	2810	2168	2930	Lrp6
ENSMUSG00000034297	2084	1267	2127	2775	2661	2375	2546	1664	2582	Med13
ENSMUSG00000025403	4134	3971	3843	1313	1206	1481	1059	1094	982	Shmt2
ENSMUSG00000041935	1739	1272	1722	2843	2759	2777	2215	2011	2702	AW549877
ENSMUSG00000060450	2157	1805	2050	2151	2839	2134	1790	2383	2099	Rnf14
ENSMUSG00000030315	2676	2321	1693	2060	1448	1684	2508	1969	2530	Vgll4
ENSMUSG00000040652	1424	1432	1334	2870	2649	2711	3341	3888	3350	Oaz2
ENSMUSG00000024642	3251	2834	3109	1703	2160	2200	1168	1255	1495	Tle4
ENSMUSG00000038095	2290	1394	2601	2163	2064	2080	2170	1557	2273	Sbno1
ENSMUSG00000029578	1694	1894	1760	3098	2647	2404	3865	3603	3671	Wipi2
ENSMUSG00000027706	1395	774	1729	3271	3558	2990	3091	3954	3574	Sec62
ENSMUSG00000037470	2505	2399	2607	1585	1575	1833	1345	1015	1511	Uggt1
ENSMUSG00000029439	2630	2222	2793	1957	1879	1739	1745	1395	1859	Sfswap
ENSMUSG00000041801	2294	2506	1865	2259	2045	2430	3033	3601	3003	Phlda3
ENSMUSG00000031256	3022	2005	2754	1618	1883	1834	1771	1607	1805	Cstf2
ENSMUSG00000041870	2908	2981	2483	1812	1582	1467	2008	1841	2022	Ankrd13a
ENSMUSG00000035847	1841	1514	1845	1908	2199	2409	2725	2474	2886	Ids
ENSMUSG00000024130	1493	1535	1544	2758	2483	2488	2797	1509	2669	Abca3
ENSMUSG00000029221	1589	1545	1915	2591	2651	2678	2840	3321	2721	Slc30a9
ENSMUSG00000028138	2455	2458	2020	2146	1853	1880	2286	3152	2484	Adh5
ENSMUSG00000035227	2543	2729	2352	1831	1926	2085	1831	2391	1930	Spcs2
ENSMUSG00000041570	2736	1954	2662	2620	2441	2100	2196	1854	2362	Camsap2
ENSMUSG00000091896	2248	2317	2128	1885	2110	2057	2006	2615	2105	Ube2d2a
ENSMUSG00000059409	3373	3312	2797	1463	1348	1583	1331	1198	1347	Ppp2r5d
ENSMUSG00000052738	2218	2419	2105	2009	2123	2025	3027	3923	2706	Suclg1
ENSMUSG00000020894	1263	1496	1343	3225	2906	2856	3382	3244	3159	Vamp2
ENSMUSG00000020037	2699	2626	3308	802	1069	1022	2501	2348	2687	Rfx4
ENSMUSG00000020863	2040	1170	2230	2264	2447	2079	2182	2608	2412	Luc7l3
ENSMUSG00000028530	1672	1366	1759	2705	2505	2488	3264	3065	3375	Jak1
ENSMUSG00000025234	2153	1615	2394	2243	2160	2263	2293	2038	2356	Arih1
ENSMUSG00000029775	2725	2194	2556	1908	2053	1996	1756	1455	1778	Klhdc10
ENSMUSG00000024112	2925	3140	2971	1398	1199	1009	2921	1540	2623	Cacna1h
ENSMUSG00000024095	3853	2963	3643	1023	1203	1151	1046	1208	1157	Hnrnpll
ENSMUSG00000032547	1958	1710	1849	2298	2616	2612	1673	2082	1865	Ryk
ENSMUSG00000041841	3426	4349	3172	1459	1100	911	808	1267	970	Rpl37
ENSMUSG00000037720	2314	1814	2587	2042	2351	2381	1898	2248	2135	Tmem33
ENSMUSG00000032434	1187	1391	1353	3111	3183	3292	2155	2765	2426	Cmtm6
ENSMUSG00000042105	2814	2194	2878	1978	2112	2073	1540	1535	1448	Inpp5f
ENSMUSG00000055839	2469	2814	2256	2025	1767	1849	1950	3050	2039	Elob
ENSMUSG00000028134	2899	2053	2783	1944	2477	2245	1285	1407	1300	Ptbp2
ENSMUSG00000031834	2715	2882	2391	1934	1703	1587	1490	1522	1614	Pik3r2
ENSMUSG00000118664	2635	2492	2282	2027	2311	2120	1870	2811	2078	Tusc3
ENSMUSG00000054808	2741	2572	2143	1746	1788	1934	3272	2582	2997	Actn4
ENSMUSG00000020580	2514	1373	3076	2083	2474	2121	2137	1798	2081	Rock2
ENSMUSG00000038855	641	683	684	3180	3237	3024	4953	4216	5208	Itpkb
ENSMUSG00000014959	2999	3155	3013	1614	1669	1674	1576	1819	1570	Gorasp2
ENSMUSG00000018849	3593	3725	3803	1216	1583	1458	5005	4563	4549	Wwc1
ENSMUSG00000019210	2085	2313	2102	2296	2229	2363	2480	3760	2534	Atp6v1e1
ENSMUSG00000032314	1102	920	1039	2731	2820	2662	3754	5212	3930	Etfa
ENSMUSG00000030091	4098	3404	2883	748	1220	1140	246	180	266	Nup210
ENSMUSG00000021109	2998	2104	3274	1403	1862	1842	1568	1885	1799	Hif1a
ENSMUSG00000034832	3670	3045	3680	1208	1054	1126	1131	668	899	Tet3
ENSMUSG00000034681	3623	3635	3098	1431	1483	1353	1297	1488	1298	Rnps1
ENSMUSG00000061689	2389	2699	2923	2499	2097	1988	1991	2158	2134	Dlgap4
ENSMUSG00000038773	2395	1961	2017	2354	1941	1876	2011	1245	1859	Kdm3b
ENSMUSG00000070565	2283	1879	2621	1782	2380	2059	2589	1769	2800	Rasal2
ENSMUSG00000011877	2774	2838	2555	2242	1893	1895	1858	1666	1906	Git1
ENSMUSG00000035566	555	312	503	3489	4299	3981	608	485	910	Pcdh17
ENSMUSG00000003099	3057	3251	2719	1783	1661	1630	1451	1835	1516	Ppp5c
ENSMUSG00000021140	1826	1742	2033	2209	2136	2059	2495	1456	2362	Pcnx
ENSMUSG00000037013	2004	1601	1908	1975	2587	2678	1982	1957	2020	Ss18
ENSMUSG00000025027	2891	3084	2579	1657	1701	1680	1491	1715	1454	Xpnpep1
ENSMUSG00000061273	2601	1803	2239	1895	2105	2117	1952	2241	2182	Mmgt1
ENSMUSG00000049532	2757	2503	2355	1517	1245	1348	1442	1202	1500	Sall2
ENSMUSG00000049076	1523	1074	2104	2883	2623	2380	3216	2658	3112	Acap2
ENSMUSG00000029147	4072	3818	3130	1412	1456	1416	1270	1566	1265	Ppm1g
ENSMUSG00000032435	2365	2358	2527	1754	2412	2123	2466	3980	3227	Dync1li1
ENSMUSG00000022400	2703	2939	2508	1742	1682	1777	1718	2385	1879	Rbx1
ENSMUSG00000031028	2554	2466	2589	1167	2133	1868	2688	2527	3824	Tub
ENSMUSG00000035027	2706	2798	2543	2310	1975	1835	1704	2172	1842	Map2k2
ENSMUSG00000022139	1483	1142	1945	2854	2806	2280	4674	4255	4245	Mbnl2
ENSMUSG00000025580	3674	3537	2958	1430	1501	1529	1298	1923	1367	Eif4a3
ENSMUSG00000109336	2314	2042	2175	1977	1834	1962	1741	1339	2012	Samd4b
ENSMUSG00000033272	2632	2808	2293	2042	2109	2247	1577	1770	1761	Slc35a4
ENSMUSG00000023832	3167	3754	3567	669	1025	867	496	780	628	Acat2
ENSMUSG00000060992	2744	3294	2808	1379	1507	1589	1832	2630	1792	Copz1
ENSMUSG00000036940	2804	2664	2713	1446	1491	1407	1851	1929	1777	Kdm1a
ENSMUSG00000042744	1833	1796	2047	2426	2062	2150	1806	911	1972	Hectd4
ENSMUSG00000063659	2171	1792	2189	1773	2160	1905	1923	2142	2027	Zbtb18
ENSMUSG00000036180	3377	3548	2946	1635	1611	1578	1775	1815	1957	Gatad2a
ENSMUSG00000021556	2806	2151	2423	1472	1955	2045	427	363	474	Golm1
ENSMUSG00000040462	1408	1365	1193	3287	2345	2470	2528	2703	2764	Os9
ENSMUSG00000070576	908	798	687	2459	2952	3229	1680	1591	2303	Mn1
ENSMUSG00000025544	2281	2083	2300	2207	2411	2285	2155	2317	2187	Tm9sf2
ENSMUSG00000031592	2685	1510	2979	1668	1866	1459	2055	1456	1908	Pcm1
ENSMUSG00000021770	2019	1535	2003	2403	2595	2268	2318	2205	2669	Samd8
ENSMUSG00000021589	2203	1363	2399	1730	1888	2033	2358	2657	2874	Rhobtb3
ENSMUSG00000034908	942	1195	1070	2877	2686	2639	2929	2511	2669	Sidt2
ENSMUSG00000033917	1751	2012	1492	2381	2493	2409	2252	2898	2229	Gde1
ENSMUSG00000052997	4067	3545	3247	1224	1375	1424	1152	1371	1126	Uba2
ENSMUSG00000024695	2371	1589	2169	2296	2501	2398	2458	2741	2619	Zfp91
ENSMUSG00000021843	1608	1066	2319	2902	2918	2436	2202	2358	2288	Ktn1
ENSMUSG00000001576	3356	3492	3286	1779	1769	1902	1267	1103	1214	Ergic1
ENSMUSG00000043683	2465	2605	2276	2119	1904	1968	1679	1558	1736	Fem1a
ENSMUSG00000027770	2517	1433	2860	1846	2012	1966	1881	1876	1910	Dhx36
ENSMUSG00000021901	2297	2341	2282	2161	1816	1963	2038	1758	2085	Bap1
ENSMUSG00000030161	1301	1459	1338	4071	2738	2946	3127	3131	3207	Gabarapl1
ENSMUSG00000071528	1838	2444	1838	2216	1979	1699	1691	3155	2284	Atp5md
ENSMUSG00000020978	2797	2750	2612	1709	1512	1626	1553	1829	1641	Klhdc2
ENSMUSG00000040260	90	133	130	5761	5297	3702	6198	4848	5181	Daam2
ENSMUSG00000028945	2127	2010	2339	1964	1977	2034	2617	3386	2928	Rheb
ENSMUSG00000043445	2411	2483	2050	1978	1880	1902	861	952	870	Pgp
ENSMUSG00000067279	523	363	200	3281	4040	3940	3917	5232	4465	Ppp1r3c
ENSMUSG00000052698	1768	2075	1884	2068	1883	2242	2965	1609	2894	Tln2
ENSMUSG00000095041	999	1076	1021	3893	3532	2337	3718	3666	2951	-
ENSMUSG00000020886	1784	2033	2526	2258	1661	1787	1550	1308	1517	Dlg4
ENSMUSG00000031451	1903	2082	2000	1278	1370	1308	3158	3510	3015	Gas6
ENSMUSG00000024816	2590	2974	2461	1566	1357	1209	2879	3678	2910	Frmd8
ENSMUSG00000025266	2671	2343	2576	1794	1878	1979	1877	1648	1797	Gnl3l
ENSMUSG00000028580	2470	2279	2547	2031	1940	2031	2046	1662	2196	Pum1
ENSMUSG00000032118	2880	3267	2830	1007	986	1173	2164	2530	1968	Fez1
ENSMUSG00000020737	4911	4289	3337	729	615	634	774	1292	731	Jpt1
ENSMUSG00000031731	2526	1894	2357	1921	1961	2117	1862	1480	2044	Ap1g1
ENSMUSG00000029146	2360	2530	2161	1937	1947	1943	1793	2392	1868	Snx17
ENSMUSG00000066568	2639	1948	2530	1708	1760	1838	2035	2197	2108	Lsm14a
ENSMUSG00000027469	4166	2091	2131	669	741	907	165	201	180	Tpx2
ENSMUSG00000052752	2690	2815	2700	1402	1335	1313	1365	1436	1462	Traf7
ENSMUSG00000029202	2658	1443	2874	1513	1925	1761	1686	1419	1759	Pds5a
ENSMUSG00000026858	880	1156	1076	3936	3560	3607	2298	2395	2497	Miga2
ENSMUSG00000028811	3205	3563	3455	1842	1609	1784	1049	1388	1196	Yars
ENSMUSG00000027605	2105	3334	3908	1413	1191	1242	1600	1963	1602	Acss2
ENSMUSG00000026926	2829	2891	2444	1813	1835	1887	1830	2059	1971	Pmpca
ENSMUSG00000049932	3889	3054	2109	754	997	1044	419	488	353	H2ax
ENSMUSG00000036646	1794	1850	1611	2559	2345	2372	2185	2011	2218	Man1b1
ENSMUSG00000060860	3516	2946	2077	1186	1346	1330	669	1071	748	Ube2s
ENSMUSG00000039067	2503	2944	2610	1825	2160	1789	1527	2363	1743	Psmd7
ENSMUSG00000046836	1788	1514	1775	2271	2363	2403	2704	2824	2829	Brox
ENSMUSG00000002957	2675	2711	2516	1767	1703	1824	1842	1865	1941	Ap2a2
ENSMUSG00000001100	1868	2233	1817	2266	2215	2174	2357	2526	2315	Poldip2
ENSMUSG00000019802	2014	1329	2245	2197	2286	2262	2204	2124	2125	Sec63
ENSMUSG00000024097	3674	3206	3371	1010	1116	1225	1213	1342	1170	Srsf7
ENSMUSG00000032549	1314	1288	1506	2492	2165	2678	3692	2933	4046	Rab6b
ENSMUSG00000026393	924	604	910	3474	4125	3876	1645	1771	1672	Nek7
ENSMUSG00000018446	3420	4500	3323	1413	1383	1361	1182	1600	1304	C1qbp
ENSMUSG00000071646	2644	2793	2287	1705	1558	1475	1484	1484	1531	Mta2
ENSMUSG00000024213	2461	2470	2185	2564	1961	1996	1959	2659	2280	Nudt3
ENSMUSG00000026662	3284	2689	2425	1445	1742	1655	1273	1349	1333	Sephs1
ENSMUSG00000027784	2657	1974	2274	1694	1384	1527	3177	1782	2916	Ppm1l
ENSMUSG00000021972	1892	1691	2099	2665	2483	2455	2061	1438	2297	Hmbox1
ENSMUSG00000026179	1268	1351	1289	3263	2380	2234	2093	2087	2106	Pnkd
ENSMUSG00000028693	4327	2619	3697	749	922	854	766	872	823	Nasp
ENSMUSG00000027187	1118	1135	1093	2135	2083	2413	3969	4013	4269	Cat
ENSMUSG00000056579	2166	1292	2016	2294	2260	2233	2100	1759	2177	Tug1
ENSMUSG00000020267	3501	3796	2873	1225	1163	1040	1160	1677	1195	Hint1
ENSMUSG00000005873	1892	1867	1563	1842	1999	2180	4036	4357	3635	Reep5
ENSMUSG00000026842	2775	2502	2345	1801	1600	1478	1656	1103	1605	Abl1
ENSMUSG00000041000	1470	1286	1591	1589	1929	2326	1383	1345	1626	Trim62
ENSMUSG00000014195	2183	1842	2282	2226	2058	1803	1964	2207	1920	Dnajc7
ENSMUSG00000032115	2074	2589	2606	1592	1409	1688	1420	1143	1424	Hyou1
ENSMUSG00000032480	2660	2505	2601	1655	1566	1572	1472	1419	1486	Dhx30
ENSMUSG00000036257	914	634	1302	3211	3176	2910	3208	3388	3400	Pnpla8
ENSMUSG00000052310	1656	1796	1505	1940	2040	2087	2774	3123	2783	Slc39a1
ENSMUSG00000021448	2633	2470	2718	1744	1383	1472	379	139	699	Shc3
ENSMUSG00000072501	1590	1147	2026	2415	2785	2313	2113	2143	1956	Phf20l1
ENSMUSG00000026305	3014	2305	3567	1021	1140	1330	610	560	673	Lrrfip1
ENSMUSG00000055932	2314	2362	2042	1966	2038	2194	1892	1868	1938	Fto
ENSMUSG00000000131	2561	2463	2915	1858	1504	1635	1546	1264	1679	Xpo6
ENSMUSG00000048264	2129	2010	2485	1813	1737	1975	1357	909	1429	Dip2c
ENSMUSG00000041958	1281	1582	1417	2542	2066	2274	1634	1634	1822	Pigs
ENSMUSG00000022822	1183	1115	1813	2871	2272	2159	2940	2336	3341	Abcc5
ENSMUSG00000025579	1882	2268	2198	1865	1851	1959	1251	1095	1277	Gaa
ENSMUSG00000022905	2289	1877	2194	1940	2376	2169	2382	2303	2215	Kpna1
ENSMUSG00000053963	5	9	3	5084	7169	6635	3045	2867	4685	Stum
ENSMUSG00000022257	2277	2301	2083	2365	2488	2719	2458	3368	2892	Laptm4b
ENSMUSG00000021737	2772	2644	2842	1739	1796	1759	1467	2276	1667	Psmd6
ENSMUSG00000026626	981	960	1144	2698	2451	2853	2183	2349	2408	Ppp2r5a
ENSMUSG00000037049	991	1011	894	3106	2858	3010	2550	2923	2786	Smpd1
ENSMUSG00000025583	2584	2517	2587	2200	1882	1877	1673	1130	1573	Rptor
ENSMUSG00000043531	2549	2107	3165	1593	1859	1892	1261	956	1572	Sorcs1
ENSMUSG00000022336	3386	2816	3165	1377	1565	1381	1134	1817	1371	Eif3e
ENSMUSG00000018547	2435	2492	2631	1610	1698	1734	1085	824	1226	Pip4k2b
ENSMUSG00000027775	1983	1883	1912	1939	2162	2081	1962	2421	2176	Mfsd1
ENSMUSG00000036155	2104	2164	2216	1824	2534	2540	3685	3953	4515	Mgat5
ENSMUSG00000031799	5314	4373	4171	886	902	922	962	1058	859	Tpm4
ENSMUSG00000038416	3045	2941	2724	1443	1509	1535	1338	1598	1430	Cdc16
ENSMUSG00000028670	4222	5602	4626	964	819	829	834	1103	949	Lypla2
ENSMUSG00000020440	2109	2654	2020	1693	1471	1407	1493	1968	1531	Arf5
ENSMUSG00000004677	2697	2731	3003	1528	1492	1410	2140	1508	1986	Myo9b
ENSMUSG00000021266	3034	3498	3314	1536	1436	1487	1574	1603	1499	Wars
ENSMUSG00000021236	482	508	533	2727	2696	2738	5134	4603	5188	Entpd5
ENSMUSG00000004771	2073	1868	2213	1740	2161	2157	1816	2347	1651	Rab11a
ENSMUSG00000032555	4178	2305	3007	848	1249	1132	789	694	827	Topbp1
ENSMUSG00000075012	2597	2626	2617	1785	1487	1513	2974	3500	2819	Fjx1
ENSMUSG00000097023	986	917	1084	2517	3553	2432	2395	2713	2375	Mir9-3hg
ENSMUSG00000002870	5689	4702	3250	392	710	769	203	192	200	Mcm2
ENSMUSG00000042650	2309	2233	2126	2084	1948	1763	2134	1989	2236	Alkbh5
ENSMUSG00000032018	1559	1473	1749	1438	2240	1944	1790	2798	2321	Sc5d
ENSMUSG00000036503	1057	811	1121	2946	3070	2733	3735	4979	4018	Rnf13
ENSMUSG00000027799	2093	1576	2793	2721	2688	2426	1872	1194	1717	Nbea
ENSMUSG00000030609	2839	2677	2927	1513	1480	1682	1828	1700	1964	Aen
ENSMUSG00000018286	2994	3231	2590	1514	1377	1366	1308	2182	1432	Psmb6
ENSMUSG00000032525	1556	1238	2656	2089	1973	1727	2063	923	2248	Nktr
ENSMUSG00000035585	2166	2333	1708	2049	1741	1708	1926	2556	2012	Tsen34
ENSMUSG00000032350	1485	1290	1288	2716	3708	2937	5162	6036	5293	Gclc
ENSMUSG00000021364	1024	903	754	3934	4507	4788	1580	1392	1686	Elovl2
ENSMUSG00000022897	2218	1913	1950	2236	2293	2268	3649	3785	3813	Dyrk1a
ENSMUSG00000020646	1338	1183	1211	2950	2780	2685	3264	2545	3377	Mboat2
ENSMUSG00000000374	2005	1843	1792	2219	1817	1784	2519	2043	2560	Trappc10
ENSMUSG00000020231	1503	1427	1579	2367	2196	2136	2229	1639	2238	Dip2a
ENSMUSG00000022817	530	750	598	1353	1872	2269	827	972	1165	Itgb5
ENSMUSG00000023353	2489	2651	2263	2067	1713	1662	1611	1672	1708	Agap3
ENSMUSG00000015647	1640	2177	2418	2164	1638	1490	1555	1042	1776	Lama5
ENSMUSG00000024431	1597	835	1565	2400	2629	2694	2585	2445	3283	Nr3c1
ENSMUSG00000030647	2850	2556	1993	1426	1576	1687	1183	2133	1353	Ndufc2
ENSMUSG00000027499	2079	1437	1929	2085	2136	2075	2081	2603	2222	Pkia
ENSMUSG00000026355	5414	4612	3568	365	738	735	274	296	224	Mcm6
ENSMUSG00000027809	1029	912	1007	2709	2649	2518	2799	3211	2859	Etfdh
ENSMUSG00000067150	2955	3007	2676	1595	1709	1783	1817	1511	1881	Xpo5
ENSMUSG00000015094	1836	2140	1980	2285	1812	1926	2398	2894	2413	Npdc1
ENSMUSG00000052684	3435	3101	2750	1413	959	927	1244	1527	1404	Jun
ENSMUSG00000029730	5441	4535	3158	522	772	733	393	414	384	Mcm7
ENSMUSG00000084883	1481	1450	1144	3488	3366	2811	1553	1790	1881	Ccdc85c
ENSMUSG00000033326	2198	2203	2325	1868	1645	1493	1537	1336	1476	Kdm4a
ENSMUSG00000038894	2628	2570	1796	1580	1770	1811	2115	1397	1953	Irs2
ENSMUSG00000041120	784	1075	787	2782	2140	2012	7540	9821	7051	Nbl1
ENSMUSG00000024188	2116	1802	2474	1692	1692	1914	1797	1657	1930	Luc7l
ENSMUSG00000040842	2253	2412	2209	1994	1683	1744	2668	2631	2441	Szrd1
ENSMUSG00000029817	1774	1527	2194	2101	1467	1880	1850	1516	2141	Tra2a
ENSMUSG00000106379	1499	917	1620	1947	2413	2624	680	902	1230	Lhfpl3
ENSMUSG00000006299	1832	2091	1883	2590	2228	2191	1927	2997	2308	Aamp
ENSMUSG00000028551	2879	2184	1649	1182	1268	1262	756	1122	759	Cdkn2c
ENSMUSG00000041313	4741	4205	5031	958	1219	1223	520	459	686	Slc7a1
ENSMUSG00000032193	2184	2297	2231	731	971	949	816	802	1067	Ldlr
ENSMUSG00000029152	1872	2037	1915	2141	2132	2193	2592	3082	2655	Ociad1
ENSMUSG00000028416	1549	1756	1429	1728	1637	1724	2033	2791	2013	Bag1
ENSMUSG00000015002	1796	1203	1654	2498	2667	2575	2200	2360	2606	Efr3a
ENSMUSG00000031948	3898	3872	3155	1081	1050	1088	1031	1148	988	Kars
ENSMUSG00000027540	2864	3032	2820	1381	1332	1303	1334	1174	1273	Ptpn1
ENSMUSG00000058301	2702	2687	2272	1793	1635	1805	1635	1321	1616	Upf1
ENSMUSG00000026843	2391	2170	2355	1886	1869	1680	1454	1652	1670	Fubp3
ENSMUSG00000030846	1732	1317	2177	2407	2557	2178	1915	1984	2105	Tial1
ENSMUSG00000027404	3364	3406	2647	1377	1375	1193	1253	1646	1224	Snrpb
ENSMUSG00000019978	2397	2067	2608	2036	1551	1606	1580	1424	1728	Epb41l2
ENSMUSG00000074656	2938	1973	3515	1737	2047	1742	1285	1899	1436	Eif2s2
ENSMUSG00000013629	3771	3816	3492	873	747	900	945	584	819	Cad
ENSMUSG00000024750	2547	2121	2602	2433	2110	1863	3176	3369	2747	Zfand5
ENSMUSG00000021477	1131	1135	1151	2237	2116	2127	4236	6496	4304	Ctsl
ENSMUSG00000029250	2820	2288	2358	1446	1540	1602	1680	1652	1694	Polr2b
ENSMUSG00000028207	1273	1058	1308	2597	2469	2516	3216	3273	3246	Asph
ENSMUSG00000028719	2008	1996	2070	1801	1974	1995	1997	2661	2075	Cmpk1
ENSMUSG00000003810	3767	3811	3885	895	1076	1152	924	646	854	Mast2
ENSMUSG00000034109	1662	1081	2034	2365	2281	2275	2574	2431	2617	Golim4
ENSMUSG00000029068	1623	1534	1943	2031	1806	1797	1694	1746	1930	Ccnl2
ENSMUSG00000053754	2425	1640	2304	1809	1856	1748	1804	1122	1783	Chd8
ENSMUSG00000027010	1709	1578	1774	2446	2244	2199	2311	2281	2217	Slc25a12
ENSMUSG00000021244	2166	1679	2379	1942	1752	1866	1857	1099	1927	Ylpm1
ENSMUSG00000027803	950	977	1360	2169	2988	2637	2282	2591	2085	Wwtr1
ENSMUSG00000071072	2979	3116	2867	1466	1424	1701	1485	1770	1827	Ptges3
ENSMUSG00000029103	1429	1605	1318	2912	2862	2672	2299	2689	2448	Lrpap1
ENSMUSG00000001228	5523	4513	3247	281	587	554	135	106	124	Uhrf1
ENSMUSG00000032997	2106	2244	1847	2190	2249	2246	1456	1979	1562	Chpf
ENSMUSG00000023307	2401	2187	2247	1782	1793	2012	1592	1814	1672	Marchf5
ENSMUSG00000031508	1564	1249	1626	2834	2779	2581	1635	1688	1974	Ankrd10
ENSMUSG00000034462	1287	956	1636	3066	3113	2504	2810	2181	2769	Pkd2
ENSMUSG00000073838	1887	2268	1984	1812	1707	1913	1923	2293	1927	Tufm
ENSMUSG00000041431	4764	2478	1844	524	638	758	87	104	113	Ccnb1
ENSMUSG00000039703	2746	2891	2501	1780	1925	1692	1465	1460	1552	Nploc4
ENSMUSG00000037933	2010	1856	2446	2018	1835	1929	1906	1627	2134	Bicd2
ENSMUSG00000017831	1424	1188	1761	2479	2503	2205	2147	2362	2267	Rab5a
ENSMUSG00000050812	1856	1380	2486	1757	1901	1884	1906	1795	2074	Ecpas
ENSMUSG00000063455	1290	1074	1313	2621	3024	2704	2861	1599	3619	D630045J12Rik
ENSMUSG00000028833	1979	2193	2011	1879	1678	1843	2103	1810	1658	Ncdn
ENSMUSG00000034648	3977	3368	2511	1253	996	1093	533	624	907	Lrrn1
ENSMUSG00000042363	1063	665	1160	2143	2732	3014	944	938	762	Lgalsl
ENSMUSG00000066979	3546	2935	2439	1161	1232	1383	1366	1693	1202	Bub3
ENSMUSG00000059981	1978	1821	1538	2089	1613	1603	2585	2006	2494	Taok2
ENSMUSG00000030842	1897	2058	1615	2026	2085	2096	2153	2629	2192	Lamtor1
ENSMUSG00000036622	1467	1688	1487	2434	2163	2253	1626	1607	1853	Atp13a2
ENSMUSG00000003458	2084	2087	2012	1612	1645	1678	1374	1473	1493	Ncstn
ENSMUSG00000075232	2592	1904	2094	2264	2077	1674	3451	5322	3945	Amd1
ENSMUSG00000021131	3097	3452	2837	1159	1211	1194	1116	1707	1280	Erh
ENSMUSG00000041891	1964	1546	1999	1498	1466	1675	1234	1105	1339	Lman1
ENSMUSG00000024002	2844	2636	2681	1607	1491	1327	1489	1008	1596	Brd4
ENSMUSG00000037119	2387	1648	2243	1814	1953	1994	2299	1913	2235	Fam91a1
ENSMUSG00000016252	1544	2608	1693	2040	1716	1662	1840	2790	1896	Atp5e
ENSMUSG00000026965	1795	1870	1818	2203	1834	1964	2234	2425	2394	Anapc2
ENSMUSG00000023025	2552	1387	2673	1792	2023	1723	1792	2018	1885	Larp4
ENSMUSG00000031754	2829	2482	2478	1505	1665	1558	1534	1727	1638	Nudt21
ENSMUSG00000028893	3418	3379	2996	1699	1355	1561	1613	1341	1686	Sesn2
ENSMUSG00000042605	1829	1762	2089	1970	1935	1982	2145	1440	2308	Atxn2
ENSMUSG00000101188	3604	5163	4001	783	856	781	562	963	667	Eif4a-ps4
ENSMUSG00000030513	369	310	218	4198	5268	4941	524	436	504	Pcsk6
ENSMUSG00000058258	1749	1457	2518	676	1271	1026	1030	1739	1396	Idi1
ENSMUSG00000031729	1977	1957	2050	2064	1838	1849	1917	2264	2076	Ist1
ENSMUSG00000045767	2439	1378	2275	1630	1939	1916	1913	1751	1988	B230219D22Rik
ENSMUSG00000031059	1779	1889	1490	2464	2233	2051	1559	2734	1874	Ndufb11
ENSMUSG00000029227	2274	1686	2496	1166	1034	1246	1346	957	1281	Fip1l1
ENSMUSG00000046897	2217	2093	2144	2125	1945	1813	1313	1527	1440	Zfp740
ENSMUSG00000035202	1604	1821	2454	2205	1642	1941	1660	1361	1643	Lars2
ENSMUSG00000022744	1886	1960	1987	1794	1761	1928	1393	1537	1593	Cldnd1
ENSMUSG00000023118	2348	2422	2458	1944	1667	1751	1565	1340	1582	Sympk
ENSMUSG00000024583	2983	2977	2837	1336	1552	1495	1691	1993	1718	Txnl1
ENSMUSG00000034354	1733	1780	1807	2453	2237	2070	2243	1830	2317	Mtmr3
ENSMUSG00000030411	2862	3184	2632	1447	1201	1123	1702	1090	1480	Nova2
ENSMUSG00000030410	2507	2921	2573	1749	1493	1549	1324	1460	1528	Dmwd
ENSMUSG00000014498	2222	1978	2105	1957	1931	1766	2442	1250	2109	Ankrd52
ENSMUSG00000003731	1884	1937	1999	2058	2014	2048	1917	1299	1862	Kpna6
ENSMUSG00000022451	1895	1589	1832	1771	1934	1871	2384	2928	2303	Twf1
ENSMUSG00000056050	2083	1395	2509	2234	1973	1742	1497	1462	1533	Mia3
ENSMUSG00000025609	1692	1155	1923	2528	2792	2319	2723	2468	2624	Mkln1
ENSMUSG00000047459	2209	2399	2018	1751	1594	1653	1558	2420	1678	Dynlrb1
ENSMUSG00000053768	1573	1765	1697	2504	2252	2025	1931	2506	2077	Chchd3
ENSMUSG00000055762	3031	3386	2750	1583	1481	1546	1402	1971	1441	Eef1d
ENSMUSG00000048537	1927	2162	1813	1607	1606	1489	2322	1927	2035	Phldb1
ENSMUSG00000033287	2364	2774	2192	1583	1361	1339	1635	1888	1745	Kctd17
ENSMUSG00000042323	2476	1417	2593	1691	1661	1491	1749	1307	1777	Pbrm1
ENSMUSG00000041168	2197	2138	1950	2204	1906	1968	1929	2190	2152	Lonp1
ENSMUSG00000035615	630	633	487	4728	3870	3462	1049	1121	1317	Frmpd1
ENSMUSG00000027566	3154	3857	3050	1320	1216	1208	1231	1860	1243	Psma7
ENSMUSG00000034675	3258	3034	2384	1488	899	1026	2735	2463	2568	Dbn1
ENSMUSG00000077450	2089	2033	1745	2288	2128	2245	2439	2888	2564	Rab11b
ENSMUSG00000026159	2517	1919	2638	1542	1588	1606	1545	1361	1605	Agfg1
ENSMUSG00000018765	2379	2092	1932	1967	1678	1853	1335	1626	1623	Fxr2
ENSMUSG00000029636	1064	1068	1476	2571	3101	3024	1767	1456	1826	Wasf3
ENSMUSG00000028436	1856	2049	1759	1985	1848	1958	2205	2251	2237	Dcaf12
ENSMUSG00000024302	1349	1050	1516	2604	1860	1947	4694	3996	4885	Dtna
ENSMUSG00000034312	1066	1234	1261	2744	2828	2210	5866	4319	6361	Iqsec1
ENSMUSG00000056770	1541	1554	1596	2169	2270	1987	1844	2241	1997	Setd3
ENSMUSG00000031988	1952	1902	1691	2269	1960	2054	2089	1842	2156	Vps26b
ENSMUSG00000003402	1990	2202	1962	1845	1462	1722	1492	1690	1588	Prkcsh
ENSMUSG00000024026	1470	1502	1495	2366	2437	2518	2584	3359	2836	Glo1
ENSMUSG00000002496	1944	1875	1703	2105	2038	1982	1763	1373	1892	Tsc2
ENSMUSG00000051615	2267	1929	1881	1773	1664	1729	1655	1696	1841	Rap2a
ENSMUSG00000029992	1784	1346	1976	2023	1878	2273	2072	1640	2225	Gfpt1
ENSMUSG00000065979	1441	1625	1337	1947	2007	1866	3201	3216	3213	Cpped1
ENSMUSG00000071337	1497	1076	1968	1743	1568	1513	1871	1365	1985	Tia1
ENSMUSG00000020134	3510	2366	3053	936	1371	1491	940	941	882	Peli1
ENSMUSG00000053293	3461	3527	2776	1230	1285	1354	1047	719	960	Pom121
ENSMUSG00000021500	2842	1577	2818	1713	1876	1611	1395	1425	1488	Ddx46
ENSMUSG00000070372	2960	2363	2664	1122	1279	1339	1352	1474	1340	Capza1
ENSMUSG00000027852	2905	2801	3176	1053	887	1010	1649	1741	1710	Nras
ENSMUSG00000023909	1543	1762	1188	1576	1323	1322	4805	4547	4750	Paqr4
ENSMUSG00000028675	1897	1515	1669	1923	1883	2068	1689	1858	2040	Pnrc2
ENSMUSG00000021194	88	117	82	2806	3062	2316	4047	6450	3520	Chga
ENSMUSG00000031176	1269	826	1573	2328	2672	2507	2001	2965	2187	Dynlt3
ENSMUSG00000026872	1782	1124	2173	2336	2166	1942	2512	1756	2450	Zeb2
ENSMUSG00000032625	792	653	981	2726	3205	2938	1720	1194	1764	Thsd7a
ENSMUSG00000037364	2962	2684	2700	1311	1350	1464	1243	1284	1460	Srrt
ENSMUSG00000007682	806	348	886	5373	3581	3894	374	355	593	Dio2
ENSMUSG00000033953	2559	2409	2584	1623	1945	1847	1541	2154	1643	Ppp3r1
ENSMUSG00000037851	3522	3136	3775	1284	1334	1527	739	730	966	Iars
ENSMUSG00000025404	1694	1695	1905	2325	2008	1972	1673	1310	1816	R3hdm2
ENSMUSG00000075595	1755	1426	1814	2254	2503	2171	1762	1237	1610	Zfp652
ENSMUSG00000008763	2213	1348	2153	1731	1888	2057	1568	1330	1698	Man1a2
ENSMUSG00000026918	2607	1934	2175	1780	1692	1656	1579	1083	1655	Brd3
ENSMUSG00000062647	3557	4016	2149	925	742	996	667	624	580	Rpl7a
ENSMUSG00000034902	2449	2308	2160	2290	1692	1743	1373	1273	1431	Pip5k1c
ENSMUSG00000014601	2361	2447	2410	1462	1422	1451	1228	1370	1350	Strip1
ENSMUSG00000045817	2891	3048	2317	1580	1402	1366	1272	1710	1175	Zfp36l2
ENSMUSG00000024486	1656	2691	2081	1803	3478	3489	1856	3143	2229	Hbegf
ENSMUSG00000028383	434	435	499	3231	2889	2899	3242	3816	3516	Hsdl2
ENSMUSG00000023977	1470	1441	2132	2389	2051	1927	1841	1144	1953	Ubr2
ENSMUSG00000015944	883	823	820	3633	2830	2697	3134	2402	3456	Castor2
ENSMUSG00000031967	2227	2265	2008	1894	1789	1806	1491	1249	1649	Afg3l1
ENSMUSG00000024614	2202	1453	2521	1558	1728	1563	1587	1978	1660	Tmx3
ENSMUSG00000027562	1006	1248	1300	3684	3632	3855	1308	1865	1673	Car2
ENSMUSG00000047238	1720	1939	1754	2088	2464	2104	960	1494	1054	Mageh1
ENSMUSG00000029167	632	403	742	3934	3055	2527	3664	2738	3136	Ppargc1a
ENSMUSG00000036879	941	786	1152	2087	2139	2271	2448	2204	2369	Phkb
ENSMUSG00000038717	1548	1946	1645	1978	2021	1750	1884	3146	1981	Atp5l
ENSMUSG00000024601	2362	1900	2037	1785	1913	1961	958	1054	1026	Isoc1
ENSMUSG00000030519	2885	2694	2645	1139	846	952	2241	1542	1823	Apba2
ENSMUSG00000038025	2695	2700	2470	1667	1453	1376	1353	954	1357	Phf2
ENSMUSG00000026353	1543	1225	2079	2062	1985	2014	2804	2550	2771	Ubxn4
[truncated: 53,706 more rows]
